# Supplementary material for: Two forms of Opa1 cooperate to complete fusion of the mitochondrial inner-membrane
Source: eLife journal article supplement (doi:10.7554/elife.50973), 2020-01-10
Supplement: supp [file elife-50973-supp-v1.zip]

Archive with 25 entries (25 files):
- elife_poa_e50973_Figure_6_figure_supplement_1.png
- elife_poa_e50973_Figure_3_figure_supplement_1_source_data_1.zip
- elife_poa_e50973_Figure_4_source_data_1.zip
- elife_poa_e50973_Figure_2_source_data_1.zip
- elife_poa_e50973_Figure_3_figure_supplement_2_source_data_1.zip
- elife_poa_e50973_Figure_2_figure_supplement_5_source_data_1.zip
- elife_poa_e50973_Figure_2_figure_supplement_3.png
- elife_poa_e50973_Figure_2_figure_supplement_2.png
- elife_poa_e50973_Figure_2_figure_supplement_5.png
- elife_poa_e50973_Figure_6_source_data_1.zip
- elife_poa_e50973_Figure_5_figure_supplement_1_source_data_1.zip
- elife_poa_e50973_Figure_3_figure_supplement_1.png
- elife_poa_e50973_Figure_2_figure_supplement_1.png
- elife_poa_e50973_Figure_5_source_data_1.zip
- elife_poa_e50973_Figure_3_source_data_1.zip
- elife_poa_e50973_Figure_4_figure_supplement_1.png
- elife_poa_e50973_Figure_5_figure_supplement_1.png
- elife_poa_e50973_Transparent_Reporting_File.pdf
- elife_poa_e50973_Figure_6_figure_supplement_1_source_data_1.zip
- elife_poa_e50973_Figure_2_figure_supplement_1_source_data_1.zip
- elife_poa_e50973_Figure_4_figure_supplement_1_source_data_1.zip
- elife_poa_e50973_Figure_2_figure_supplement_2_source_data_1.zip
- elife_poa_e50973_Figure_2_figure_supplement_4.png
- elife_poa_e50973_Figure_2_figure_supplement_3_source_data_1.zip
- elife_poa_e50973_Figure_3_figure_supplement_2.png
