# Supplementary material for: Two forms of Opa1 cooperate to complete fusion of the mitochondrial inner-membrane
Source: eLife journal article supplement (doi:10.7554/elife.50973), 2020-01-10
Supplement: supp [file Figure 2-fig sup 5.xlsx]

## Sheet: S2_resource
	TexasRed DHPE (liposome)	α-OPA1 (TR labeled)	α-OPA1 (TR labeled)+PL
0.01	75.8991	3.17052	74.4934
0.02	75.6847	3.33035	74.5997
0.03	75.3754	3.1069	74.324
0.04	75.2074	2.58554	74.109
0.05	74.8788	2.54298	74.343
0.06	75.2239	2.24505	74.0136
0.07	74.7343	2.11737	73.8988
0.08	74.6861	2.33017	73.7425
0.09	74.6914	1.98969	73.8493
0.1	74.2436	1.83009	73.7803
0.11	74.1628	1.73433	73.646
0.12	74.0065	1.89393	73.4774
0.13	73.8995	1.7024	73.3406
0.14	73.9845	1.5428	73.3231
0.15	73.5859	1.7556	73.3401
0.16	73.2927	1.596	73.135
0.17	73.5195	1.9684	72.864
0.18	72.9133	1.89392	72.9748
0.19	73.0893	1.60664	72.7647
0.2	73.0181	1.63856	72.9026
0.21	72.7318	1.69176	72.7379
0.22	72.8719	1.58536	72.6079
0.23	72.6205	1.596	72.7967
0.24	72.491	1.30872	72.419
0.25	72.4674	1.45768	72.5347
0.26	72.1506	1.10664	72.4215
0.27	71.8767	1.52163	72.3556
0.28	71.9136	1.22368	72.3548
0.29	71.9408	1.5429	72.1379
0.3	71.8905	1.28753	71.8529
0.31	71.6187	1.40468	71.7143
0.32	72.0391	1.31954	71.7773
0.34	71.2623	1.29835	71.4864
0.36	70.8489	1.35688	71.604
0.38	70.9987	1.35156	71.2247
0.4	70.6666	1.44202	71.0601
0.42	70.647	1.20257	70.8966
0.44	70.0437	1.29835	70.5879
0.46	69.9051	1.4633	70.4958
0.48	69.8555	1.21321	70.3313
0.5	69.505	1.42073	70.1983
0.52	69.4913	1.20256	69.976
0.54	69.0421	1.22385	69.469
0.56	69.0431	1.32495	69.2924
0.58	68.7523	1.17595	69.2687
0.6	68.6519	1.35155	68.9869
0.62	68.348	1.24513	68.8779
0.64	68.6593	1.1387	68.8546
0.68	67.852	1.19989	68.4955
0.72	67.658	1.19989	67.9556
0.76	67.0952	1.152	67.6299
0.8	66.7517	1.08548	67.2272
0.84	66.5665	1.06154	66.803
0.88	66.0894	1.18126	66.3641
0.92	65.7026	1.05355	66.0138
0.96	65.4369	1.16795	65.6819
1	65.2178	1.13602	65.3813
1.04	64.7253	1.19721	64.93
1.08	64.311	1.12271	64.5842
1.12	63.9509	1.13601	64.3665
1.16	63.657	1.19188	64.0387
1.2	63.4491	1.14399	63.7535
1.24	63.071	1.03225	63.402
1.28	62.8391	1.09876	63.2481
1.36	62.108	1.13733	62.485
1.44	61.3359	1.15462	61.9121
1.52	60.7735	1.09342	61.4009
1.6	60.009	1.16126	60.886
1.68	59.4261	1.13199	60.3496
1.76	58.7278	1.09474	60.0477
1.84	58.2214	1.08276	59.7956
1.92	57.5846	1.09747	59.4702
2	57.044	0.988386	59.2219
2.08	56.6069	1.11742	58.9835
2.16	56.0943	1.0948	58.7019
2.24	55.8795	1.10011	58.6055
2.32	55.2552	1.04956	58.5203
2.4	54.8369	1.10942	58.4172
2.48	54.4406	1.00832	58.3352
2.56	54.0039	1.03891	58.1563
2.72	53.3342	1.04089	57.7974
2.88	52.435	1.01029	57.2594
3.04	51.6449	1.08743	56.6859
3.2	51.0692	1.09541	55.8467
3.36	50.4826	1.09215	55.0561
3.52	49.8338	1.04034	54.0765
3.68	49.4472	1.02636	53.1698
3.84	49.0938	1.0217	52.6397
4	48.7463	1.00573	52.0639
4.16	48.3231	1.03565	51.4519
4.32	47.9713	1.00904	50.7239
4.48	47.4941	1.05692	50.0385
4.64	47.1649	0.959799	49.4467
4.8	47.1758	1.01433	48.6148
4.96	47.0643	0.999026	47.9341
5.12	46.4427	1.04225	47.4443
5.44	45.9786	1.01078	46.5063
5.76	45.5866	0.988481	45.1959
6.08	45.0474	1.00975	43.8923
6.4	44.5146	1.02917	42.5167
6.72	43.7922	1.00262	41.2714
7.04	43.002	1.01358	39.9244
7.36	41.8304	1.02029	38.4996
7.68	40.6711	1.0419	36.8062
8	39.3076	1.01095	35.3192
8.32	38.1599	1.02623	34.2274
8.64	37.2172	1.04584	33.2476
8.96	36.4222	1.00532	32.2338
9.28	35.8544	0.992992	31.5536
9.6	35.2684	1.04195	30.9775
9.92	35.1503	0.987378	30.7069
10.24	35.0638	1.0193	30.2234
10.88	34.563	0.999805	28.992
11.52	33.5374	0.981549	28.6389
12.16	32.116	0.957443	28.6236
12.8	30.871	0.98327	28.5986
13.44	30.083	1.02583	27.4141
14.08	29.7154	1.00474	25.8264
14.72	29.5614	1.0072	24.7264
15.36	29.2634	1.01416	24.4782
16	28.5665	1.03889	24.8947
16.64	27.8493	1.00947	25.8831
17.28	27.2764	1.00093	25.4159
17.92	26.1445	1.00473	25.1414
18.56	24.938	1.00577	24.887
19.2	24.1437	0.989665	23.9758
19.84	23.5903	1.02466	23.6525
20.48	23.6864	1.01888	23.7137
21.76	24.2125	1.0005	23.3955
23.04	23.4915	0.993934	23.2918
24.32	21.3375	1.01226	22.0224
25.6	19.9882	0.999603	22.6314
26.88	19.8602	0.983793	22.485
28.16	19.8518	0.982291	22.9617
29.44	19.3046	0.998537	22.7407
30.72	18.286	1.00047	22.4238
32	16.6329	1.00588	22.0366
33.28	15.0708	1.01378	21.505
34.56	13.6441	1.02436	20.7684
35.84	12.0487	0.970041	19.5431
37.12	11.0011	1.02345	18.6384
38.4	11.014	1.03293	16.7014
39.68	11.7712	1.00893	15.1014
40.96	12.3488	1.0025	14.7042
43.52	12.0658	1.00593	16.9368
46.08	10.0243	0.990217	17.4508
48.64	6.68294	0.999767	17.1145
51.2	4.6088	1.01176	15.4223
53.76	3.82474	0.99874	13.6232
56.32	3.68064	1.01068	14.1921
58.88	4.06001	1.00016	14.74
61.44	4.44083	0.999127	15.7238
64	5.23705	0.999854	15.5353
66.56	6.1248	0.985946	14.2
69.12	6.75574	1.00864	12.223
71.68	7.35925	0.996416	10.214
74.24	7.37375	1.00466	8.68271
76.8	6.17399	0.992999	7.49359
79.36	4.2161	0.997409	7.1658
81.92	3.50901	0.985918	7.357
87.04	2.75763	1.00347	9.37306
92.16	1.94768	0.990207	9.82444
97.28	1.71	1.01669	7.43958
102.4	1.23844	0.994928	5.33671
107.52	0.802031	1.00656	4.65208
112.64	0.791857	1.01093	4.95374
117.76	0.898234	0.997826	4.66356
122.88	0.57464	0.995728	4.22053
128	0.458854	1.00991	4.55773
133.12	0.426426	1.00116	4.68209
138.24	0.594263	0.99579	4.22418
143.36	1.17841	1.01604	3.44765
148.48	0.765348	0.996626	2.76755
153.6	0.598781	0.98817	2.62627
158.72	0.863756	1.00763	2.52551
163.84	1.47662	0.986111	2.34029
174.08	1.96814	0.992983	1.58282
184.32	1.43129	0.988472	0.939566
194.56	1.27316	1.00125	0.762395
204.8	1.76514	1.01317	0.695352
215.04	2.01318	1.00427	0.679105
225.28	2.0643	1.00117	0.679496
235.52	3.29056	1.0058	0.655108
245.76	3.18196	1.00185	0.794484
256	3.71649	0.997158	0.78551
266.24	3.51794	0.986776	0.718697
276.48	2.22683	0.998677	0.804818
286.72	1.64866	1.00749	0.717175
296.96	0.896911	0.989555	0.682549
307.2	0.413348	0.989517	0.629718
317.44	0.308134	1.00087	0.619412
327.68	0.301	1.00279	0.58546
348.16	0.337971	0.994091	0.600528
368.64	0.412216	1.00462	0.595939
389.12	0.44277	1.00465	0.596619
409.6	0.381878	1.00349	0.60961
430.08	0.321277	1.00444	0.60027
450.56	0.315172	1.0096	0.629668
471.04	0.31487	1.00131	0.845709
491.52	0.306214	1.00379	0.956424
512	0.312193	0.997738	1.03386
532.48	0.372905	0.997988	1.22116
552.96	0.396951	0.999781	1.6271
573.44	0.435893	0.993642	1.73639
593.92	0.415939	0.996819	2.94369
614.4	0.366597	0.9972	4.48878
634.88	0.488455	0.99308	3.78181
655.36	1.023	1.00442	2.08828
696.32	1.04243	0.999776	0.597704
737.28	0.424028	0.99486	0.419507
778.24	0.316427	0.994364	0.470694
819.2	0.38218	0.999636	0.694641
860.16	0.456507	1.00294	0.936883
901.12	0.630833	1.00226	1.58479
942.08	0.576297	0.999563	0.608169
983.04	0.545362	0.996478	0.408924
1024	0.348373	1.00341	0.439155
1064.96	0.429467	0.990418	0.409927
1105.92	0.515324	1.0018	0.397869
1146.88	0.812925	1.0025	0.533769
1187.84	0.655828	0.995229	1.7474
1228.8	0.429706	0.998602	2.33498
1269.76	0.357449	0.997315	3.25658
1310.72	0.310521	1.00392	5.84875
1392.64	0.405578	0.999281	2.88944
1474.56	0.436064	1.00011	1.1403
1556.48	0.368484	1.00619	0.745364
1638.4	1.22453	0.996733	1.41439
1720.32	1.16281	1.00117	0.953422
1802.24	0.61514	1.00143	1.06432
1884.16	0.339324	0.997804	1.32545
1966.08	0.280204	0.999971	0.842339
2048	0.272909	0.993226	0.571022
2129.92	0.656688	0.998337	0.792202
2211.84	0.44631	0.997425	1.96769
2293.76	0.318128	0.999508	1.01601
2375.68	0.945258	1.00434	1.22776
2457.6	0.65485	0.998846	0.739625
2539.52	0.463197	0.996967	1.29444
2621.44	0.34898	0.998989	0.958199
