# Supplementary material for: Two forms of Opa1 cooperate to complete fusion of the mitochondrial inner-membrane
Source: eLife journal article supplement (doi:10.7554/elife.50973), 2020-01-10
Supplement: supp [file Figure 2C_2D_GTPase_Activity-source data.xlsx]

## Sheet: figure2B_raw_summarized_pr
	5μM l-Opa1	5μM l-Opa1	5μM l-Opa1	5μM l-Opa1 + CL	5μM l-Opa1 + CL	5μM l-Opa1 + CL	2.5μM l-Opa1	2.5μM l-Opa1	2.5μM l-Opa1	2.5μM l-Opa1+CL	2.5μM l-Opa1+CL	2.5μM l-Opa1+CL	1μM l-Opa1	1μM l-Opa1	1μM l-Opa1	1μM l-Opa1+CL	1μM l-Opa1+CL	1μM l-Opa1+CL	0.8μM l-Opa1	0.8μM l-Opa1	0.8μM l-Opa1	0.8μM l-Opa1+CL	0.8μM l-Opa1+CL	0.8μM l-Opa1+CL	0.6μM l-Opa1	0.6μM l-Opa1	0.6μM l-Opa1	0.6μM l-Opa1 +CL	0.6μM l-Opa1 +CL	0.6μM l-Opa1 +CL	0.4μm l-OPA1	0.4μm l-OPA1	0.4μm l-OPA1	0.4μM l-OPA1+CL	0.4μM l-OPA1+CL	0.4μM l-OPA1+CL	0.2μM l-OPA1	0.2μM l-OPA1	0.2μM l-OPA1	0.2μM l-OPA1+CL	0.2μM l-OPA1+CL	0.2μM l-OPA1+CL
0	-0.236977	0.0525134	3	3.21	0.544865	3	-0.260233	0.107209	3	2.59483	0.0416372	3	-1.42302	0.169624	3	0.065335	0.634995	3	-0.0211831	0.38711	3	2.01884	0.282637	3	0		3	8.34258	0	3	0.107209	0.0167461	3	4.22814	0.660435	3	-1.49558	0.23361	3	-2.66721	0.416618	3
2	1.22814	0.30224	3	13.2049	2.2414	3	0.600233	0.339767	3	9.31532	0.0960372	3	-0.236977	0.0282476	3	0.22814	0.680473	3	-0.0169678	0.455637	3	3.34442	0.468219	3	0		3	9.56028	0	3	0.339767	0.0530717	3	5.57698	0.871124	3	-0.767209	0.119838	3	-1.60907	0.251337	3
4	2.60023	0.668134	3	17.4142	2.95588	3	1.2514	0.572326	3	14.724	0.200223	3	0.22814	0.0271942	3	0.902558	0.710705	3	-0.0127526	0.496567	3	6.67	0.9338	3	-0.0402977		3	10.778	0.00583107	3	0.572326	0.0893973	3	6.76302	1.05638	3	-0.0388372	0.00606637	3	-0.55093	0.0860553	3
6	3.90256	0.955324	3	21.7863	3.698	3	1.73977	0.804884	3	17.4142	0.278363	3	0.600233	0.0715477	3	3.55372	0.723625	3	-0.00853729	0.536567	3	9.99558	1.39938	3	-0.391261		3	11.9957	0.0566155	3	0.804884	0.125723	3	8.01884	1.25254	3	0.689535	0.107705	3	0.507209	0.0792261	3
8	5.4607	1.29898	3	26.1119	4.43223	3	2.62349	1.03744	3	20.8793	0.419758	3	0.902558	0.107585	3	6.20488	0.762902	3	-0.00432202	0.568816	3	11.3212	1.58496	3	-0.742225		3	13.2134	0.1074	3	1.03744	0.162048	3	9.04209	1.41237	3	1.41791	0.221477	3	1.56535	0.244507	3
10	6.50721	1.48635	3	28.7398	4.87829	3	3.4607	1.27	3	22.2281	0.553712	3	1.04209	0.124217	3	8.85605	0.802695	3	-0.000106744	0.612536	3	12.6467	1.77054	3	-1.09319		3	14.431	0.158184	3	1.27	0.198374	3	9.94907	1.55404	3	2.14628	0.335249	3	2.62349	0.409789	3
12	7.90256	1.76345	3	31.4142	5.33224	3	4.22814	1.50256	3	26.1119	0.676502	3	2.18163	0.26005	3	11.5072	0.833186	3	0.00410853	0.649746	3	13.9723	1.95613	3	-0.444153		3	15.6487	0.0642689	3	1.50256	0.2347	3	10.9723	1.71388	3	2.87465	0.449021	3	3.68163	0.57507	3
14	9.43744	2.02971	3	33.9258	5.75857	3	5.06535	1.73512	3	27.9723	0.810456	3	3.29791	0.393111	3	14.1584	0.862385	3	1.11496	0.687575	3	15.2979	2.14171	3	0.204884		3	16.8664	0.0296467	3	1.73512	0.271025	3	12.1351	1.89551	3	3.60302	0.562792	3	4.73977	0.740352	3
16	10.6467	2.16063	3	39.6312	6.72701	3	6.11186	1.96767	3	29.6235	0.977898	3	4.48395	0.534487	3	16.1584	0.884349	3	2.22581	0.724784	3	16.6235	2.32729	3	0.85392		3	18.0841	0.123562	3	1.96767	0.307351	3	12.9026	2.01538	3	4.3314	0.676564	3	5.79791	0.905633	3
18	11.3909	2.21828	3	42.1351	7.15201	3	6.8793	1.57233	3	31.4142	1.10069	3	5.57698	0.664776	3	18.2281	0.901145	3	3.33667	0.762304	3	17.9491	2.51287	3	1.32116		3	19.3018	0.191172	3	2.57233	0.401797	3	14.1119	2.20427	3	5.05977	0.790336	3	6.76302	1.05638	3
20	12.4142	2.34119	2	45.8173	7.77703	3	7.76302	1.08395	3	33.1816	1.24208	3	6.76302	0.806152	3	20.2747	0.944814	3	4.44752	0.802614	3	20.0886	2.8124	3	2.48395		3	20.5195	0.359428	3	3.08395	0.481714	3	14.8793	2.32415	3	5.78814	0.904107	3	8.01884	1.25254	3
22	13.4142	2.43686	3	47.8173	8.11651	3	8.71651	1.89791	3	34.7863	1.39464	3	7.00876	0.835444	3	22.3212	0.978147	3	5.55837	0.839823	3	21.9491	3.07287	3	3.85605		3	21.7372	0.55797	3	3.89791	0.608853	3	15.9026	2.48398	3	6.51651	1.01788	3	9.04209	1.41237	3
24	14.2204	2.48224	3	50.8328	8.62836	3	9.80953	1.59558	3	36.4948	1.56953	3	7.67775	0.915188	3	24.4374	1.00321	3	6.66922	0.877343	3	23.2088	3.24923	3	5.22814		3	22.9549	0.756512	3	4.59558	0.71783	3	17.1584	2.68014	3	7.24488	1.13165	3	9.94907	1.55404	3
26	15.3134	2.60865	3	53.2366	9.03638	3	10.7165	1.54907	3	38.7938	1.71464	3	8.41419	1.00297	3	26.6002	1.03293	3	7.78008	0.930986	3	25.5615	3.57861	3	6.60023		3	24.1726	0.955054	3	5.54907	0.866765	3	18.2979	2.85813	3	7.97326	1.24542	3	10.9723	1.71388	3
28	16.2436	2.65239	3	55.9767	9.50149	3	11.7398	1.4793	3	42.6435	1.87836	3	9.85747	1.17501	3	28.4142	1.07505	3	8.89093	0.958893	3	27.3405	3.82768	3	7.97233		3	25.3903	1.1536	3	6.4793	1.01207	3	18.9026	2.95258	3	8.70163	1.35919	3	12.1351	1.89551	3
30	17.8638	2.81069	3	59.0188	10.0179	3	12.8793	1.26999	3	44.5094	2.06069	3	10.2204	1.21827	3	31.1866	1.10166	3	9.67775	0.991451	3	28.5847	4.00186	3	9.34442		3	26.608	1.35214	3	7.26999	1.13557	3	19.9956	3.12331	3	9.43	1.47297	3	12.9026	2.01538	3
32	19.3832	2.95349	3	59.1584	10.0415	3	13.9026	1.66767	3	45.5792	2.22441	3	12.2436	1.45944	3	32.4812	1.12466	3	11.3909	1.03486	3	29.5382	4.13535	3	9.55372		3	28.201	1.38242	3	8.66767	1.35389	3	20.9491	3.27224	3	10.1584	1.58674	3	14.1119	2.20427	3
34	20.2049	2.9931	3	60.7863	10.3179	3	15.2189	1.27233	3	47.3931	2.43503	3	13.1894	1.57217	3	33.799	1.15102	3	12.4142	1.07269	3	31.2281	4.37194	3	10.6235		3	28.9878	5.53722	3	9.27233	1.44834	3	21.8095	3.40665	3	11.5305	1.80106	3	14.8793	2.32415	3
36	21.0886	3.95857	3	62.0653	6.14188	3	16.3296	1.78395	3	49.0327	2.17436	3	16.0653	4.1522	3	35.0606	1.16368	3	13.4142	1.37515	3	32.0809	4.22894	3	11.4374		3	30.0111	6.59966	3	9.78395	1.52825	3	23.1506	3.61613	3	12.7165	1.98632	3	15.9026	2.48398	3
38	21.7785	4.77013	3	61.9491	5.99096	3	17.4142	1.59791	3	49.9745	2.18748	3	17.9956	4.04736	3	35.8765	1.19131	3	14.2204	1.44957	3	32.9258	4.4756	3	12.0886		3	30.825	6.56677	3	10.5979	1.65539	3	24.9956	3.90431	3	13.763	2.14978	3	17.1584	2.68014	3
40	22.6235	5.19167	3	62.7165	6.04399	3	19.6467	1.29558	3	51.3583	2.177	3	18.7708	4.01448	3	36.9909	1.23659	3	15.3134	1.52461	3	33.732	4.69486	3	13.2049		3	31.6661	6.48181	3	11.2956	1.76437	3	25.8483	4.0375	3	14.856	2.32051	3	18.2979	2.85813	3
42	23.5227	5.16237	3	62.9723	6.0427	3	20.8793	1.24907	3	52.4862	2.17505	3	19.9491	3.95486	3	38.0044	1.27304	3	16.2436	1.60523	3	34.6312	4.6099	3	13.8095		3	32.5498	6.46537	3	12.2491	1.9133	3	26.6467	4.16222	3	16.1119	2.51667	3	18.9026	2.95258	3
44	24.4064	5.18064	3	63.8095	6.05411	3	21.7863	1.1793	3	53.9048	2.18094	3	21.1584	3.93636	3	39.1556	1.28877	3	17.1894	1.67965	3	35.6622	4.53864	3	14.9723		3	33.5925	6.41878	3	13.1793	2.05861	3	27.5847	4.30873	3	16.9956	2.65471	3	19.9956	3.12331	3
46	25.1351	5.16755	3	64.0653	5.95483	3	22.2281	1.97	3	55.0327	2.17089	3	21.8328	3.87059	3	40.0839	1.32024	3	18.1196	1.75469	3	36.3754	4.51945	3	15.6933		3	34.3871	6.44892	3	13.97	2.18211	3	28.3444	4.4274	3	17.9723	2.80728	3	20.9491	3.27224	3
48	25.825	5.24909	3	64.3909	5.96346	3	24.9723	1.85372	3	56.1955	2.15899	3	22.8095	3.80481	3	41.0103	1.33981	3	19.0576	1.86197	3	37.1274	4.48382	3	16.3444		3	35.294	6.3667	3	14.8537	2.32015	3	29.1971	4.56059	3	18.9956	2.96711	3	21.8095	3.40665	3
50	26.7165	5.24909	3	65.5072	6.03702	3	26.1119	1.78395	3	57.7536	2.15804	3	23.5537	3.81714	3	42.2351	1.37089	3	20.0653	1.91779	3	37.9878	4.47012	3	17.2049		3	36.0964	6.32559	3	15.784	2.46545	3	29.9491	4.67804	3	20.0886	3.13784	3	23.1187	3.61114	3
52	27.4995	5.10088	3	65.9491	6.07551	3	26.9956	1.48163	3	58.9745	2.14456	3	24.5692	3.76987	3	43.237	1.39161	3	20.9956	1.9829	3	38.7243	4.43449	3	17.8328		3	36.8289	6.28448	3	16.4816	2.57443	3	30.8173	4.81366	3	21.1351	3.30131	3	24.1394	3.77058	3
54	28.3754	5.02919	3	66.0653	6.15698	3	27.9723	1.45837	3	60.0327	2.13744	3	25.2902	3.67942	3	44.2041	1.41463	3	21.9336	2.06972	3	39.6312	4.41257	3	18.763		3	37.8987	6.25159	3	17.4584	2.727	3	31.7863	4.96502	3	22.3444	3.4902	3	25.1601	3.93001	3
56	29.3599	5.03847	2	66.67	6.20444	3	28.7398	1.57465	3	61.335	2.13284	3	26.0498	3.61159	3	45.3475	1.44917	3	23.2747	2.14538	3	40.6545	4.37145	3	19.8095		3	38.9258	6.16663	3	18.5747	2.90136	3	32.7863	5.12122	3	23.577	3.68272	3	26.1808	4.08945	3
58	30.0809	4.99564	3	67.856	6.08004	3	29.6235	1.3886	3	62.928	2.12445	3	27.1739	3.64653	3	46.5044	1.47258	3	23.9723	1.37515	3	41.3599	4.36871	3	20.3444		3	39.6816	6.15841	3	19.3886	3.0285	3	33.3832	5.21445	3	24.3909	3.80986	3	27.2015	4.24888	3
60	30.9103	4.95307	3	68.2281	6.12181	3	30.6002	2.24907	3	64.1141	2.0977	3	27.9103	3.5972	3	47.5122	1.4933	3	24.7863	1.44957	3	42.1351	4.28649	3	21.2514		3	40.5072	6.13374	3	20.2491	3.1629	3	34.2979	5.35733	3	25.4374	3.97333	3	28.2223	4.40832	3
62	31.6855	5.00148	3	69.1351	6.12255	3	31.4142	2.92349	3	65.5676	2.08235	3	28.7398	3.59926	3	48.6265	1.52591	3	25.8716	1.52461	3	42.8716	4.30294	3	22.1816		3	41.3018	6.11456	3	20.9235	3.26825	3	35.0266	5.47115	3	26.4374	4.12953	3	29.243	4.56775	3
64	32.4917	4.91184	3	69.3212	6.20384	3	31.9483	2.06302	3	66.6606	2.07404	3	29.7475	3.93225	3	49.5761	1.55853	3	26.8173	1.60523	3	43.8173	4.23168	3	22.9026		3	42.1933	6.10907	3	22.063	3.44624	3	35.8483	5.5995	3	27.4374	4.28573	3	30.2637	4.72719	3

## Sheet: figure2B_speed after fitting
concentration (μM)	CL(-）	CL(-）	CL(-）	CL（+）	CL（+）	CL（+）
5	0.0149315	0.00487364	3	0.2364	0.0270442	3
2.5	0.000149	0.00025	3	0.0705	0.0148217	3
1	0.000187	7.97e-05	3	0.01989	0.00387369	3
0.8	1.07e-05	0.00038427	3	0.01576	0.0018392	3
0.6	3.48e-06	0.013485	3	0.005428	0.00923718	3
0.4	2.6e-06	6.5404e-07	3	0.001674	0.00333333	3
0.2	1.1e-06	6.5404e-08	3	0.000182	1.87369e-05	3

## Sheet: figure2c_specific_activity
concentration (μM)	CL(-)	CL(+)
5	0.002994	0.04728
2.5	5.96e-05	0.0282
1	0.000187	0.01989
0.8	1.33e-05	0.0197
0.6	5.79e-06	0.009047
0.4	6.49e-06	0.004185
0.2	5.49e-06	0.000911

## Sheet: GTPase raw plate reader data
								concentration
		0.945967			0.820067			0.8861			0.8245			0.9519			0.8653			0.786667			0.752167			0.962233			0.8023			0.814967			0.752667			0.9352			0.855267			0.773967			0.975433
		0.951133			0.813533			0.88055			0.815933			0.950333			0.8552			0.7884			0.742733			0.9612			0.798967			0.8091			0.740533			0.933633			0.8479			0.769867			0.959467
		0.9434			0.81			0.87685			0.810133			0.944			0.8507			0.786133			0.7383			0.9549			0.7939			0.8052			0.732133			0.927267			0.8435			0.7626			0.949467
		0.9371			0.8062			0.8726			0.803033			0.938367			0.84735			0.782133			0.7332			0.948733			0.7887			0.803533			0.727833			0.921067			0.8392			0.758933			0.9447
		0.932633			0.803233			0.86915			0.798567			0.932633			0.84535			0.779967			0.7296			0.9435			0.7858			0.798467			0.721867			0.914533			0.835733			0.7553			0.9402
		0.928			0.7996			0.8651			0.7938			0.926467			0.83755			0.777233			0.7254			0.9364			0.7816			0.793333			0.718367			0.908367			0.831033			0.751833			0.936333
		0.916133			0.795733			0.86155			0.789267			0.9203			0.8333			0.7742			0.721933			0.9301			0.7784			0.7894			0.713			0.901967			0.827033			0.747967			0.9298
		0.912133			0.791933			0.85755			0.784133			0.914267			0.82975			0.771067			0.718033			0.923967			0.774033			0.785633			0.7092			0.895233			0.822967			0.743533			0.922433
		0.909633			0.7888			0.85355			0.779967			0.908667			0.82585			0.7696			0.715733			0.918167			0.770933			0.7828			0.705333			0.889267			0.818967			0.740467			0.917
		0.902633			0.785833			0.8499			0.7757			0.903			0.82195			0.7691			0.7119			0.912867			0.767667			0.780633			0.6995			0.884067			0.814933			0.737233			0.912833
		0.900767			0.782			0.84595			0.772133			0.897033			0.8184			0.765167			0.708033			0.906033			0.762833			0.775			0.694567			0.877333			0.8106			0.733533			0.9086
		0.895633			0.778633			0.8417			0.767133			0.891467			0.8144			0.76			0.703933			0.9006			0.759667			0.7707			0.690833			0.871467			0.8066			0.730367			0.901967
		0.8865			0.774867			0.8368			0.762333			0.8847			0.8106			0.754233			0.698833			0.8955			0.7561			0.767467			0.685733			0.866033			0.802567			0.726467			0.8986
		0.8793			0.770633			0.8319			0.757133			0.8783			0.80595			0.750367			0.6945			0.887733			0.751767			0.763633			0.680767			0.8577			0.7968			0.722067			0.8905
		0.878133			0.767533			0.82835			0.754367			0.873933			0.8025			0.747067			0.691233			0.8827			0.747167			0.7582			0.678767			0.853133			0.7938			0.719033			0.889433
		0.869333			0.763967			0.82475			0.749667			0.8678			0.7987			0.743167			0.687633			0.877033			0.7443			0.754767			0.674433			0.847133			0.7903			0.7157			0.882767
		0.8675			0.760633			0.82005			0.745633			0.861833			0.7944			0.739033			0.683733			0.870833			0.7401			0.7518			0.670133			0.8412			0.785633			0.712533			0.877333
		0.857433			0.757167			0.81635			0.741			0.8563			0.7904			0.739			0.680733			0.8652			0.736533			0.7484			0.665767			0.835967			0.781567			0.708467			0.872533
																													#DIV/0!
0.6133	0.7653	0.303981	0.151981			65.9491		30.6002		48.2747
0.6128	0.7618	0.304481	0.155481			66.0653		31.4142		48.7398
0.6102	0.7572	0.307081	0.160081			66.67		32.484		49.577
0.6051	0.7542	0.312181	0.163081			67.856		33.1816		50.5188
0.6035	0.751	0.313781	0.166281			68.2281		33.9258		51.077
0.5996	0.7473	0.317681	0.169981			69.1351		34.7863		51.9607
0.5988	0.7437	0.318481	0.173581			69.3212		35.6235		52.4723
						0.294874		0.516044
2.5 uM l-OPA1 no cl
0.9468	0.822	-0.029519	0.095281		2	-11.6091	17.4142					0.9086	0.008681	-2.72535
0.9446	0.8124	-0.027319	0.104881		4	-11.0974	19.6467					0.898	0.019281	-0.260233
0.9382	0.8071	-0.020919	0.110181		6	-9.60907	20.8793					0.8943	0.022981	0.600233
0.9322	0.8032	-0.014919	0.114081		8	-8.21372	21.7863					0.8915	0.025781	1.2514
0.9263	0.8013	-0.009019	0.115981		10	-6.84163	22.2281					0.8894	0.027881	1.73977
0.9212	0.7895	-0.003919	0.127781		12	-5.65558	24.9723					0.8856	0.031681	2.62349
0.9148	0.7846	0.002481	0.132681		14	-4.16721	26.1119					0.882	0.035281	3.4607
0.9082	0.7808	0.009081	0.136481		16	-2.63233	26.9956					0.8787	0.038581	4.22814
0.903	0.7766	0.014281	0.140681		18	-1.42302	27.9723					0.8751	0.042181	5.06535
0.8979	0.7733	0.019381	0.143981		20	-0.236977	28.7398					0.8706	0.046681	6.11186
0.8916	0.7695	0.025681	0.147781		22	1.22814	29.6235					0.8673	0.049981	6.8793
0.8857	0.7653	0.031581	0.151981		24	2.60023	30.6002					0.8635	0.053781	7.76302
0.8801	0.7618	0.037181	0.155481		26	3.90256	31.4142					0.8594	0.057881	8.71651
0.8734	0.7572	0.043881	0.160081		28	5.4607	32.484					0.8547	0.062581	9.80953
0.8689	0.7542	0.048381	0.163081		30	6.50721	33.1816					0.8508	0.066481	10.7165
0.8629	0.751	0.054381	0.166281		32	7.90256	33.9258					0.8464	0.070881	11.7398
0.8563	0.7473	0.060981	0.169981		34	9.43744	34.7863					0.8415	0.075781	12.8793
0.8511	0.7437	0.066181	0.173581		36	10.6467	35.6235					0.8371	0.080181	13.9026
						0.672345	0.644764	0.47		0.595703
2.5uM l-OAP1 with cl
0.786667		0.130614			2	25.6312	0.854375
0.7884		0.128881			4	25.2281
0.786133		0.131148			6	25.7553
0.782133		0.135148			8	26.6855
0.779967		0.137314			10	27.1894
0.777233		0.140048			12	27.825
0.7742		0.143081			14	28.5305
0.771067		0.146214			16	29.2591
0.7696		0.147681			18	29.6002
0.7691		0.148181			20	29.7165
0.765167		0.152114			22	30.6312
0.76		0.157281			24	31.8328
0.754233		0.163048			26	33.1739
0.750367		0.166914			28	34.0731
0.747067		0.170214			30	34.8405
0.743167		0.174114			32	35.7475
0.739033		0.178248			34	36.7088
0.739		0.178281			36	36.7165
						#NAME?
1uM
0.6431	0.8678	0.274181	0.049481		2	59.0188	1.68625		11.5072		35.263
0.6425	0.8612	0.274781	0.056081		4	59.1584			13.0421		36.1002
0.6355	0.8564	0.281781	0.060881		6	60.7863			14.1584		37.4723
0.63	0.8524	0.287281	0.064881		8	62.0653			15.0886		38.577
0.6305	0.8478	0.286781	0.069481		10	61.9491			16.1584		39.0537
0.6272	0.8429	0.290081	0.074381		12	62.7165			17.2979		40.0072
0.6261	0.8389	0.291181	0.078381		14	62.9723			18.2281		40.6002
0.6225	0.8344	0.294781	0.082881		16	63.8095		0.990563	19.2747		41.5421
0.6214	0.8301	0.295881	0.087181		18	64.0653			20.2747		42.17
0.62	0.8255	0.297281	0.091781		20	64.3909			21.3444		42.8677
0.6152	0.8213	0.302081	0.095981		22	65.5072			22.3212		43.9142
0.6133	0.8171	0.303981	0.100181		24	65.9491			23.2979		44.6235
0.6128	0.8122	0.304481	0.105081		26	66.0653			24.4374		45.2514
0.6102	0.8063	0.307081	0.110981		28	66.67			25.8095		46.2398
0.6051	0.8029	0.312181	0.114381		30	67.856			26.6002		47.2281
0.6035	0.7989	0.313781	0.118381		32	68.2281			27.5305		47.8793
0.5996	0.7951	0.317681	0.122181		34	69.1351			28.4142		48.7747
0.5988	0.7901	0.318481	0.127181		36	69.3212			24.8328		47.077
						0.294874
1um_cl
0.814967		0.102314			2	19.0498	0.634995
0.8091		0.108181			4	20.4142
0.8052		0.112081			6	21.3212
0.803533		0.113748			8	21.7088
0.798467		0.118814			10	22.8871
0.793333		0.123948			12	24.0809
0.7894		0.127881			14	24.9956
0.785633		0.131648			16	25.8716
0.7828		0.134481			18	26.5305
0.780633		0.136648			20	27.0343
0.775		0.142281			22	28.3444
0.7707		0.146581			24	29.3444
0.767467		0.149814			26	30.0964
0.763633		0.153648			28	30.9878
0.7582		0.159081			30	32.2514
0.754767		0.162514			32	33.0498
0.7518		0.165481			34	33.7398
0.7484		0.168881			36	34.5305
						0.452104
0.8uM
0.855267		0.0620143			2	9.67775	0.38711	0.437805
0.8479		0.069381			4	11.3909
0.8435		0.073781			6	12.4142
0.8392		0.078081			8	13.4142
0.835733		0.0815477			10	14.2204
0.831033		0.0862477			12	15.3134
0.827033		0.0902477			14	16.2436
0.822967		0.0943143			16	17.1894
0.818967		0.0983143			18	18.1196
0.814933		0.102348			20	19.0576
0.8106		0.106681			22	20.0653
0.8066		0.110681			24	20.9956
0.802567		0.114714			26	21.9336
0.7968		0.120481			28	23.2747
0.7938		0.123481			30	23.9723
0.7903		0.126981			32	24.7863
0.785633		0.131648			34	25.8716
0.781567		0.135714			36	26.8173
						0.4885
0.8uM+cl
0.773967		0.143314			2	28.5847	0.816707
0.769867		0.147414			4	29.5382
0.7626		0.154681			6	31.2281
0.758933		0.158348			8	32.0809
0.7553		0.161981			10	32.9258
0.751833		0.165448			12	33.732
0.747967		0.169314			14	34.6312
0.743533		0.173748			16	35.6622
0.740467		0.176814			18	36.3754
0.737233		0.180048			20	37.1274
0.733533		0.183748			22	37.9878
0.730367		0.186914			24	38.7243
0.726467		0.190814			26	39.6312
0.722067		0.195214			28	40.6545
0.719033		0.198248			30	41.3599
0.7157		0.201581			32	42.1351
0.712533		0.204748			34	42.8716
0.708467		0.208814			36	43.8173
						0.434397
0.6uM
0.8545		0.062781			2	9.85605	0.281601
0.8558		0.061481			4	9.55372		0.342867
0.8512		0.066081			6	10.6235
0.8477		0.069581			8	11.4374
0.8449		0.072381			10	12.0886
0.8401		0.077181			12	13.2049
0.8375		0.079781			14	13.8095
0.8325		0.084781			16	14.9723
0.8294		0.087881			18	15.6933
0.8266		0.090681			20	16.3444
0.8229		0.094381			22	17.2049
0.8202		0.097081			24	17.8328
0.8162		0.101081			26	18.763
0.8117		0.105581			28	19.8095
0.8094		0.107881			30	20.3444
0.8055		0.111781			32	21.2514
0.8015		0.115781			34	22.1816
0.7984		0.118881			36	22.9026
						0.404133
0.6uM +cl
0.822033	0.7429	0.0952477	0.174381		2	17.4064	0.497327	35.8095	1.02313		0.760228	0.371799
0.816033	0.7352	0.101248	0.182081		4	18.8018		37.6002	0.663121
0.812667	0.7318	0.104614	0.185481		6	19.5847		38.3909
0.807967	0.7277	0.109314	0.189581		8	20.6778		39.3444
0.804267	0.7244	0.113014	0.192881		10	21.5382		40.1119
0.800133	0.7213	0.117148	0.195981		12	22.4995		40.8328
0.796233	0.7176	0.121048	0.199681		14	23.4064		41.6933
0.791467	0.7134	0.125814	0.203881		16	24.515		42.67
0.788233	0.7098	0.129048	0.207481		18	25.2669		43.5072
0.783833	0.7064	0.133448	0.210881		20	26.2902		44.2979
0.780133	0.7032	0.137148	0.214081		22	27.1506		45.0421
0.776733	0.7003	0.140548	0.216981		24	27.9413		45.7165
0.771933	0.6959	0.145348	0.221381		26	29.0576		46.7398
0.767	0.692	0.150281	0.225281		28	30.2049		47.6467
0.7637	0.6888	0.153581	0.228481		30	30.9723		48.3909
0.76	0.6854	0.157281	0.231881		32	31.8328		49.1816
0.756467	0.6821	0.160814	0.235181		34	32.6545		49.9491
0.7526	0.6783	0.164681	0.238981		36	33.5537		50.8328
						0.469696		0.421881
0.4uM
0.8211		0.096181			2	17.6235	0.503528
0.8167		0.100581			4	18.6467
0.813		0.104281			6	19.5072
0.8083		0.108981			8	20.6002
0.804		0.113281			10	21.6002
0.7998		0.117481			12	22.577
0.796		0.121281			14	23.4607
0.7919		0.125381			16	24.4142
0.7872		0.130081			18	25.5072
0.7838		0.133481			20	26.2979
0.7797		0.137581			22	27.2514
0.7754		0.141881			24	28.2514
0.7711		0.146181			26	29.2514
0.7664		0.150881			28	30.3444
0.7626		0.154681			30	31.2281
0.7587		0.158581			32	32.1351
0.7545		0.162781			34	33.1119
0.7506		0.166681			36	34.0188
						0.482684
0.4uM+cl
0.6886	0.7457	0.228681	0.171581		2	48.4374	35.1584
0.6865	0.7421	0.230781	0.175181		4	48.9258	35.9956
0.6825	0.7393	0.234781	0.177981		6	49.856	36.6467
0.678	0.7355	0.239281	0.181781		8	50.9026	37.5305
0.6748	0.7322	0.242481	0.185081		10	51.6467	38.2979
0.6709	0.729	0.246381	0.188281		12	52.5537	39.0421
0.6682	0.7258	0.249081	0.191481		14	53.1816	39.7863
0.6644	0.7225	0.252881	0.194781		16	54.0653	40.5537
0.6613	0.7191	0.255981	0.198181		18	54.7863	41.3444
0.6581	0.7165	0.259181	0.200781		20	55.5305	41.9491
0.6548	0.7134	0.262481	0.203881		22	56.2979	42.67
0.6516	0.7098	0.265681	0.207481		24	57.0421	43.5072
0.6482	0.7061	0.269081	0.211181		26	57.8328	44.3677
0.6441	0.7022	0.273181	0.215081		28	58.7863	45.2747
0.6415	0.6997	0.275781	0.217581		30	59.3909	45.856
0.6375	0.6966	0.279781	0.220681		32	60.3212	46.577
0.6351	0.6937	0.282181	0.223581		34	60.8793	47.2514
0.6316	0.6903	0.285681	0.226981		36	61.6933	48.0421
						0.393201	0.962892
0.8787		0.038581			2	4.22814
0.8729		0.044381			4	5.57698
0.8678		0.049481			6	6.76302
0.8624		0.054881			8	8.01884
0.858		0.059281			10	9.04209
0.8541		0.063181			12	9.94907
0.8497		0.067581			14	10.9723
0.8447		0.072581			16	12.1351		#N/A
0.8414		0.075881			18	12.9026		#N/A
0.8362		0.081081			20	14.1119
0.8329		0.084381			22	14.8793
0.8285		0.088781			24	15.9026
0.8231		0.094181			26	17.1584
0.8182		0.099081			28	18.2979
0.8156		0.101681			30	18.9026
0.8109		0.106381			32	19.9956
0.8068		0.110481			34	20.9491
0.8031		0.114181			36	21.8095
						#N/A
0.2uM
0.8612	0.8386	0.056081	0.078681		2	8.29791	13.5537	0.387249	0.237083
0.8532	0.832	0.064081	0.085281		4	10.1584	15.0886
0.8473	0.8261	0.069981	0.091181		6	11.5305	16.4607
0.8422	0.82	0.075081	0.097281		8	12.7165	17.8793
0.8377	0.8156	0.079581	0.101681		10	13.763	18.9026
0.833	0.811	0.084281	0.106281		12	14.856	19.9723
0.8276	0.8055	0.089681	0.111781		14	16.1119	21.2514
0.8238	0.8007	0.093481	0.116581		16	16.9956	22.3677
0.8196	0.796	0.097681	0.121281		18	17.9723	23.4607
0.8152	0.7915	0.102081	0.125781		20	18.9956	24.5072
0.8105	0.7871	0.106781	0.130181		22	20.0886	25.5305
0.806	0.7828	0.111281	0.134481		24	21.1351	26.5305
0.8008	0.778	0.116481	0.139281		26	22.3444	27.6467
0.7955	0.7727	0.121781	0.144581		28	23.577	28.8793
0.792	0.7686	0.125281	0.148681		30	24.3909	29.8328
0.7875	0.7635	0.129781	0.153781		32	25.4374	31.0188
0.7832	0.76	0.134081	0.157281		34	26.4374	31.8328
0.7789	0.7565	0.138381	0.160781		36	27.4374	32.6467
						0.54434	0.555692		0.550016	0.391449
0.2uM+ cl
0.7088	0.6718	0.208481	0.245481		2	43.7398	52.3444		1.24971	1.49555
0.7016	0.6647	0.215681	0.252581		4	45.4142	53.9956
0.6966	0.6604	0.220681	0.256881		6	46.577	54.9956
0.6929	0.6555	0.224381	0.261781		8	47.4374	56.1351
0.6887	0.6527	0.228581	0.264581		10	48.4142	56.7863		0.533638
0.6839	0.6496	0.233381	0.267681		12	49.5305	57.5072		0.732327
0.6804	0.6447	0.236881	0.272581		14	50.3444	58.6467
0.677	0.6412	0.240281	0.276081		16	51.1351	59.4607
0.6738	0.6381	0.243481	0.279181		18	51.8793	60.1816
0.6706	0.635	0.246681	0.282281		20	52.6235	60.9026
0.6684	0.6319	0.248881	0.285381		22	53.1351	61.6235
0.6648	0.6282	0.252481	0.289081		24	53.9723	62.484
0.6609	0.625	0.256381	0.292281		26	54.8793	63.2281
0.658	0.6219	0.259281	0.295381		28	55.5537	63.9491
0.6548	0.6186	0.262481	0.298681		30	56.2979	64.7165
0.6515	0.6156	0.265781	0.301681		32	57.0653	65.4142
0.6481	0.6125	0.269181	0.304781		34	57.856	66.1351
0.6444	0.6097	0.272881	0.307581		36	58.7165	66.7863
						0.413637	0.406785
0.7125		0.204781				42.8793
0.7103		0.206981				43.3909
0.7072		0.210081				44.1119
0.7028		0.214481				45.1351
0.6991		0.218181				45.9956
0.696		0.221281				46.7165
0.6929		0.224381				47.4374
0.6898		0.227481				48.1584
0.6898		0.227481				48.1584
0.6824		0.234881				49.8793
0.6796		0.237681				50.5305
0.6793		0.237981				50.6002
0.6713		0.245981				52.4607
0.6681		0.249181				53.2049
0.6647		0.252581				53.9956
0.6625		0.254781				54.5072
0.6603		0.256981				55.0188
0.657		0.260281				55.7863
[truncated: 9 more columns]
