# Supplementary material for: Two forms of Opa1 cooperate to complete fusion of the mitochondrial inner-membrane
Source: eLife journal article supplement (doi:10.7554/elife.50973), 2020-01-10
Supplement: supp [file Figure 3-fig sup 2-source data1.xlsx]

## Sheet: +CL
(+)CL PL	(+) CL PL after GTP t=0	(+) CL PL after GTP t=1h
155.483	117.272	156.101
231.155	146.532	137.591
144.916	79.7991	844.751
92.0828	149.27	204.699
102.249	432.967	50403.9
214.644	63.1975	473.888
104.097	249.286	1904.34
155.695	175.207	212.956
281.523	78.3066	386.935
152.28	168.841	107.806
197.137	211.746	163.298
595.841	297.468	127.789
200.856	137.96	319.191
224.342	105.168	91.9574
218.369	114.917	289.92
184.467	127.22	873.783
135.063	109.524	1777.49
222.201	123.643	102.554
228.053	297.984	145.719
340.867	224.768	448.198
111.502	205.241	136.706
182.364	201.334	91.9421
568.164	150.021	137.265
324.82	143.359	121.102
186.995	187.32	187.379
259.576	277.125	117.558
456.733	197.724	806.159
144.684	170.952	137.083
90.1726	95.946	119.596
255.907	165.763	132.146
132.382	107.791	55.4231
68.5734	128.2	50403.9
156.043	201.944	354.437
131.281	129.825	707.439
137.123	202.637	204.476
102.396	247.32	66.0032
317.085	149.646	30.3073
64.9982	122.542	82.5126
85.5521	223.494	192.668
127.262	161.305	534.113
195.767	132.781	171.299
286.266	134.983	187.84
154.947	330.166	163.165
234.249	51.0254	225.869
243.999	207.951	131.241
157.824	212.475	845.84
170.566	246.212	374.716
184.474	70.3935	68.6256
164.522	90.1765	812.783
269.476	192.127	438.782
174.216	77.8359	2164.72
121.733	97.2038	214.137
76.4017	176.503	3016.74
78.6091	238.409	189.244
68.0004	224.158	127.893
156.706	280.106	61.047
146.904	219.491	221.577
179.174	195.537	770.852
128.746	240.376	131.014
105.324	239.607	186.437
158.795	124.867	122.933
365.272	105.393	135.621
177.699	194.625	355.33
207.892	344.459	167.698
179.873	106.609	210.62
77.2186	91.4561	4265.04
113.087	121.646	200.33
129.391	174.708	90.8133
82.5946	143.227	453.017
95.4619	259.444	269.992
494.181	345.996	7420.06
255.151	240.437	78.1731
285.689	115.936	119.386
122.15	109.697	181.43
222.939	128.577	184.906
276.088	157.295	268.894
196.483	104.622	225.615
339.453	479.224	101.313
316.578	174.316	170.102
248.912	579.338	31.0305
120.743	417.691	2691.7
133.712	211.101	310.347
221.104	200.391	173.467
166.011	167.65	29.255
73.6317	374.265	85.4714
186.874	265.779	178.424
186.755	135.082	108.276
201.393	212.027	185.257
213.934	126.363	294.273
214.368	170.332	3598.97
121.186	99.7152	405.197
261.622	327.464	71.8073
102.137	368.549	442.861
138.719	91.1105	483.37
139.162	150.659	34.7092
196.86	91.6612	122.885
192.224	258.775	59.2031
187.665	171.286	199.283
260.679	252.208	177.373
168.738	198.56	173.44
161.274	121.618	2713.2
172.397	161.155	42.0732
190.038	104.926	162.652
221.375	151.658	91.0526
261.371	220.6	159.775
115.158	136.153	223.972
252.848	123.296	233.545
104.951	266.421	149.732
105.578	63.1525	57.8224
215.369	87.9642	139.754
112.663	258.839	181.416
293.799	139.849	240.911
131.75	265.263	148.665
778.571	320.669	202.391
330.383	99.8716	202.737
150.408	187.847	35.13
610.62	173.219	223.065
327.633	105.571	142.088
168.238	229.138	149.552
359.636	200.081	222.091
167.161	101.684	108.171
90.2913	152.683	30.1158
96.6042	110.081	569.066
121.389	168.338	129.1
99.3665	154.887	92.4799
212.956	110.826	211.322
76.3502	167.282	1471.35
487.996	204.278	850.646
204.229	216.849	1991.25
406.662	189.642	111.386
187.644	415.778	28.8028
236.911	187.638	66.6926
244.114	295.848	59.9769
348.548	203.897	130.825
268.426	267.315	209.826
114.252	192.715	38.2432
195.229	326.264	1610.3
171.848	123.983	819.753
155.493	196.342	35.4663
126.496	165.741	259.576
196.431	100.178	212.09
112.223	390.8	166.897
249.277	143.846	205.045
229.046	160.024	117.154
189.799	137.249	36.702
70.8418	210.205	35.7258
312.479	228.952	102.865
161.411	133.758	990.628
211.377	207.345	234.135
126.562	166.934	447.139
184.001	118.523	187.307
296.313	99.7012	2239.16
117.408	402.569	725.557
144.406	178.351	87.6098
355.401	242.661	337.015
162.226	156.107	1154.78
111.16	155.226	448.437
467.331	115.389	1259.13
130.735	153.646	117.321
248.006	88.9749	468.439
228.32	129.456	294.378
232.018	92.3211	170.718
97.2931	73.1534	302.82
226.752	125.527	162.408
149.804	229.956	125.679
237.392	206.547	310.937
128.027	374.431	196.056
134.448	125.441	118.432
80.1355	141.822	157.583
74.0949	404.893	322.554
226.701	287.406	145.742
152.586	162.866	6944.27
239.774	170.232	31.8513
76.3412	222.592	148.998
151.279	162.12	26.8245
131.343	121.401	71.706
191.85	92.2576	44.9546
247.681	131.528	741.249
268.128	309.683	266.05
117.356	133.892	133.244
147.596	210.106	144.116
147.564	147.634	178.718
245.531	135.688	74.0182
222.927	147.236	87.9003
350.586	104.882	37.2711
276.864	148.899	48.4777
537.585	198.785	702.684
124.202	190.705	271.841
306.499	178.503	155.897
291.685	326.513	150.368
104.977	130.803	187.132
92.5561	69.3854	1573.52
139.478	95.1555	1197.68
177.703	99.7655	749.195
365.652	312.481	543.451
246.724	180.151	636.353
94.145	179.978	374.733
490.636	551.467	5263.05
177.044	176.399	217.185
121.693	154.968	233.41
226.499	225.465	82.9885
269.438	179.487	3738.15
107.834	188.676	199.297
170.333	338.527	50403.9
317.053	166.503	205.544
255.403	97.2464	252.928
137.23	223.464	120.12
310.681	122.511	49.6138
113.292	155.575	229.788
58.3797	246.011	252.084
195.279	90.734	176.633
223.934	80.4518	137.834
174.123	196.709	123.109
102.339	105.27	195.563
195.66	246.501	79.1789
165.69	133.913	249.445
111.341	123.838	266.63
76.5202	172.364	163.03
261.029	249.806	1201.41
197.686	160.488	229.578
237.833	181.081	126.001
430.353	215.242	27323.8
114.371	134.514	292.309
237.467	160.615	70.6047
216.778	113.737	113.906
224.835	108.844	2417.62
181.407	144.847	202.595
233.328	110.129	1710.99
163.537	105.176	43.653
101.798	183.931	406.257
254.06	186.512	38.297
104.338	164.102	200.518
192.959	185.1	216.898
117.388	129.079	1524.92
193.87	157.649	1732.64
151.446	113.191	261.647
199.042	200.613	187.601
124.005	326.691	139.435
264.859	146.112	201.139
310.79	57.6799	207.458
179.407	374.865	58.0605
114.24	167.977	62.4016
204.758	127.558	1039.53
153.655	125.109	120.462
290.707	115.04	1072.43
220.015	213.648	56.5828
204.551	100.551	762.279
284.901	192.326	160.329
71.3877	56.9004	6019.34
300.298	258.235	180.266
144.64	160.673	190.757
59.3124	148.151	109.54
421.526	196.377	223.43
172.039	143.747	90.9855
285.993	258.468	2972.38
217.974	233.982	299.012
210.548	193.992	87.9168
99.3673	208.408	46.6539
135.035	135.445	1038.14
220.223	307.122	50.5008
143.28	311.573	48.93
197.599	397.559	338.583
239.557	151.53	337.503
173.08	54.4549	345
153.656	99.7183	54.8753
255.992	107.364	170.107
124.339	121.024	938.692
79.8413	169.273	276.842
125.813	133.098	777.403
344.208	82.7307	456.878
260.11	170.179	3974.74
279.792	73.9927	66.3718
278.265	120.384	355.516
241.859	319.598	1303.9
127.075	324.819	363.467
207.859	117.282	232.19
210.739	97.2721	51.4153
454.415	121.925	184.278
342.054	174.851	284.843
82.0676	139.791	314.209
173.061	245.969	109.329
129.118	294.292	50403.9
168.247	316.301	183.566
302.358	109.157	242.625
144.864	116.748	149.34
208.436	123.322	1533.14
250.915	173.815	516.033
233.015	192.593	213.989
266.662	197.918	116.865
160.086	161.667	373.993
449.822	150.841	139.065
95.7181	206.851	299.625
63.5484	132.423	105.4
125.516	521.964	360.977
174.802	72.7475	116.875
64.9049	249.119	248.123
173.322	329.459	416.952
269.641	157.449	149.616
118.568	212.599	2177.68
131.545	138.967	2398.79
143.932	98.1324	34.441
279.491	230.875	725.063
136.17	168.269	170.112
155.477	299.72	518.088
237.622	227.46	450.39
172.031	323.475	158.174
68.3571	195.985	880.238
105.525	261.523	474.045
174.343	213.8	165.193
146.819	92.249	289.85
226.984	262.566	162.503
261.761	293.394	706.797
183.407	227.592	668.432
177.109	444.589	92.6225
163.954	106.943	81.7718
215.214	119.569	326.261
109.401	122.583	143.1
263.503	137.454	195.146
186.756	225.109	50403.9
169.71	105.903	218.368
98.8321	115.849	159.3
408.343	270.606	468.069
154.314	178.952	400.298
206.844	59.9766	1084.33
269.592	222.228	218.478
161.29	166.455	306.283
237.882	156.596	102.549
178.57	286.488	75.1792
99.8732	177.888	85.0166
168.219	247.642	200.114
84.7107	182.811	136.832
242.642	239.531	188.829
195.085	198.757	299.853
344.108	337.617	213.701
51.8867	215.408	321.321
185.431	178.457	687.536
209.231	284.045	209.416
460.914	189.253	299.359
244.661	140.932	249.128
162.469	205.625	520.936
202.103	269.078	171.342
110.383	285.09	297.579
264.995	120.698	71.2662
153.304	62.9257	853.946
112.189	223.845	3734.35
263.481	112.427	310.527
167.998	279.279	226.081
389.417	282.116	843.107
177.077	181.265	236.919
190.66	110.564	153.777
95.4773	90.4701	164.911
199.374	150.101	561.452
89.6992	369.085	81.7752
89.3395	426.144	146.219
176.932	173.443	61.1161
177.129	173.58	298.253
160.076	178.097	256.794
103.848	244.555	189.93
138.658	122.073	255.145
81.3532	367.082	96.4471
138.461	153.095	290.91
381.156	151.07	683.459
363	256.825	105.244
79.9674	97.7232	174.405
111.16	243.179	154.456
259.37	134.45	167.892
174.454	219.372	114.819
199.144	121.388	209.799
163.313	141.121	358.143
229.03	104.415	195.684
194.579	388.885	485.466
107.661	170.126	157.669
211.321	121.022	131.909
215.306	154.47	53295.8
105.233	174.41	50403.9
160.604	135.964	358.485
210.355	134.361	134.923
137.312	152.101	70.2065
139.97	211.652	452.277
174.476	175.604	159.798
141.064	188.546	244.012
141.016	112.886	288.842
173.715	163.395	151.382
138.559	111.128	1481.94
552.355	135.967	4791.54
117.81	275.407	212.125
196.827	166.288	110.611
299.094	171.96	213.904
166.761	110.15	172.005
189.166	87.4949	193.578
161.387	100.794	133.701
662.277	186.293	2281.3
186.801	196.505	193.112
242.387	283.306	210.55
241.056	144.273	303.67
616.156	92.6683	191.748
492.103	243.017	50403.9
123.741	116.101	140.83
152.882	274.96	6009.08
130.421	277.056	182.548
91.5361	106.511	949.247
87.1977	200.531	117.954
122.667	136.899	165.609
196.689	189.486	100.843
218.827	200.673	371.013
161.545	156.094	96.9598
195.313	192.88	183.444
274.985	120.991	50403.9
56.5185	114.16	289.535
164.238	143.854	166.069
120.951	181.236	91.4929
293.871	156.201	1786.86
130.539	160.616	461.061
174.866	159.922	54.893
148.005	186.242	3570.69
166.241	88.652	51.7803
148.276	155.377	48.8502
137.53	215.782	112.263
131.975	179.194	252.763
141.519	105.171	1476.51
134.509	449.868	419.324
480.881	129.496	121.999
122.275	145.889	157.169
93.2579	228.995	163.891
199.541	138.229	404.942
188.254	171.414	228.013
555.302	201.541	164.029
150.165	194.996	56.068
129.825	100.16	167.326
207.834	147.351	222.908
222.509	95.8399	80.4349
310.193	302.107	317.879
72.1757	125.034	78.4122
297.253	177.688	176.78
355.679	284.851	149.54
140.751	83.9328	1192.78
175.96	66.497	2175.91
175.827	196.315	50403.9
136.076	143.735	75.0043
190.764	278.274	274.071
191.15	100.113	115.116
170.846	337.033	128.874
209.287	160.405	561.054
80.0467	141.212	185.991
153.235	156.337	129.582
263.009	130.003	423.744
199.836	256.087	93.3098
194.771	131.245	215.031
170.477	144.049	1242.8
95.4747	319.293	125.251
280.07	502.778	51.5859
160.317	281.392	303.777
117.477	290.541	160.464
106.781	141.425	3007.97
139.727	120.425	160.557
352.353	111.73	1224.07
132.103	195.336	106.358
137.264	120.404	98.9749
122.109	138.303	154.931
124.328	103.057	132.3
198.447	100.961	190.97
105.814	176.098	185.36
144.401	156.26	633.71
187.163	137.98	109.954
146.719	184.64	266.446
319.215	108.753	2899.46
82.7137	129.113	121.154
177.613	219.273	260.933
116.676	119.276	37.2455
269.922	345.438	247.087
188.491	183.651	169.278
198.147	130.147	1254.93
113.113	181.994	296.698
133.172	129.205	4656.22
243.758	117.562	168.24
265.626	238.852	7406.08
159.463	107.788	200.205
153.753	397.021	392.606
111.322	163.677	100.556
252.854	147.356	1064.68
147.67	153.351	189.233
187.779	109.749	210.52
146.676	140.36	129.033
117.209	130.584	86.7874
104.49	123.936	183.428
141.361	290.307	141.129
86.6502	138.415	117.267
109.798	165.059	180.963
142.411	207.709	377.704
231.692	110.661	106.837
89.6911	111.667	209.711
126.467	158.209	836.142
357.505	200.387	1238.68
273.165	128.213	5205.32
312.545	91.9943	1521.82
230.126	112.556	51.5731
190.423	233.495	142.68
69.028	175.78	201.668
128.839	163.809	100.773
174.097	103.72	147.915
314.662	141.259	235.408
123.735	237.314	68.697
278.57	73.548	95.4423
339.188	119.176	126.742
436.864	135.564	50403.9
89.1536	85.9843	50403.9
202.71	141.802	420.889
66.6263	106.509	168.169
176.002	85.6064	50.8359
203.662	122.099	532.248
116.594	153.806	517.706
82.4176	438.522	84.6829
223.958	328.96	113.884
151.94	179.538	511.174
141.272	145.299	352.403
179.466	221.549	121.483
96.2897	183.608	169.021
190.342	189.14	67.695
219.553	212.955	793.3
172.143	182.011	549.337
614.953	88.1473	81.4502
170.133	191.169	52.378
301.812	211.656	277.555
167.419	341.106	137.061
160.962	293.18	685.047
188.814	167.851	36.0032
79.4243	94.8347	131.198
172.329	196.836	143.772
266.225	343.918	347.122
296.776	184.619	162.254
120.739	223.5	49.6404
209.929	109.932	186.948
145.446	173.185	738.451
187.02	242.638	343.755
169.521	226.647	150.837
182.881	135.502	100.374
119.776	130.518	183.783
152.926	209.534	354.203
114.405	98.9317	60.7848
221.798	196.418	200.012
76.8088	219.18	751.434
135.554	190.767	160.91
102.978	184.912	50403.9
236.678	362.853	259.184
175.732	156.803	138.755
79.869	393.596	53.4238
241.27	187.2	1624.33
155.579	87.3896	99.8178
543.231	60.7311	280.824
93.6296	119.067	161.846
211.565	120.444	241.625
219.075	407.351	121.701
139.703	155.298	774.336
126.196	93.1764	306.73
298.448	212.142	213.004
498.349	221.723	188.946
207.324	93.8318	500.407
122.148	67.7802	283.384
158.141	133.009	150.892
200.513	250.124	127.782
220.368	170.559	121.848
210.679	130.039	286.071
98.7815	261.078	189.05
209.256	191.202	13633.4
166.766	257.241	173.929
135.77	159.36	14728.9
135.352	130.694	149.028
146.815	513.748	3115.96
120.242	191.134	206.981
356.212	118.64	89.0124
202.55	218.692	221.229
473.94	144.545	295.19
317.567	193.918	40224.3
215.944	101.542	182.419
214.011	113.124	3633.61
208.682	205.336	40.5589
130.572	131.937	215.798
114.556	171.678	65.51
147.759	159.589	122.703
152.118	107.398	8137.28
65.2118	275.774	141.94
192.146	149.536	254.441
154.354	159.401	780.347
132.64	111.851	671.909
148.633	155.799	502.818
223.635	143.984	90.5302
103.066	316.522	225.783
73.6646	678.418	158.994
151.324	127.804	174.627
438.284	197.933	114.355
158.103	290.343	141.699
176.893	282.516	143.539
305.892	145.71	56.5213
113.168	151.898	46.6913
156.869	152.403	193.582
183.888	166.426	326.249
146.856	148.665	50403.9
131.879	118.409	148.614
183.18	253.732	169.848
126.157	156.113	213.486
71.7186	73.1541	144.319
100.191	172.983	141.47
142.671	266.187	123.13
250.278	119.036	138.099
276.127	134.954	328.244
107.343	182.209	169.551
105.966	112.954	154.423
144.56	109.103	277.614
230.479	68.6565	502.725
115.574	143.978	95.3499
142.084	82.8474	1080.06
81.0893	163.705	150.079
226.078	151.024	302.59
138.043	176.595	146.877
284.015	144.715	220.401
292.923	259.056	109.837
229.927	277.286	64.7628
302.16	262.046	237.222
89.0502	152.061	93.4247
267.777	136.032	325.62
237.817	100.33	100.837
226.602	131.819	1128.71
136.897	171.833	109.495
176.373	473.39	455.78
80.0911	131.23	118.53
104.177	151.768	292.963
68.292	148.853	157.253
359.789	256.659	326.105
163.568	137.625	167.34
277.406	76.2193	187.49
277.427	112.124	254.221
166.189	80.5049	5439.77
169.496	61.0987	184.07
117.656	216.092	110.704
407.076	65.7652	127.949
290.648	278.665	78.3134
198.699	137.866	99.2575
136.019	148.731	287.866
148.477	225.31	114.729
150.411	134.551	135.253
186.854	105.09	112.996
224.384	124.752	96.1745
589.017	444.786	118.211
97.5902	213.639	136.134
116.003	108.581	112.851
169.838	130.03	177.28
180.629	221.055	80.246
125.296	143.973	71.4772
271.796	80.6814	240.117
98.3114	152.009	174.729
137.685	186.713	261.088
122.955	210.934	305.78
277.668	181.784	129.615
150.657	184.139	77.6249
161.254	114.701	83.6124
149.234	217.401	505.495
321.912	141.921	161.597
104.19	154.238	184.056
152.99	121.394	312.157
219.3	177.078	217.325
232.7	158.874	297.337
111.721	81.7932	566.208
182.916	207.894	138.839
260.436	105.18	2061.12
109.218	92.9907	11526.1
299.545	109.358	212.984
125.882	180.12	219.664
170.648	162.531	146.987
268.027	152.686	515.655
314.261	124.666	236.969
371.156	167.681	130.965
177.765	149.884	353.834
218.696	108.384	50403.9
74.7123	109.701	4376.29
121.419	83.1401	57.4379
235.276	95.1922	1398.67
133.484	135.652	4406.9
432.462	120.332	111.964
254.407	118.562	591.951
219.694	160.718	54.8311
92.3492	181.49	1516
445.138	117.137	105.247
251.917	204.881	213.448
163.204	151.227	1182.24
148.741	124.874	280.194
130.499	365.883	233.558
137.941	103.776	507.468
174.737	188.738	63.415
195.082	200.464	130.02
264.761	246.024	458.908
216.999	258.067	122.862
337.337	259.704	444.279
113.605	95.5133	52.6707
443.147	222.082	417.973
253.08	94.0646	38.6157
247.49	161.798	140.84
152.928	209.397	153.42
143.542	340.728	517.73
152.939	163.795	215.973
127.151	185.244	3115.5
177.275	182.355	222.355
157.225	187.906	7033.37
164.127	149.637	549.146
111.454	256.542	349.073
88.6263	148.549	230.263
442.507	120.934	200.343
215.899	94.0108	668.63
436.079	275.031	270.416
250.329	129.016	42.0462
225.062	201.332	50403.9
238.365	161.689	1202.64
144.602	248.045	107.721
174.067	152.198	261.631
198.9	134.331	118.839
190.383	133.389	2758.12
203.568	183.629	1439.41
122.548	217.28	771.159
150.873	206.77	364.492
279.77	211.918	102.682
96.505	185.056	167.316
170.896	165.779	296.93
182.095	112.057	130.7
143.716	190.632	166.879
142.63	160.837	163.25
170.816	120.783	337.354
95.6733	130.125	122.595
118.657	217.43	559.37
136.735	186.608	612.92
217.008	214.144	116.99
182.99	176.318	164.514
111.615	181.212	354.621
127.595	93.0196	4173.36
183.615	124.54	72.6513
155.266	210.044	50403.9
191.539	105.979	50403.9
166.101	87.9326	113.393
187.438	264.606	449.298
209.069	200.288	227.676
301.648	192.689	230.694
113.808	356.081	90.7822
318.546	299.05	106.063
110.715	168.668	118.539
450.586	127.911	245.846
234.761	186.892	43.1044
200.678	133.075	184.818
80.8196	146.772	120.021
159.043	113.083	1678.86
172.834	201.942	400.004
159.27	201.341	348.045
219.804	69.0087	145.632
201.158	137.243	161.201
126.001	161.992	153.045
88.5199	109.763	131.316
188.759	156.366	457.275
106.353	129.815	427.567
231.585	149.066	327.306
244.681	178.128	2277.44
207.108	163.014	391.778
226.458	144.106	73.7692
162.505	122.879	114.277
346.991	226.599	1850.57
148.776	138.138	320.841
211.773	55.678	1082.32
172.512	146.672	37.1745
230.656	110.898	253.552
206.48	284.165	349.884
79.3286	201.301	192.493
196.927	197.318	4921.64
194.162	119.519	74.4588
119.702	238.946	209.165
87.5463	175.72	241.942
140.967	164.493	309.374
102.502	73.687	183.521
130.054	286.569	50403.9
124.154	297.605	215.518
178.267	198.709	2083.13
205.385	92.3878	48.216
205.642	302.643	901.629
66.0318	126.367	351.335
118.313	86.466	50403.9
113.352	258.624	130.39
320.498	118.843	330.47
246.132	115.921	191.157
297.692	120.67	391.743
100.457	166.482	287.744
100.744	121.6	1063.53
374.436	200.11	159.637
342.337	102.111	1055.17
138.052	185.526	564.592
148.815	266.614	203.818
144.522	142.949	149.738
522.948	73.2693	265.516
95.7812	153.26	184.165
286.741	107	129.904
215.73	134.152	81.393
185.167	168.662	160.433
70.9847	119.427	434.572
104.463	107.415	112.605
349.816	98.2362	189.734
310.633	197.504	77.923
532.396	123.6	90.253
125.5	183.325	397.998
185.982	472.93	50403.9
193.189	121.47	1637.3
114.444	297.259	360.888
218.972	197.489	381.522
73.0397	175.338	50403.9
201.774	329.726	60.8324
150.181	103.005	294.892
195.244	834.621	149.175
117.798	111.453	456.774
361.227	106.316	172.607
197.587	245.744	107.147
181.157	130.836	241.478
197.332	136.371	229.94
84.6853	127.51	1169.76
223.035	105.234	85.4621
65.5393	134.399	106.635
236.839	123.748	485.864
233.848	161.204	182.856
88.8183	168.841	385.333
105.758	358.39	245.889
173.474	98.8219	89.0222
132.254	155.593	144.333
259.207	347.588	898.126
230.723	146.637	210.189
126.398	97.2952	187.496
100.756	162.5	191.655
156.073	157.596	942.079
128.111	111.311	115.791
310.983	108.87	249.884
102.644	128.588	202.103
229.604	174.443	265.006
260.586	940.14	1017.83
342.185	73.2956	178.474
198.98	91.3217	234.392
125.129	102.107	116.112
159.256	168.858	1144.39
135.45	113.725	168.361
126.544	144.461	724.079
507.416	145.436	140.568
271.806	57.5569	94.1411
163.934	210.484	1868.6
82.8385	89.4591	524.885
116.49	131.563	189.77
127.237	60.2452	255.295
251.007	112.168	560.613
117.476	70.941	282.095
257.922	136.119	535.124
146.998	70.3848	189.413
34.36	141.498	8851.78
91.514	168.979	344.599
173.109	202.054	206.126
101.666	174.865	1821.08
181.903	421.529	46.1489
385.591	113.577	196.91
203.163	210.182	324.069
160.985	261.172	1097.24
73.542	127.213	132.729
138.176	651.385	508.625
188.841	137.864	140.226
156.324	179.541	77.5007
178.765	142.928	50403.9
440.867	169.496	83.1058
137.233	172.916	78.8223
87.6205	180.379	178.428
236.702	239.285	1084.67
133.702	155.572	38.2692
128.633	233.41	139.012
178.771	189.724	268.824
238.954	132.373	46.4085
73.026	114.925	2918.95
2437.94	132.728	162.263
144.694	100.033	12508.9
123.775	147.498	290.992
198.777	251.762	400.341
129.862	187.129	162.074
135.098	153.809	131.547
153.858	68.117	1540.07
125.763	100.769	81.0439
213.943	154.576	721.818
115.855	91.1493	149.17
151.245	135.869	160.771
266.759	253.969	172.039
89.9723	788.982	73.5858
443.492	290.669	155.879
220.698	185.133	102.073
137.533	181.285	533.889
243.637	168.883	116.833
142.402	151.63	191.944
130.234	164.939	14299.6
130.583	75.2655	28775.3
203.884	98.4276	30.7931
236.895	134.021	153.568
108.674	107.932	299.767
142.419	450.27	191.264
152.325	166.786	489.029
147.623	101.486	131.342
232.019	206.054	112.059
405.022	284.713	288.653
216.049	134.772	50403.9
157.739	157.316	167.765
207.167	94.3175	838.56
135.695	221.332	249.752
240.519	125.261	726.698
307.19	144.181	208.936
172.033	175.332	126.379
132.621	488.53	263.968
83.5217	70.1802	182.313
245.689	128.011	291.936
136.391	210.172	117.904
113.277	166.24	31.495
178.192	88.3541	181.655
218.25	145.27	215.879
270.68	140.911	42463.9
192.511	82.8952	395.263
295.273	125.12	394.33
213.82	83.74	67233.9
157.694	120.31	121.321
141.903	238.055	144.762
90.363	233.73	268.506
181.188	280.558	1074.09
214.968	124.68	189.063
113.164	305.78	106.167
97.0985	122.78	174.917
224.258	373.606	209.071
233.259	87.3723	840.677
55.5864	183.769	234.604
212.601	301.412	452.608
42.1843	144.399	50403.9
141.744	192.592	111.503
354.177	113.031	192.802
118.527	148.238	151.744
199.367	154.56	368.002
244.214	135.53	293.483
112.994	87.715	838.203
100.724	128.175	1446.13
86.8035	111.793	110.007
191.633	139.127	233.197
133.532	120.986	191.371
160.836	130.384	157.761
643.942	636.688	119.816
153.281	145.139	111.095
224.575	569.148	408.119
207.241	166.445	189.31
101.998	102.203	376.635
249.864	114.29	2739.59
138.181	210.225	543.183
87.1555	129.115	470.284
332.07	274.487	2108.07
262.557	263.614	459.645
426.352	80.1522	247.782
400.151	158.032	812.542
244.002	117.404	5611.51
434.167	208.571	672.703
184.066	271.285	47.4173
224.64	186.386	158.719
73.2305	125.095	98.1208
173.794	120.323	218.984
170.508	187.405	168.295
105.133	102.06	136.984
147.724	128.12	417.445
316.923	110.236	62.0924
811.919	149.094	83.3012
280.616	186.856	115.628
180.811	83.0813	216.791
272.84	169.106	49.8051
75.721	345.928	314.386
54.2478	301.731	88.029
190.22	137.891	326.483
109.98	185.539	194.392
190.716	206.425	215.4
122.75	88.4351	5749.25
126.559	170.265	90.9476
147.159	115.513	131.6
134.675	173.822	78.0899
98.1598	146.107	295.291
142.811	162.81	167.918
138.765	183.823	199.689
222.778	293.668	889.145
119.095	201.352	134.827
174.148	162.49	166.37
184.466	101.811	303.743
167.524	182.225	257.665
72.1822	151.544	76.5043
128.9	144.714	106.854
111.913	169.969	82.711
163.296	426.537	274.431
637.02	118.788	54.9535
99.7294	187.585	550.92
110.743	127.066	151.236
237.544	859.656	176.169
108.305	209.362	169.224
197.314	158.949	680.935
152.159	156.44	110.365
303.067	111.719	301.452
172.223	145.723	472.958
364.722	379.838	249.96
156.027	147.877	278.42
175.661	114.708	289.475
392.485	124.95	81.1846
206.308	198.114	173.222
163.048	149.873	237.336
173.144	96.6104	215.119
155.169	217.807	153.194
90.3588	201.939	635.107
292.854	243.018	93.1107
173.107	153.322	332.693
111.819	181.67	339.318
146.105	244.601	82.568
169.471	171.585	27.0268
277.455	219.605	285.49
98.5699	189.636	98.147
209.784	247.82	108.159
161.95	99.4589	5598.93
112.68	172.481	130.391
116.287	210.136	4382.06
158.395	66.2119	96.9733
92.9204	108.945	143.036
174.964	260.457	108.627
94.3191	112	234.169
87.0423	200.073	206.695
254.169	51.9716	96.4869
102.827	211.9	61.5574
329.355	191.817	3404.89
126.252	348.901	50403.9
240.388	318.027	32.0651
454.018	125.542	219.23
404.075	240.145	249.545
183.161	72.4671	139.314
306.64	165.506	281.235
182.814	234.28	68.8023
189.863	138.215	219.517
154.496	113.903	420.668
117.83	256.48	115.787
171.704	176.986	101.427
533.601	193.613	1933.75
119.079	123.328	321.675
139.632	236.219	410.432
215.905	87.2668	50403.9
158.798	250.226	234.54
279.315	145.909	316.158
184.271	373.609	917.273
242.689	438.058	1124.79
538.773	101.546	830.086
145.72	145.663	144.138
59.3941	183.136	977.538
146.714	116.487	9946.76
148.478	180.807	256.748
242.205	150.375	102.246
256.32	165.641	228.509
112.697	110.566	89.7016
95.1967	57.8827	245.441
279.345	176.719	526.906
153.882	181.044	798.654
161.987	319.636	242.954
120.379	138.239	1498.06
206.817	602.654	1700.87
261.944	170.257	230.02
170.346	188.625	31.0276
179.23	217.151	270.928
101.088	88.6094	120.833
234.129	115.521	151.575
149.566	166.218	50403.9
338.04	117.796	50403.9
198.821	400.329	290.718
185.192	129.843	564.008
162.45	150.748	63.643
190.501	96.1154	111.429
50.6291	170.537	349.473
135.199	94.2733	177.623
326.156	83.5381	128.079
172.136	121.058	97.4764
106.673	193.061	1492.44
272.883	203.995	113.874
149.648	202.145	303.305
335.98	133.979	273.561
405.562	97.9286	422.398
112.25	213.7	296.355
263.906	92.237	119.644
137.57	138.891	439.217
167.033	99.0866	81.6057
544.384	132.981	62.4228
315.213	145.257	325.756
155.011	177.941	50403.9
105.725	130.728	100.562
160.456	221.702	166.079
145.678	242.956	645.18
110.732	238.778	144.519
101.479	98.0865	130.608
120.003	138.566	72.8424
155.261	158.709	81.0199
116.352	152.869	149.13
39.8652	94.3507	180.052
231.205	158.221	198.229
180.419	87.9748	126.296
208.586	266.273	114.112
399.184	113.15	148.453
271.943	113.939	38.5008
518.182	118.371	473.103
286.458	288.511	1126.46
142.156	241.806	250.573
134.358	209.918	414.865
173.1	193.832	94.8349
140.728	110.728	301.576
361.983	125.748	39.4241
121.102	247.976	4124.61
248.821	136.417	171.018
78.6714	146.053	63.7844
116.148	159.45	3683.52
225.453	165.902	81.6824
172.661	121.659	253.912
336.827	103.229	126.295
149.814	142.733	1312.01
172.329	376.67	153.691
165.23	173.919	138.917
92.0466	103.347	456.831
232.351	91.4421	430.374
99.2387	227.584	4975.14
183.058	167.123	350.513
136.802	146.627	203.005
121.44	105.555	225.724
220.497	177.066	106.119
334.674	172.733	81.6582
91.6583	183.058	442.358
637.479	299.872	532.749
208.558	182.502	111.152
146.985	225.063	48.4689
82.9136	143.585	146.275
197.974	89.2086	1349.97
219.447	55.4162	127.526
147.783	205.166	81.5897
243.679	148.443	95.2785
131.2	102.652	132.893
195.712	128.608	351.854
199.665	139.346	355.207
98.06	213.931	357.048
87.6723	218.577	333.819
334.939	124.184	319.868
102.501	159.04	121.157
246.252	528.183	135.509
68.2767	139.535	71.5364
93.4341	130.442	558.418
141.696	188.382	201.912
532.51	73.1144	286.685
393.476	71.934	193.475
119.141	186.877	707.312
426.777	190.868	50403.9
228.819	250.528	106.771
225.71	220.026	547.994
97.3268	199.454	92.8427
305.08	66.7065	448.924
139.265	134.149	540.38
213.757	153.896	87.5876
145.148	205.922	1730.03
237.787	57.9628	707.822
305.466	322.792	1878.68
120.21	151.805	607.287
219.258	225.312	130.901
360.303	205.826	62.4066
364.358	82.171	151.823
167.218	151.812	244.619
343.731	187.118	259.495
234.489	409.93	115.554
149.635	345.777	493.358
210.138	128.459	84.6719
257.583	146.296	42.391
109.845	180.587	46.5042
156.53	271.595	143.89
176.115	176.709	82.918
164.928	146.489	1389.85
208.795	59.8928	502.266
209.874	107.094	62.9553
257.298	258.056	101.716
178.144	163.14	300.427
205.221	109.011	802.165
159.648	113.858	73.2005
209.577	252.983	343.269
296.121	193.807	50403.9
179.567	277.646	262.154
476.047	146.544	308.623
130.199	111.778	143.806
74.9935	156.473	707.42
189.349	148.627	123.04
179.339	152.559	50403.9
101.964	144.139	105.694
70.4893	150.525	259.375
138.824	110.353	190.058
112.891	346.767	309.224
161.802	211.137	63.0755
121.518	200.819	50403.9
250.283	219.119	78.9792
124.702	89.0139	173.955
576.877	89.2215	117.19
203.038	223.338	529.135
223.795	133.716	163.474
99.0292	323.764	84.7816
61.9185	153.206	43.6079
176.232	79.0421	372.961
235.257	123.923	149.454
80.8523	389.205	2614.91
122.776	177.535	92.5812
313.493	226.747	134.009
185.952	164.17	122.416
110.616	200.927	442.979
110.308	275.105	2170.21
112.212	160.517	336.537
207.395	103.273	594.564
259.651	149.015	80.4422
94.3579	143.46	2562.2
146.208	157.29	157.74
324.62	243.841	108.524
188.751	107.419	128.949
172.702	152.4	313.678
205.477	185.792	196.444
246.32	117.77	323.029
183.426	217.659	609.821
344.539	88.6791	123.974
265.725	245.973	130.014
370.369	180.446	617.841
142.022	131.063	213.244
80.5799	263.197	285.43
193.279	148.862	2768.12
164.735	230.795	334.384
132.574	198.648	207.103
168.173	233.292	136.415
123.152	98.4969	135.116
108.607	122.499	674.762
110.115	116.825	156.833
135.867	273.718	218.44
228.431	208.856	332.543
191.444	136.255	31.0569
189.418	116.219	50403.9
329.112	102.38	4836.66
109.675	184.467	3494.42
134.248	268.543	561.697
191.577	167.408	186.525
70.894	308.628	510.808
285.433	149.487	201.209
129.67	135.472	101.623
140.059	131.46	409.629
426.766	138.918	1637.8
176.034	106.32	91.6414
169.789	89.065	863.002
229.876	177.026	158.77
316.586	135.129	136.012
184.39	185.485	176.878
139.465	157.419	270.576
115.249	246.465	1753.38
220.93	160.24	152.483
181.104	386.608	280.745
171.259	150.103	641.217
276.304	75.0198	291.493
284.728	191.311	6237.72
136.771	280.326	118.682
162.44	91.0394	1027.25
177.625	141.186	1406.93
230.447	240.711	2653.62
190.804	138.832	130.221
146.957	165.564	73.1203
114.526	119.898	245.936
832.131	167.261	129.404
239.371	145.682	116.702
103.866	252.556	436.657
137.441	84.7344	2178.49
112.964	185.067	274.553
96.9438	483.468	554.677
93.4679	165.481	310.406
160.494	106.111	105.88
121.815	353.666	143.657
78.0365	223.929	256.838
115.361	132.003	142.308
150.628	76.8426	2802.24
152.164	284.703	987.381
166.829	184.723	118.771
172.151	197.14	302.851
164.352	139.545	939.061
426.021	144.413	80.8971
146.553	73.3365	302.856
167.352	219.849	308.933
304.088	110.234	59.9477
178.72	205.303	307.358
152.67	111.881	289.085
149.251	393.327	800.142
230.67	212.5	182.762
77.9505	144.392	1793.57
213.765	85.8765	453.855
160.767	154.318	73.9843
117.113	184.622	460.874
90.8983	273.549	128.685
159.369	194.835	1002.65
395.289	74.6118	44.2521
720.764	143.287	1314.42
186.772	375.188	351.14
171.146	89.882	58.5575
118.881	157.004	1539.32
517.718	181.728	764.174
227.368	282.969	48.4718
121.044	169.192	3425.59
122.539	178.144	137.394
161.735	93.9104	169.189
115.935	201.311	111.893
240.402	152.9	87.1612
131.077	101.854	77.1744
74.7875	247.724	115.724
161.012	149.014	40.737
188.557	233.454	181.412
268.41	124.335	1082.92
140.37	188.997	1052.88
265.796	141.897	46335.4
387.75	102.797	148.147
374.318	211.958	161.39
227.452	138.264	15181.9
96.5314	258.998	318.212
1108.43	232.355	446.325
205.575	289.435	69.5649
166.941	237.227	487.498
213.014	44.7081	112.473
282.194	96.9637	730.946
319.204	202.301	1445.23
278.492	252.727	179.273
164.553	165.954	67.593
548.41	216.705	2056.2
94.7297	125.139	418.561
157.156	390.189	311.686
55.0679	150.21	189.128
120.432	259.452	161.315
174.429	131.367	313.578
179.902	230.666	208.038
73.5799	156.175	82.9189
162.037	253.457	310.183
325.709	135.375	255.386
183.606	149.142	244.13
408.994	129.496	198.822
154.934	147.73	715.731
94.436	149.205	138.712
352.259	89.3957	378.717
502.767	220.825	245.324
163.562	201.581	777.179
148.95	127.14	975.104
93.3704	216.857	179.681
371.099	370.734	50403.9
180.038	185.665	772.695
174.193	228.431	173.66
159.542	101.091	1377.46
138.73	248.095	384.427
252.977	145.856	100.175
146.073	166.094	618.82
208.572	141.119	143.767
86.8035	161.731	691.42
175.36	145.553	222.4
367.419	109.406	76.592
321.598	220.687	361.272
123.146	185.51	504.152
166.793	150.278	125.937
228.371	193.706	149.593
117.125	282.426	386.333
221.92	158.699	2325.44
180.067	124.275	1316.36
442.698	242.346	112.252
177.99	169.785	2941.47
98.5917	177.403	240.705
212.518	117.402	1171.39
162.632	150.042	285.615
148.719	132.351	76.0544
209.138	132.718	200.457
213.11	197.107	548.35
218.77	140.598	153.627
100.567	158.167	193.172
168.948	122.526	27.4053
313.913	153.177	459.653
139.73	148.231	148.649
75.3392	311.056	333.212
150.57	127.699	805.572
157.113	144.798	3353.2
127.666	114.114	165.005
441.489	219.145	108.234
209.457	156.499	263.957
120.505	1307.91	418.287
177.592	138.623	212.548
259.618	150.337	245.824
241.813	77.3349	278.125
162.934	216.095	1119.03
235.5	192.144	422.053
117.037	208.754	151.553
167.954	134.272	2394.92
178.91	145.535	1428.24
200.438	251.598	227.973
116.974	312.795	93.7712
256.898	831.824	428.422
174.866	448.99	152.092
180.949	214.58	425.291
147.064	183.297	169.789
158.455	158.816	72.738
171.561	196.48	170.15
169.551	444.933	50403.9
86.8419	131.296	272.956
141.49	91.6034	138.505
359.709	172.604	100.939
237.442	131.671	300.701
188.229	94.4223	862.234
146.761	136.924	263.189
112.218	117.293	101.521
170.897	219.51	171.32
163.623	164.528	63.2778
128.036	130.141	103.172
99.1206	223.652	332.241
92.7755	188.551	110.611
308.703	127.975	275.033
236.932	211.277	1390.98
162.987	181.767	219.189
213.472	222.718	213.579
196.724	170.329	159.968
146.753	166.484	76.7993
126.787	268.587	188.135
123.731	210.988	58.6269
154.617	148.769	110.583
595.889	233.302	901.096
297.376	171.964	115.702
122.682	307.734	123.032
130.261	155.708	76.6528
147.259	168.271	100.225
88.3768	187.617	180.694
119.704	455.072	278.124
118.762	284.1	266.687
167.37	168.064	118.951
199.172	185.82	365.727
138.312	260.964	729.954
226.598	136.773	77.4289
146.342	72.8043	125.791
163.285	207.381	436.371
148.168	212.357	239.037
97.9067	132.28	231.153
192.553	212.908	468.364
220.831	148.256	107.643
258.873	308.346	142.245
216.679	126.998	281.095
211.538	103.187	324.317
121.238	168.828	249.081
208.248	174.053	573.49
282.573	137.408	290.356
165.404	129.802	214.785
162.52	266.573	152.156
83.4173	209.055	389.093
133.108	224.363	503220
105.9	499.163	174.625
136.1	345.237	137.489
138.961	272.056	105.644
79.9928	93.6938	492.03
655.299	156.42	90.6102
146.241	258.526	47.1299
218.122	151.51	160.076
216.564	135.68	50403.9
93.0218	144.553	208.887
215.36	203.397	157.469
154.497	145.598	545.022
126.255	131.433	67.262
173.979	88.6413	502.874
130.99	204.436	266.324
134.061	117.859	140.338
164.824	261.21	103.704
188.088	86.6556	50.1188
182.884	257.299	124.458
95.9181	94.1096	270.937
77.4492	111.095	229.131
252.365	151.986	912.013
99.8152	220.17	270.687
131.375	191.76	551.235
181.884	146.392	114.351
166.199	113.226	98.2756
77.4325	145.404	296.353
192.897	80.645	161.014
177.033	206.877	299.978
163.031	159.126	233.912
881.745	131.633	182.809
141.46	158.638	392.153
203.439	133.114	295.257
245.28	154.39	145.901
184.204	173.055	1493.94
267.138	124.131	117.494
123.198	122.468	4525.28
113.356	107.017	44.8421
125.17	242.493	61.0006
207.62	93.3178	286.439
236.815	136.741	173.837
178.59	151.592	196.593
133.095	60.7992	52.3207
238.463	206.138	179.941
176.578	209.641	67.8108
112.243	210.714	9107.74
253.9	89.454	60.7217
159.38	155.681	232.563
123.92	200.237	50403.9
135.149	233.842	260.471
172.779	304.094	553.863
322.871	239.151	102.538
130.439	147.614	46.596
339.661	364.635	92.0453
370.584	202.582	731.236
188.219	88.9719	269.01
75.8251	181.262	130.531
394.273	96.056	806.336
181.258	135.497	1888.98
185.172	215.437	234.924
548.259	144.137	207.748
168.312	198.747	102.59
207.558	81.3756	10009.9
158.272	146.097	185.385
112.63	83.7855	67.2772
99.9476	128.07	46.207
104.291	145.293	970.271
134.83	160.992	80.6142
153.622	670.129	91.7783
136.228	287.114	247.672
191.69	149.095	212.721
298.042	149.936	325.842
147.193	168.36	85.1317
370.742	246.74	66.9815
149.004	180.246	176.226
195.252	311.052	6562.72
97.7738	120.823	123.863
388.388	93.1543	31.7256
240.774	221.077	168.268
117.172	168.658	251.449
232.316	146.297	178.745
192.462	112.474	145.757
117.603	136.088	116.18
145.643	150.425	196.438
104.513	179.515	55.162
74.8714	189.717	20736.2
224.595	165.631	111.092
143.355	189.698	182.67
145.035	422.025	55.0422
151.674	142.515	39.2216
96.6901	111.7	138.647
262.168	89.0857	2013.38
111.155	262.124	702.265
258.649	197.021	92.521
143.113	158.319	1515.59
320.129	301.818	623.531
272.37	153.684	146.391
167.92	212.049	38.1997
142.234	142.864	114.172
135.389	185.17	116.438
244.108	208.989	2852.74
279.762	183.612	441.082
180.956	119.708	2536.55
166.582	127.115	81.0159
141.455	309.758	267.102
129.348	175.303	6212.78
160.856	310.529	73.8623
402.076	114.352	112.281
79.9376	124.672	434.639
122.445	184.353	121.057
196.673	170.56	121.774
93.1891	180.539	331.622
140.528	99.3747	64.0501
319.989	165.488	98.0454
261.504	104.246	157.32
110.417	144.845	406.51
217.246	211.455	104.297
288.56	126.739	113.39
259.348	355.356	393.235
413.048	148.826	86000.3
214.48	301.497	1651.08
228.461	159.215	245.514
246.762	212.014	4144.38
95.6448	140.553	673.099
118.319	107.673	58.8573
123.53	141.856	237.875
137.264	138.128	235.467
134.661	162.574	54.2503
220.441	64.9005	281.556
189.429	95.0788	231.438
199.311	161.149	81.9079
218.181	362.202	223.335
182.623	169.505	113.653
169.678	322.607	60.3599
101.497	216.517	341.308
130.399	198.44	1293.42
868.214	115.853	205.711
134.966	281.91	74.5501
140.189	181.584	357.594
132.779	289.232	126.015
174.939	118.224	246.838
456.56	227.451	189.539
314.412	718.329	1541.44
214.912	145.68	105.849
462.935	176.352	164.557
156.156	243.136	153.203
90.1415	99.5735	120.331
179.827	206.899	166.614
211.156	144.182	75.4067
217.092	121.61	210.996
122.462	199.785	74.9838
211.966	144.261	170.503
141.603	180.325	62.2312
103.865	264.028	81.2943
125.658	146.222	159.797
185.768	265.686	205.021
88.9756	151.402	88.2883
80.8936	205.081	207.616
180.995	164.611	115.143
86.3318	105.763	590.258
271.703	163.962	910.91
197.756	145.692	1105.46
156.647	342.652	281.838
221.956	92.7438	60.402
320.853	186.627	203.961
162.01	135.692	231.595
87.0753	141.713	349.542
163.848	193.172	97.1031
172.097	197.609	59.6955
154.968	147.155	103.416
110.102	217.436	151.353
112.464	204.56	50403.9
90.7532	134.883	131.082
222.318	152.27	170.775
118.812	109.57	605.227
77.5039	187.097	782.047
146.129	128.311	7456.11
214.379	157.563	57.8435
178.545	185.249	246.456
101.17	112.327	345.333
94.4746	180.039	14429
235.423	120.871	680.736
149.153	167.97	155.745
212.745	66.0259	130.533
193.03	140.418	58.5523
181.77	169.662	117.685
147.16	77.9208	306.514
251.754	156.173	461.314
156.327	249.384	237.597
124.015	211.351	390.031
130.481	164.066	108.933
154.081	194.751	255.793
119.412	95.7574	190.551
341.559	186.059	717.395
262.419	150.475	124.896
241.855	128.289	589.499
289.415	200.979	213.502
178.278	192.684	446.053
105.134	166.89	254.996
255.097	204.294	187.39
298.589	388.325	1132.6
129.897	258.832	87.6793
254.893	206.634	247.092
92.154	106.955	160.115
95.1338	77.7678	149.103
173.795	188.347	239.798
558.825	208.397	121.65
162.214	132.133	85.0544
241.398	131.865	436.978
209.683	200.48	257.808
200.013	245.795	76.0848
208.227	130.809	296.471
98.133	217.34	277.961
126.025	162.624	639.577
181.845	139.906	184.923
193.959	192.994	212.885
115.642	186.627	110.296
177.52	182.033	1334.07
146.436	108.512	138.234
110.305	154.207	187.035
199.509	225.293	204.516
176.204	201.277	203.688
134.209	188.906	129.758
198.175	117.013	188.817
178.592	133.566	7104.6
177.523	143.086	269.083
262.669	263.986	144.165
152.838	167.885	692.802
216.074	405.887	263.659
251.488	89.2723	221.768
188.002	117.486	82.4021
108.534	139.419	241.804
136.603	209.717	137.387
391.022	118.441	184.429
186.746	272.41	130.296
128.693	100.492	68.6765
153.292	145.737	265.436
357.554	374.175	131.21
266.824	125.994	1969.97
234.513	175.672	123.979
167.922	144.173	401.702
149.59	108.239	40.8989
158.997	179.009	306.029
122.106	276.746	113.029
189.149	150.01	627.43
102.862	161.461	241.791
95.2486	158.24	129.848
157.951	320.011	346.868
116.314	87.9566	44.7213
86.1052	130.664	1616.96
151.696	168.782	94.8825
310.601	307.206	449.458
296.273	230.409	176.061
96.9085	345.498	358.142
138.674	109.162	107.463
144.931	150.937	542.679
189.207	166.385	2122.02
125.709	144.539	88.1823
148.493	113.271	126.444
413.8	192.497	1512.66
153.881	351.651	82.5463
198.347	269.477	74.8592
205.016	183.687	188.092
228.794	82.5492	117.317
187.785	143.891	43.818
275.231	266.497	340.996
123.48	612.275	3232.5
146.548	492.94	433.344
294.883	171.511	221.371
397.859	96.3175	261.555
58.2525	253.342	647.605
128.99	163.827	195.657
126.551	207.119	358.488
103.905	135.879	130.356
166.694	444.947	451.075
253.273	287.709	248.418
221.39	153.126	217.094
120.968	194.713	83.1811
133.133	131.803	118.425
197.15	350.024	112.835
183.081	67.4971	124.423
85.6693	135.387	28357.4
189.521	160.65	155.794
159.798	195.201	100.047
132.793	188.668	160.065
179.842	128.807	50403.9
370.194	113.187	208.957
211.392	146.962	268.522
396.789	137.981	221.954
289.005	228.23	351.196
140.367	123.953	161.789
161.697	116.199	1148.72
224.933	157.709	174.495
99.235	191.26	337.244
260.476	144.068	49.6498
213.052	207.177	50403.9
222.881	193.45	93.8343
166.836	99.8498	176.964
287.352	455.536	196.315
137.632	227.829	353.904
110.918	67.0527	277.339
130.279	147.686	171.049
477.221	127.734	161.182
101.761	193.98	2228.09
205.468	117.155	306.412
100.785	126.03	171.407
75.8752	118.411	66.8556
305.565	87.2667	50403.9
115.607	374.396	355.893
161.155	138.102	447.373
130.33	143.276	66.9943
95.0618	197.203	2347.97
1055.48	182.75	112.361
312.246	119.935	61.7651
143.021	205.362	2689.73
118.478	282.507	141.899
147.99	170.992	344.555
273.943	155.885	290.537
181.31	222.855	76094.8
180.407	179.684	88.0972
221.205	164.29	26616.3
54.5803	189.07	176.9
202.049	192.98	248.917
387.794	172.786	118.732
225.533	220.939	660.115
94.0837	121.264	1338.39
88.7524	188.261	1310.74
169.263	181.302	40.4864
245.841	50.0161	150.341
247.561	214.535	387.455
205.326	230.283	3414.93
236.037	189.356	218.283
242.501	151.831	264.733
172.605	97.7561	250.849
263.794	365.769	163.726
107.44	99.1227	392.159
315.678	167.254	107.387
167.744	120.416	124.551
89.5852	431.022	597.746
171.413	142.666	68.0718
94.6499	192.431	418.138
244.209	229.197	171.425
169.862	155.213	135.48
87.5449	176.128	83.9087
171.498	151.023	264.214
229.774	1094.88	884.704
359.277	162.986	95.4501
142.663	234.158	106.724
77.4991	116.344	4377.54
187.898	162.444	953.678
125.765	235.158	332.821
222.398	340.344	71.8352
288.304	242.525	206.403
152.092	203.352	13128.1
160.637	673.955	262.278
284.682	378.637	131.622
130.353	88.3013	75.7621
257.846	125.762	551.655
117.234	126.466	5567.31
284.723	324.595	352.303
77.9278	120.157	253.339
154.504	129.045	50403.9
298.99	127.007	495.943
282.625	348.725	103.388
92.9566	438.881	3714.55
273.785	177.266	47.2873
310.708	191.405	253.903
96.4544	114.817	186.343
158.168	274.791	1225.05
590.768	121.129	147.872
219.235	323.302	675.188
104.793	139.416	197.483
99.8219	104.43	550.711
82.9938	94.1571	382.141
103.204	173.191	279.877
407.91	226.279	131.183
127.307	199.136	423.259
106.317	150.65	83.202
405.926	183.511	218.728
173.496	220.909	3891.27
92.924	99.8057	82.6415
134.919	181.159	236.601
338.952	533.911	177.364
193.309	221.656	315.243
182.316	318.373	87.981
233.617	327.678	79.1313
227.166	152.358	78.1333
103.304	140.745	56.8814
181.644	104.071	854.253
185.435	243.853	207.361
236.605	244.376	74.5792
195.107	215.452	231.922
262.665	78.0245	180.216
106.016	185.983	145.309
155.626	138.729	6121
229.44	108.784	1104.34
105.29	111.925	261.475
206.01	134.65	176.423
186.587	272.667	47.2258
125.383	83.0939	35.4093
211.64	95.9214	341.509
239.366	90.0141	68.0266
270.477	346.485	229.943
405.915	161.507	166.819
138.079	196.652	496.244
190.232	171.375	667.806
264.11	133.322	183.865
178.097	151.487	137.494
211.98	149.914	559.673
123.779	501.878	8276.48
194.316	234.163	712.945
110.289	295.821	86.1114
240.563	64.6028	1329.81
337.678	88.4218	61.1652
160.665	123.739	693.407
197.23	588.342	180.279
230.185	120.17	142.022
240.409	129.375	1009.82
233.442	127.859	165.332
289.956	158.613	111.657
84.8411	199.106	30.2109
205.602	74.2643	933.698
184.412	110.49	162.491
266.257	189.791	115.026
173.256	254.47	83.2689
74.8717	320.844	74.1107
459.36	240.224	229.589
424.974	129.476	73.1398
478.348	194.252	108.808
189.355	114.165	92.5399
236.897	75.6415	155.898
381.613	184.138	162.779
128.353	162.131	132.723
155.032	159.447	452.737
95.6724	146.701	148.092
168.335	181.341	268.273
221.99	131.005	63.5823
99.9546	155.862	2093.81
259.159	336.946	101.475
245.766	114.865	112.02
62.8808	117.683	34.4479
342.571	405.1	75.1191
88.1273	110.652	107.104
240.201	121.41	104.302
319.669	115.416	188.185
143.761	191.113	64.9111
259.857	133.882	143.95
88.7373	169.904	194.463
91.0754	192.673	75.2672
142.663	218.893	435.041
83.3379	228.398	193.482
133.918	199.806	1500.13
167.414	232.303	121.839
273.435	167.664	910.188
197.01	62.6882	124.629
148.343	282.491	1120.9
201.198	238.987	209.797
124.182	181.768	2343.07
164.615	162.874	36.6119
170.097	278.125	167.382
164.348	239.91	49.2252
205.231	222.301	127.355
160.624	157.387	189.493
255.611	100.148	659.105
103.858	108.927	272.585
98.6481	65.7015	233.117
54.5317	208.258	187.342
176.948	151.148	281.035
143.894	138.395	151.431
170.356	194.6	205.682
259.545	148.119	50403.9
348.359	125.822	103.974
295.816	120.763	12240.8
142.039	104.813	381.033
245.251	190.549	145.667
160.642	203.967	224.735
58.2723	239.958	1303.42
182.874	186.677	330.598
168.316	508.091	112.103
192.049	118.01	50403.9
67.9649	117.071	585.725
144.054	196.582	26.064
172.729	129.331	569.688
284.423	189.609	99.3705
80.1808	146.949	50.2503
198.99	127.667	232.719
180.296	78.242	501.954
128.317	101.96	299.775
281.839	105.555	102.818
162.427	94.9899	84.2655
159.616	165.193	56.8998
272.524	65.5087	2321.06
292.601	162.568	13110.1
116.961	183.893	125128
138.301	188.43	174.803
360.716	154.053	197.2
256.216	147.578	336.551
102.838	112.685	250.442
111.842	143.999	432.031
136.425	131.644	1792.45
149.085	135.307	98.0661
194.941	184.273	161.789
195.406	253.978	1233.7
66.0717	160.301	627.933
159.45	216.778	1306.46
298.965	220.012	69.4857
197.804	243.008	567.53
144.375	96.9727	112.864
181.118	208.045	344.38
251.902	150.985	60.7558
175.762	128.035	56.3392
175.047	611.644	126.695
248.525	91.0877	229.77
165.137	107.903	165.864
293.273	206.882	659.96
73.4139	391.684	899.19
147.518	104.509	280.43
250.03	100.785	102.608
412.387	80.6619	300.477
208.746	328.077	158.576
167.151	175.813	99.1218
232.644	102.338	366.057
136.199	98.8405	68.6972
549.193	399.324	74.9289
81.6341	188.792	123.614
251.877	114.514	156.212
318.468	107.344	3032.88
146.884	269.611	161.889
253.866	135.72	242.394
182.535	296.771	618.851
291.829	142.107	76.1511
99.8602	230.242	160.021
133.061	307.141	798.913
181.039	181.727	105
95.7919	169.496	100.579
114.896	135.029	80.2036
140.717	158.007	87.8335
138.098	597.314	152.801
92.6537	124.108	316.948
193.364	254.784	60.8659
97.0562	167.955	72.6139
104.366	216.185	31142
216.148	101.567	339.919
85.9608	251.846	266.64
67.7565	168.506	183.752
202.289	167.254	80.2083
189.676	115.352	613.04
128.118	92.8006	46.0873
120.187	126.208	365.736
163.108	211.957	89.6176
159.354	161.658	70.0508
277.158	227.481	1203910
127.568	137.698	190.524
226.792	146.789	108.873
134.473	412.474	410.409
[truncated: 6,159 more rows]

## Sheet: DOPC 
DOPC PL	DOPC PL with GTP	t=0
76.7549	320.743	136.777
270.33	430.091	131.397
218.277	228.146	223.332
158.669	147.549	158.745
143.08	265.892	163.144
144.728	129.864	122.126
231.618	187.173	155.282
157.864	121.841	220.626
137.263	155.792	110.883
278.465	103.54	237.543
265.013	212.032	83.0815
172.678	232.921	161.734
191.509	108.113	166.651
852.214	139.324	131.293
204.24	524.295	98.0818
307.641	179.116	174.369
211.356	365.806	170.89
132.449	196.103	259.793
201.978	173.879	215.198
264.42	98.5324	68.7529
201.849	119.849	189.291
243.413	235.554	138.858
123.806	648.063	156.928
230.884	205.542	60.8207
585.832	177.156	182.674
214.343	240.807	131.195
137.642	154.737	116.669
189.006	156.897	134.808
138.298	163.344	146.329
122.598	132.394	195.62
77.8054	129.788	108.825
123.516	133.904	187.134
99.8311	155.641	615.506
96.5933	117.432	262.035
180.539	354.692	188.874
275.412	152.131	223.812
226.172	268.429	231.673
126.616	162.814	155.713
214.687	58.4624	935.503
182.119	222.167	145.085
91.8686	209.702	117.983
162.488	131.728	111.808
149.167	156.815	92.7011
56.9344	80.3322	310.169
204.651	123.549	134.535
131.884	138.927	133.441
129.674	184.387	353.431
193.277	254.557	133.89
101.856	314.319	246.208
112.708	121.583	128.785
171.994	123.905	293.152
73.6836	103.733	141.791
107.76	125.616	697.956
80.1005	230.519	155.729
231.185	312.691	513.697
178.581	109.756	179.895
141.534	124.873	248.181
67.4362	167.178	143.523
146.138	100.839	374.64
111.946	361.146	108.404
124.779	242.317	216.431
97.0852	279.943	245.785
140.05	604.297	220.056
161.669	82.0417	168.355
245.716	173.636	194.89
271.411	101.568	137.899
106.843	104.483	159.038
150.275	168.619	106.697
143.107	171.554	134.486
83.2903	175.012	129.314
243.898	337.776	119.135
81.2756	220.707	311.975
86.5508	393.628	216.614
197.65	158.282	172.689
117.437	168.1	129.795
181.529	203.128	217.241
82.3446	209.93	93.1827
110.835	213.037	147.89
224.542	189.836	339.388
154.038	136.966	152.756
140.661	119.371	84.7131
110.764	195.732	96.0159
256.722	234.954	119.359
97.0599	494.094	183.443
209.167	182.299	212.365
176.852	177.213	360.577
140.313	164.796	139.862
103.921	97.6365	192.332
276.715	150.878	137.302
134.764	206.734	131.816
287.678	130.472	309.256
230.777	287.384	240.165
124.2	176.186	88.9881
229.215	169.541	111.114
122.16	157.522	200.906
321.851	127.116	166.322
170.937	381.454	86.3229
195.748	50.8223	99.5192
86.4288	172.043	126.574
135.454	80.8742	131.465
121.723	189.851	102.446
244.811	285.123	216.403
219.364	703.96	244.927
191.935	107.339	92.9251
274.737	215.44	189.457
171.542	107.725	184.874
128.974	179.518	93.4669
138.23	119.049	182.957
739.042	133.385	419.846
186.363	313.773	114.779
232.941	219.91	302.725
146.697	150.156	252.369
90.0512	114.154	144.42
306.235	99.0014	258.031
326.347	267.901	120.156
123.781	177.976	247.634
81.6042	145.863	173.826
83.7731	129.757	66.9776
206.077	135.632	185.788
180.659	244.504	182.575
83.6903	82.1355	88.8668
119.844	111.536	280.501
114.397	207.093	132.422
287.594	97.8199	209.045
104.089	234.53	111.056
168.289	173.37	268.377
138.657	161.178	185.24
148.03	68.293	147.705
149.183	89.5191	178.606
205.542	113.346	177.4
231.589	345.849	258.768
134.062	118.605	119.332
197.716	164.675	95.6953
183.554	278.017	162.03
98.5237	230.177	198.271
92.387	377.487	109.762
74.494	224.123	314.942
263.732	216.475	139.55
108.173	269.867	167.096
105.169	216.264	208.676
216.903	146.9	219.444
161.771	169.173	201.395
172.989	208.387	247.052
202.493	143.035	241.382
233.111	75.1225	146.659
218.165	184.333	182.51
155.824	108.083	207.392
125.94	215.423	190.141
207.796	96.1425	133.135
91.9356	127.015	111.054
71.3483	199.256	207.116
422.417	230.789	117.394
179.757	246.965	222.938
77.948	73.5034	148.816
193.254	264.876	154.243
157.065	173.093	181.057
439.744	68.05	1530.21
84.0284	48.23	432.717
750.413	166.009	196.084
126.704	144.499	189.077
94.6282	162.04	193.267
147.241	233.601	540.723
162.671	144.971	331.442
222.759	190.463	103.545
117.969	201.421	237.976
181.81	144.195	122.61
86.3787	212.687	110.837
225.592	70.5487	411.126
160.097	89.7258	168.953
287.708	162.939	83.9569
114.012	181.304	166.787
272.855	247.004	123.99
128.42	416.948	144.862
71.8625	176.564	120.533
133.849	91.1492	198.927
291.853	385.449	196.119
436.779	243.206	212.415
104.151	372.957	291.883
83.3506	263.21	380.611
135.152	172.244	98.9145
126.093	888.867	151.225
109.807	110.41	91.4402
184.134	128.934	150.2
209.766	220.682	176.948
209.902	187.235	170.395
194.201	424.606	189.559
102.877	180.843	119.542
119.648	193.635	171.031
127.035	81.3232	204.771
155.598	124.14	298.209
121.039	138.925	105.005
233.159	233.472	213.162
175.2	195.37	347.783
151.343	523.184	139.334
167.173	157.047	286.511
129.919	100.44	81.313
123.941	112.737	99.3484
305.192	176.545	387.473
499.962	101.097	167.791
177.839	178.478	221.394
97.239	218.143	110.907
123.593	231.678	142.519
98.0659	166.075	153.798
168.208	148.574	212.9
124.957	429.234	254.377
139.364	361.375	238.753
202.424	133.652	155.167
293.267	163.209	256.983
473.45	608.04	90.6286
152.309	266.451	276.071
111.789	119.702	106.478
216.961	186.996	247.201
62.8282	168.689	110.983
107.138	262.935	106.478
185.892	86.4134	214.459
233.702	174.543	151.677
134.208	270.585	210.395
108.598	117.358	157.107
104.68	129.206	159.8
167.801	219.672	165.134
194.781	161.929	254.141
201.156	104.445	149.966
87.8245	228.605	155.161
195.166	223.25	153.954
194.292	147.32	184.987
119.543	182.653	167.843
302.94	146.461	133.187
110.244	212.792	184.204
307.508	220.874	201.191
136.406	132.737	99.2885
177.069	184.373	120.557
53.9566	180.647	125.94
175.096	292.586	191.397
141.571	144.733	163.533
169.677	202.574	327.665
212.131	195.625	156.348
147.103	367.478	80.1302
120.106	145.106	131.983
193.55	371.254	163.183
251.495	217.536	214.253
135.486	301.03	185.927
177.906	143.39	122.854
121.807	233.634	289.325
224.392	151.367	193.456
146.656	117.111	185.328
154.41	277.305	81.6889
150.682	159.004	140.119
316.554	93.9414	143.879
160.809	71.7753	207.985
269.385	186.703	173.18
176.188	132.724	169.875
128.97	144.392	131.648
63.5632	231.441	178.238
294.872	169.292	218.498
162.396	85.4426	264.687
153.819	207.057	633.465
114.166	129.217	193.706
266.449	201.865	172.145
131.286	170.33	181.696
117.828	232.032	252.567
226.063	134.129	115.317
90.414	207.276	124.784
160.304	167.597	131.467
168.944	162.79	106.532
105.242	129.01	199.149
130.583	128.756	143.445
94.6003	523.622	176.102
141.664	217.146	155.352
160.026	119.414	91.5716
396.096	355.651	111.862
124.654	379.618	207.299
138.898	105.016	153.346
186.406	247.242	189.988
123.095	93.269	194.868
353.265	72.7963	142.68
113.985	98.2717	121.447
433.148	124.238	151.964
182.197	225.027	130.604
189.65	140.508	172.565
190.582	81.8823	127.572
181.488	98.7288	173.947
186.809	225.034	244.901
154.713	183.466	235.009
123.027	127.018	84.0602
226.959	127.153	243.412
120.736	167.868	94.3989
174.809	239.092	281.543
146.45	252.518	193.402
179.67	140.687	487.855
111.666	152.95	199.101
189.105	142.627	222.947
105.314	124.582	139.123
290.508	148.025	91.2765
103.957	121.453	248.621
178.006	246.742	206.071
181.17	211.976	667.125
143.895	147.996	52.1928
66.1036	275.559	122.72
158.833	205.37	180.799
160.175	161.565	240.154
193.813	313.995	264.798
130.442	299.76	152.941
153.297	185.046	137.079
188.907	106.475	233.402
166.567	199.799	325.103
227.203	183.794	194.538
86.3042	204.061	81.4325
113.557	133.74	83.3818
183.07	158.24	258.707
144.95	81.2464	104.913
419.737	121.273	177.214
301.48	185.629	142.92
156.831	320.381	95.7844
135.242	128.207	103.509
167.044	236.957	111.057
250.509	408.424	216.325
123.817	214.603	150.679
256.745	156.608	182.467
143.203	164.278	81.3272
246.825	158.018	190.751
126.353	192.589	197.938
165.979	141.568	310.501
163.364	95.0975	143.246
152.718	188.434	203.818
201.54	105.83	133.923
211.97	356.335	119.472
120.176	155.354	101.897
99.0752	106.654	162.503
146.369	169.325	171.323
87.4691	195.157	100.397
114.815	79.86	203.328
209.639	134.372	208.687
126.118	77.7659	284.73
236.702	135.701	103.837
150.153	228.124	92.1374
93.4586	210.379	213.888
165.459	144.602	63.2542
320.271	164.191	257.772
191.887	165.394	256.791
210.5	148.608	112.136
108.65	153.708	88.5377
69.0559	123.346	198.231
241.335	156.18	132.662
104.951	498.394	190.515
98.7817	154.315	218.193
132.195	201.225	380.944
152.045	140.006	208.172
232.68	78.1181	181.545
108.969	184.558	173.077
281.891	142.076	172.947
223.695	88.1287	141.659
132.205	128.105	190.456
260.225	150.757	133.733
239.412	162.871	99.473
160.033	143.646	101.324
133.191	148.434	149.648
206.456	153.62	131.861
178.348	134.355	154.562
142.095	165.864	263.494
142.033	197.862	128.671
215.598	97.528	227.946
219.544	191.016	167.516
311.459	295.329	226.135
272.378	338.61	159.356
216.351	353.301	73.2429
97.9754	408.561	272.341
362.608	191.769	164.003
173.278	165.057	105.691
242.482	94.6796	205.302
260.735	221.679	69.5671
115.692	195.167	144.746
170.091	116.574	288.248
177.677	182.157	169.974
189.609	217.267	286.239
204.579	207.57	141.63
129.738	113.106	112.451
188.546	104.098	75.5396
118.36	220.655	108.881
162.303	165.866	156.496
233.531	121.742	127.223
192.108	85.7384	82.1245
178.908	197.79	118.234
299.406	137.24	114.813
183.155	250.17	151.602
179.121	286.703	472.335
465.75	202.472	138.034
329.135	207.959	116.417
272.214	203.239	246.381
107.583	112.712	107.777
66.7911	110.072	134.68
90.1703	188.44	211.017
72.3142	109.164	128.682
191.353	152.867	289.929
108.742	340.835	258.374
107.044	56.5505	185.15
161.523	93.0382	225.693
77.8032	141.653	163.793
163.151	214.477	213.252
223.632	146.509	108.262
281.546	223.12	149.576
189.02	114.704	108.985
124.969	146.096	281.371
189.196	183.327	169.939
172.961	120.868	313.932
167.292	229.163	219.676
195.938	97.2339	278.446
118.063	163.404	356.582
207.147	99.5725	261.04
130.569	251.325	122.561
129.374	143.444	223.204
209.42	114.032	250.008
207.154	157.55	139.849
128.506	192.694	156.372
109.209	270.911	107.165
155.019	178.109	129.045
129.491	121.509	177.808
422.439	409.124	613.434
180.216	149.033	168.987
209.752	184.244	236.48
174.194	342.439	150.659
195.644	154.794	128.38
176.544	155.732	145.917
75.1805	183.951	131.078
246.133	136.792	192.277
261.296	171.904	154.128
87.8066	109.935	70.5365
205.459	111.676	133.846
80.6913	166.467	257.513
115.997	131.757	187.698
127.71	169.241	144.937
122.324	165.953	138.162
166.245	259.651	200.781
183.816	267.857	139.516
167.022	219.865	96.5878
159.74	98.3453	103.295
197.307	133.162	256.404
186.976	317.206	205.781
102.544	101.611	505.995
131.291	269.459	177.397
250.467	228.657	93.5573
127.32	148.179	183.165
214.028	135.115	123.198
181.641	92.813	125.442
277.975	159.498	89.9682
224.783	168.038	163.236
118.482	271.739	206.458
168.011	173.464	134.652
165.365	97.8516	86.4214
323.082	142.595	161.088
157.625	249.817	215.347
139.547	235.472	239.543
202.338	238.532	181.163
161.492	181.363	207.369
43.2766	159.813	406.001
130.86	129.392	159.663
232.064	108.224	99.1624
106.478	352.358	152.949
182.409	149.942	289.161
113.546	157.391	96.6154
93.7701	104.709	54.0343
325.65	169.54	157.549
187.977	128.945	190.619
91.2665	177.548	150.985
188.087	181.544	221.183
120.684	160.043	178.113
221.159	157.03	174.507
193.571	185.265	106.535
131.164	117.83	273.198
138.888	183.112	161.442
84.6165	190.066	233.532
117.932	192.004	567.359
197.784	95.7517	107.669
186.627	99.6624	1611.52
157.963	132.133	179.007
178.276	84.8165	155.409
172.502	224.072	158.636
290.643	146.576	71.4307
154.336	136.257	148
188.353	337.039	294.866
574.492	155.788	292.929
219.023	130.212	103.413
119.162	285.642	121.499
1035.78	150.424	114.181
103.76	256.138	363.363
130.584	96.23	115.616
168.751	82.1992	223.601
207.674	248.429	161.918
200.254	190.572	134.427
130.871	352.612	68.4837
118.301	200.307	126.452
106.972	290.841	200.46
514.832	157.87	119.319
122.539	163.223	162.444
126.949	220.031	73.5513
110.189	237.654	131.098
179.39	270.313	170.142
211.272	117.58	94.8924
200.329	195.484	142.854
227.872	103.391	254.307
133.178	154.377	351.307
176.375	125.819	104.839
164.844	351.66	277.456
449.308	141.468	212.984
95.4609	295.453	124.598
156.743	235.774	135.098
115.906	194.698	167.369
84.0624	269.353	125.751
65.7978	154.844	176.571
113.569	151.59	267.404
235.627	146.124	149.561
196.063	203.269	171.541
145.798	166.216	105.291
173.341	136.927	168.903
110.503	56.1839	218.075
126.585	220.031	284.923
209.403	204.029	236.845
215.929	133.79	236.619
132.244	258.059	133.545
151.15	204.595	166.243
181.85	212.49	117.964
151.577	338.11	809.176
149.079	118.309	180.809
216.098	150.102	218.996
152.682	209.772	189.475
160.117	275.15	214.919
242.457	143.213	157.539
211.705	290.667	302.504
184.87	255.133	367.931
192.991	111.405	93.4052
97.9432	685.513	82.4756
190.058	173.679	142.1
276.829	158.261	271.317
197.07	417.617	237.813
151.437	185.253	115.072
693.521	135.028	379.633
148.192	162.967	132.594
234.952	104.302	850.395
235.778	272.92	205.05
122.372	337.288	215.291
244.481	265.029	99.269
232.808	208.686	122.545
360.58	178.021	194.64
186.203	186.287	76.5317
261.723	153.488	166.851
230.937	411.694	73.0445
158.262	166.52	228.467
194.605	167.602	188.606
100.945	306.136	179.556
59.5204	195.364	166.208
101.49	57.4595	180.951
113.126	255.66	186.495
364.803	142.879	156.926
400.62	183.966	194.053
170.715	118.787	344.427
98.372	223.405	125.536
125.215	166.671	94.7969
273.49	120.631	166.212
192.565	162.815	81.0455
185.81	619.98	147.857
154.883	213.81	631.086
259.299	151.688	112.8
187.203	93.9524	148.741
91.7675	75.206	191.033
191.095	195.378	115.317
259.291	200.596	156.65
211.606	119.897	255.553
486	158.636	92.2693
212.685	170.794	86.9818
89.5182	133.305	119.187
152.372	205.894	139.083
239.711	172.057	134.963
151.975	215.502	162.305
164.013	181.693	120.014
122.539	260.881	101.616
144.92	220.574	156.746
176.218	89.0849	107.918
134.857	140.608	200.418
209.891	194.491	180.402
119.309	65.4794	147.357
123.303	173.104	131.995
158.18	138.969	88.7596
106.168	195.336	152.51
88.771	123.725	212.897
104.371	141.512	316.703
142.501	124.21	89.3485
261.463	131.74	385.153
186.434	91.5751	431.368
171.342	224.127	127.203
133.669	214.063	173.965
148.69	200.512	84.4366
127.051	440.486	187.066
131.939	328.486	211.01
271.662	215.871	282.389
133.507	142.544	156.112
190.074	212.712	156.177
141.177	299.338	187.266
172.146	91.4269	151.056
119.69	168.688	158.443
196.148	99.7476	169.058
297.703	119.517	190.244
194.485	249.188	219.739
150.794	96.1058	146.801
204.219	169.165	191.843
256.931	74.8466	146.064
516.903	228.86	118.839
167.116	202.328	296.505
157.158	190.418	83.1503
80.9712	163.703	112.11
79.1069	175.969	180.168
211.437	117.422	140.372
210.864	199.228	130.242
128.903	137.858	233.072
260.149	126.284	116.757
63.1434	103.17	134.15
213.975	57.3864	99.3114
102.745	233.342	207.716
135.377	174.555	118.947
131.61	304.259	158.686
153.156	138.963	191.709
101.465	108.824	93.538
123.373	118.323	136.235
148.412	152.282	144.788
120.956	89.5875	113.183
184.274	111.296	273.844
301.061	163.063	371.4
107.275	183.842	369.34
88.7821	281.12	166.242
238.622	105.229	426.627
128.255	128.419	185.667
178.439	147.574	199.82
266.536	61.381	146.104
149.996	180.852	129.811
97.9466	117.537	78.4007
136.516	146.431	136.926
198.266	85.1827	217.762
250.154	195.846	173.367
218.774	120.437	296.789
90.9912	356.742	173.799
417.915	359.038	283.78
99.7876	162.338	151.922
110.811	236.58	258.82
157.265	240.469	87.0697
271.625	146.918	115.063
207.285	143.723	184.881
110.782	281.709	112.497
150.768	188.434	226.058
434.198	161.551	140.027
139.316	122.562	120.792
188.836	203.385	474.076
142.378	171.497	325.547
332.156	161.194	163.57
206.017	307.778	166.747
204.659	315.098	137.933
128.045	249.432	131.975
127.202	192.42	171.246
198.099	186.224	247.887
98.3628	154.857	239.317
279.09	129.61	89.5527
106.903	168.632	100.643
83.8173	194.147	162.444
206.817	166.516	153.623
146.372	205.524	262.33
225.03	142.881	198.162
318.36	242.227	89.3193
152.558	194.154	103.605
145.188	198.418	169.583
247.227	282.665	245.008
91.9816	151.79	141.477
137.817	256.091	222.252
276.482	148.175	362.889
214.362	128.856	299.512
152.274	180.738	87.9946
229.495	137.047	197.716
213.968	106.843	173.429
193.308	147.221	413.965
243.403	83.9523	214.06
201.316	177.423	171.355
195.051	181.278	132.074
277.786	345.663	124.119
296.431	127.462	116.338
123.751	176.417	302.245
173.313	130.471	139.785
76.4213	161.248	136.986
713.258	217.273	271.243
99.9636	246.667	134.04
211.504	177.958	242.322
145.055	175.6	178.738
174.231	239.242	231.524
144.963	149.3	103.7
83.6297	193.339	103.006
211.16	154.747	447.656
382.91	863.37	146.663
202.509	211.664	157.066
201.186	134.556	234.523
223.293	161.355	164.81
204.427	147.024	246.986
122.949	150.103	268.405
175.533	177.619	122.137
224.313	80.8799	257.332
147.019	189.152	266.3
130.018	200.357	196.997
97.3518	166.838	150.199
111.68	332.28	212.285
96.9701	178.095	150.506
136.259	241.323	185.062
185.493	147.052	234.445
183.505	187.74	139.94
107.558	124.536	89.1723
108.907	231.602	131.087
165.85	145.849	199.573
195.659	89.3238	191.745
95.1403	225.269	331.232
1272.41	209.191	169.126
178.114	253.176	163.616
234.406	134.478	107.666
256.955	99.7754	164.465
288.943	113.652	138.52
106.424	135.775	167.531
220.589	177.756	293.629
173.073	155.204	148.61
103.272	105.021	131.054
290.878	182.454	118.051
86.1832	84.9582	317.651
283.445	196.92	184.119
88.5664	136.95	115.193
210.022	178.349	116.372
147.569	178.178	387.971
69.9833	199.918	229.87
126.864	238.178	286.094
111.372	129.631	218.448
133.32	312.072	169.69
237.098	450.093	125.535
242.853	345.253	63.0327
545.646	169.219	430.713
80.4015	211.641	340.083
99.553	111.975	121.909
162.281	111.53	258.299
132.317	269.681	84.7054
211.687	86.8074	675.987
198.751	251.927	216.69
118.09	234.903	201.549
172.112	101.599	156.452
150.292	660.136	360.966
168.616	169.018	602.045
148.424	265.049	238.896
117.156	240.877	138.209
192.089	269.652	187.261
257.984	196.876	106.649
427.727	104.437	142.085
205.768	135.47	129.753
205.385	187.488	134.423
107.689	108.385	212.042
162.105	135.02	185.368
95.8111	88.8909	212.854
216.179	224.826	161.54
194.277	183.618	128
198.639	138.738	198.608
280.53	166.372	144.857
127.371	115.503	157.041
145.401	384.374	120.956
211.621	138.935	94.1883
125.702	309.06	173.979
410.428	131.983	129.971
127.95	137.077	178.592
163.773	87.4036	134.766
93.3941	104.207	229.472
171.025	78.1491	171.462
101.798	259.551	126.203
206.343	138.003	103.346
112.664	221.286	127.748
407.151	116.438	152.395
128.645	214.842	113.879
191.473	187.693	200.826
188.435	127.329	137.73
124.624	155.417	424.474
149.674	123.624	118.096
136.264	144.668	139.999
232.609	134.508	852.966
268.955	225.111	238.115
136.196	195.562	72.6759
91.6514	192.465	153.023
146.87	174.222	113.001
156.986	150.837	100.363
202.996	134.639	180.178
234.968	183.663	114.116
113.124	189.735	175.552
144.512	212.882	72.5635
184.613	180.958	167.7
158.523	99.0166	248.782
96.3929	293.869	206.931
155.684	458.143	141.521
134.065	307.102	153.572
194.157	84.7547	243.933
122.35	292.234	256.338
160.011	232.203	231.075
165.417	241.126	248.782
311.327	198.515	167.721
284.772	231.381	202.216
103.486	191.3	145.994
136.944	128.556	210.659
168.567	176.299	199.976
171.956	267.542	124.9
103.411	377.844	285.34
155.682	75.9187	135.354
138.403	417.661	178.011
163.682	138.56	131.927
139.564	437.601	93.2553
106.098	64.9981	177.761
289.368	149.987	106.583
165.174	297.827	89.3515
149.038	188.987	173.76
190.776	128.215	153.133
207.121	137.223	116.661
223.705	157.02	112.163
119.663	132.348	213.261
114.912	105.357	235.553
169.402	111.651	216.158
146.314	195.181	176.866
225.384	93.3239	190.747
140.79	187.096	249.304
182.769	292.84	341.256
147.771	99.3817	103.525
122.658	56.2358	161.407
176.888	142.55	195.621
198.349	234.021	171.248
107.77	128.419	115.203
198.152	77.2286	153.263
108.493	169.042	173.712
119.646	347.162	128.28
413.867	586.137	231.29
108.697	303.723	184.413
147.312	170.009	152.448
153.979	270.22	184.501
209.732	171.3	248.589
157.664	214.715	152.976
199.462	215.872	245.764
99.252	135.265	253.137
136.535	158.928	99.5937
187.652	80.7465	207.237
84.1636	112.017	388.68
175.842	125.329	195.213
154.219	265.114	135.274
465.983	210.911	135.814
181.586	86.1704	193.483
200.669	134.633	95.248
194.577	202.66	170.534
85.3203	474.277	181.033
96.4205	137.759	196.221
186.005	96.9716	275.028
89.6312	122.802	236.537
102.805	113.559	164.888
133.655	143.195	145.244
212.148	205.164	134.454
563.229	125.017	218.356
74.2078	128.739	213.135
161.633	171.481	73.1206
298.847	219.214	157.392
110.187	269.633	93.2095
131.746	269.667	86.6343
215.844	114.632	132.602
122.667	139.153	94.8725
167.599	256.781	199.073
103.78	234.851	204.128
191.716	130.79	118.038
240.155	121.098	184.291
200.948	207.34	140.032
193.153	189.272	154.622
99.109	128.856	237.131
225.227	103.4	1623.42
184.606	192.091	216.211
197.374	58.4223	188.228
287.396	141.77	80.1739
422.58	355.081	82.2773
141.753	271.325	126.586
302.219	119.224	157.047
125.707	162.558	192.091
146.419	210.835	154.305
70.7282	158.502	166.569
151.856	216.701	150.169
181.254	242.629	220.268
141.587	162.449	228.449
204.715	190.335	95.6367
151.615	221.549	215.084
191.457	160.574	128.004
203.541	283.998	135.682
66.1606	162.073	247.318
98.5391	81.9563	189.564
130.108	121.934	89.5721
156.544	89.5782	68.5582
174.185	64.8915	160.488
156.29	313.094	220.587
133.493	151.818	405.986
132	200.846	182.115
142.815	139.762	101.844
118.877	51.0982	112.221
132.989	195.568	93.587
214.808	210.061	247.99
190.558	206.496	155.562
205.276	161.309	223.307
165.036	107.223	230.762
73.3168	289.617	105.983
173.565	400.023	196.593
134.745	527.372	331.309
104.472	270.555	109.672
174.318	181.857	192.503
124.909	126.415	585.566
200.462	153.008	111.94
444.772	270.173	160.879
219.865	257.671	177.545
90.7693	213.519	223.38
248.305	196.907	115.911
70.77	158.86	174.133
141.756	303.66	171.436
169.266	129.124	622.085
191.581	322.415	241.682
246.207	154.19	133.36
101.901	157.374	250.55
108.009	126.909	67.1596
179.597	201.645	73.8304
77.955	194.833	77.1274
369.019	295.226	287.891
215.527	197.347	271.048
183.796	491.521	711.744
198.654	180.621	92.6138
169.997	245.016	201.432
146.779	129.848	106.38
226.037	85.1842	102.71
106.878	199.625	145.028
126.645	159.485	155.007
229.001	114.75	82.5174
130.679	169.431	223.511
164.503	178.051	162.436
162.912	148.834	131.437
427.61	126.6	246.043
125.837	275.834	222.077
103.757	331.133	200.187
207.221	194.285	130.159
215.582	80.9661	202.536
228.163	454.682	598.104
168.157	264.658	190.435
233.413	124.427	241.301
119.346	129.168	319.419
160.49	209.926	185.57
144.147	87.4021	149.732
155.329	183.105	117.635
219.557	101.367	194.321
118.33	44.5931	189.447
142.064	173.765	51.2796
176.897	154.185	125.89
183.148	608.269	198.446
85.9271	161.205	202.053
94.5098	235.892	114.952
245.608	285.385	261.045
143.23	236.624	196.838
186.966	237.375	151.563
102.67	292.82	141.677
180.812	84.2134	105.755
130.74	213.816	220.963
518.518	175.159	93.3034
289.201	131.552	177.962
137.398	430.98	249.843
186.816	192.142	141.857
241.801	170.306	60.1201
287.275	234.95	319.944
161.575	355.833	106.034
253.681	204.329	239.89
89.7566	122.243	193.078
329.268	189.021	135.179
125.902	201.47	177.461
91.3814	108.575	140.815
123.394	229.051	212.97
158.707	113.965	131.694
152.283	170.798	415.268
150.524	152.855	226.27
656.832	237.08	268.16
135.324	181.481	242.445
87.3466	94.484	194.427
94.2786	75.885	169.915
145.572	155.337	173.968
152.347	212.575	139.748
288.695	184.006	117.775
218.645	202.514	205.782
118.937	618.321	94.7396
196.568	187.567	252.973
203.481	128.367	506.583
134.279	66.9082	143.157
116.492	219.204	295.016
151.279	118.933	93.5199
154.258	122.151	176.133
246.213	148.778	176.974
181.247	118.962	132.05
134.765	224.642	96.4671
103.67	68.0831	184.541
133.996	145.682	111.426
108.129	105.501	127.282
199.692	278.631	168.118
106.334	164.325	193.413
114.738	251.35	165.868
132.55	203.889	62.9495
143.033	78.9075	281.861
236.321	288.151	154.464
177.067	187.82	227.548
124.595	104.553	119.787
386.244	124.31	266.149
262.379	189.325	124.987
74.8416	162.756	193.512
113.063	239.572	128.985
162.44	128.096	210.058
148.247	158.22	115.187
154.439	217.659	188.305
107.86	180.501	160.951
310.897	170.037	173.457
135.219	269.883	801.934
193.568	206.704	1241.25
123.476	171.733	313.474
167.955	152.971	268.105
153.582	174.56	342.335
156.148	180.902	189.381
369.488	267.611	203.013
256.124	223.992	145.667
186.447	170.677	151.02
110.602	208.636	186.991
145.249	145.024	172.823
271.975	103.535	135.453
109.01	323.473	183.511
159.076	179.471	93.0756
138.73	250.843	122.258
248.701	132.238	116.691
175.752	205.76	141.012
134.782	257.355	110.176
151.069	137.269	269.2
212.844	378.068	149.327
181.63	165.003	997.365
135.778	442.835	145.327
156.189	76.7207	188.972
734.226	119.99	382.039
175.917	172.964	136.812
86.5057	145.341	103.787
103.566	153.72	162.173
85.7853	218.188	171.152
135.08	163.517	112.889
350.442	116.929	222.627
150.508	126.219	240.729
151.735	208.943	115.295
140.967	260.795	138.435
102.392	145.646	90.0552
114.551	153.512	242.727
114.573	270.986	391.619
188.774	253.564	172.661
151.025	415.543	294.65
335.467	79.947	143.619
174.221	294.97	80.4251
174.817	266.225	209.901
233.284	181.256	145.21
117.972	181.299	88.9364
111.131	223.261	48.56
424.831	356.65	153.902
184.332	89.7605	200.005
159.872	224.989	131.4
167.886	100.393	169.922
110.683	222.294	175.529
140.214	246.905	126.524
188.487	136.914	781.308
254.968	190.081	120.575
132.868	244.835	206.184
109.333	136.192	148.611
206.235	403.959	80.1373
80.1951	172.77	179.935
544.889	111.815	868.424
140.625	195.022	124.208
719.957	285.884	141.553
136.152	117.442	128.329
294.581	117.377	74.5495
86.7868	153.606	472.359
185.142	244.406	229.936
185.049	376.735	264.311
187.488	120.86	135.401
182.666	129.311	198.147
125.37	185.738	217.724
166.187	147.483	887.778
85.0216	179.818	183.238
224.802	259.224	278.505
207.194	124.862	125.439
171.969	492.298	223.48
153.861	194.612	108.013
133.389	179.315	92.5286
135.904	96.0742	169.21
141.793	377.142	106.436
189.105	107.29	131.22
187.43	102.578	142.034
204.504	138.518	163.185
175.746	125.924	182.445
127.685	154.181	174.676
111.998	131.709	148.212
182.145	175.486	270.342
105.154	337.527	125
113.335	210.108	129.399
113.465	273.539	130.523
186.201	768.492	266.412
142.003	198.526	216.426
273.935	102.432	123.707
131.607	225.279	144.781
215.707	209.32	93.7499
199.655	263.695	91.3682
94.764	137.494	152.541
163.626	156.479	118.488
223.55	259.912	52.7438
152.589	140.261	211.979
124.514	218.683	229.163
120.717	99.6759	276.179
191.833	173.97	171.406
206.375	92.7871	197.46
187.242	142.11	253.029
134.421	86.0145	101.738
130.34	207.55	216.595
944.024	124.673	96.7367
176.828	158.912	147.324
97.2564	199.547	101.029
138.846	66.6576	127.229
93.9707	229.08	159.165
194.708	180.248	81.6171
210.277	123.875	146.808
307.477	147.459	181.436
221.319	196.26	305.171
133.742	186.87	123.069
142.198	219.712	117.208
153.844	155.796	113.804
118.143	265.95	97.269
152.508	152.664	196.923
157.856	138.233	77.5709
202.921	81.025	206.428
91.0114	210.068	118.824
93.2745	161.57	137.41
386.072	152.221	150.042
121.956	1235.11	88.6833
178.785	224.006	164.515
167.143	132.375	84.7498
174.932	96.8841	60.5826
120.511	289.293	135.79
189.183	143.944	142.187
157.117	159.173	297.652
130.639	194.159	233.965
196.825	137.286	669.334
208.013	134.769	106.011
202.033	146.65	87.272
324.356	158.307	318.596
66.513	192.902	172.186
149.839	212.829	301.612
143.602	126.44	141.675
195.492	151.757	330.355
133.024	114.757	148.388
196.604	248.081	146.081
134.821	217.484	115.766
94.5842	187.989	296.163
111.914	133.278	985.827
111.984	163.531	83.6496
170.642	169.67	298.581
182.299	174.102	290.902
125.371	311.014	452.548
117.08	194.772	191.415
284.115	206.634	185.163
202.884	313.24	302.381
76.8524	171.292	243.475
146.526	187.733	94.9396
150.027	129.245	373.67
157.511	290.953	184.849
260.167	212.917	95.0476
76.1219	90.1309	136.67
72.5436	291.332	83.7608
1699.33	175.83	317.632
267.939	161.537	201.332
101.837	99.4869	207.926
379.705	180.611	245.428
90.2393	245.63	210.973
159.51	167.739	121.17
195.312	197.714	210.137
99.1852	182.868	165.708
145.776	165.779	108.144
205.985	184.385	198.984
182.047	224.269	252.347
153.145	164.465	223.895
117.65	245.831	185.283
149.011	182.646	119.195
149.253	205.238	85.1932
169.891	103.204	167.484
104.538	125.376	610.024
201.525	193.147	320.726
170.929	192.399	113.57
123.94	158.483	320.377
88.9846	157.568	215.169
130.037	215.771	138.817
170.073	122.021	63.3211
130.47	263.965	147.079
281.153	110.521	158.622
287.38	177.204	137.185
218.151	240.657	102.681
262.392	143.443	260.077
175.836	233.827	73.699
294.367	157.647	161.14
72.9364	120.984	195.179
78.1566	166.499	115.418
139.764	321.051	66.9238
113.776	212.881	191.655
122.325	149.263	172.261
78.1074	220.05	162.925
116.612	421.542	178.296
116.616	217.115	172.01
189.565	201.011	115.974
151.82	153.438	119.792
128.332	205.26	128.988
80.7504	170.142	203.88
136.883	526.361	150.958
151.06	118.476	147.262
219.166	176.496	164.893
88.6329	134.27	487.714
304.771	307.869	157.958
633.26	106.952	87.6882
112.631	112.424	142.337
178.437	152.339	1188.04
149.644	155.099	237.762
138.963	135.995	177.837
193.377	151.235	96.71
135.127	99.6144	185.504
229.044	165.22	167.539
162.651	104.963	114.495
219.299	204.483	201.028
168.324	187.149	104.426
144.541	137.485	159.777
136.448	138.367	169.127
221.95	281.702	204.951
256.341	128.019	163.847
241.228	202.872	110.29
229.516	102.855	114.467
214.334	114.984	220.168
166.803	203.214	126.446
125.814	188.138	307.158
230.504	196.999	241.818
102.065	181.397	160.3
42.7315	305.371	159.404
163.975	192.363	147.108
89.0665	230.508	152.149
204.745	233.568	104.624
141.583	104.547	206.13
177.476	244.075	341.081
116.483	170.103	133.887
199.193	159.154	173.176
229.637	225.742	378.598
224.349	273.269	114.321
320.782	211.51	109.878
185.441	75.5859	78.4187
238.241	119.12	185.32
186.992	330.478	241.138
391.085	101.342	131.659
157.888	228.617	107.277
137.933	136.436	248.11
161.89	153.272	178.984
147.356	115.049	108.94
156.391	244.794	158.958
127.893	142.33	213.413
1003.44	146.358	95.8058
190.073	372.345	215.052
208.161	342.183	197.138
157.011	450	172.161
232.968	123.378	190.3
208.91	144.177	192.15
183.911	206.565	137.772
159.993	168.161	88.3289
165.527	254.575	103.36
159.847	155.47	146.868
291.743	97.8419	146.213
179.921	326.584	299.142
165.686	71.2567	416.535
119.956	349.133	192.537
101.489	141.579	220.27
126.336	154.66	200.306
109.249	136.588	67.3863
185.064	208.417	228.939
231.26	146.15	383.958
190.451	136.772	263.329
193.471	399.195	132.239
136.618	105.537	246.023
145.458	106.944	117.454
294.307	116.928	172.391
494.26	247.765	114.349
206.405	94.1464	186.802
195.284	159.431	363.04
129.184	134.319	186.824
69.9143	182.645	274.575
85.8281	152.937	158.502
155.292	138.62	104.381
115.266	139.269	100.538
146.346	249.695	94.5606
111.153	299.475	415.767
213.307	184.45	138.016
202.031	297.998	147.216
90.9395	139.41	163.581
199.878	140.542	167.296
168.663	311.037	338.794
438.451	278.276	162.593
141.236	166.334	144.583
284.111	261.591	147.247
182.717	115.05	237.601
164.427	195.816	190.437
169.051	115.143	115.619
82.6342	159.402	167.187
145.517	137.245	265.168
387.661	150.189	174.303
290.46	61.258	164.783
125.86	157.566	142.772
235.068	258.564	155.865
176.084	239.552	310.509
151.052	166.703	564.883
248.113	94.385	204.339
185.992	202.565	150.684
124.949	174.887	104.189
177.996	104.148	172.74
105.189	250.202	148.796
1323.18	111	141.718
113.526	249.622	66.7815
184.203	247.248	58.1788
102.844	103.413	474.584
192.831	163.6	142.846
106.823	124.591	191.967
95.7138	186.85	89.2968
154.635	129.79	317.828
145.296	162.225	178.598
256.61	115.408	167.532
125.457	102.361	146.652
127.742	148.151	172.93
219.714	50.6745	89.5108
172.634	112.709	111.301
153.974	157.122	173.339
167.828	179.415	164.183
219.594	322.418	176.187
144.443	159.281	144.185
71.5105	204.357	110.538
228.948	110.362	190.822
106.43	192.677	384.206
122.364	268.723	170.881
150.307	168.234	212.46
189.344	204.644	85.5891
300.801	288.242	174.4
172.009	340.724	169.008
341.175	259.421	252.506
178.246	255.322	222.681
236.865	118.164	217.157
231.574	167.006	226.099
223.81	320.529	110.842
174.482	131.893	219.977
86.5664	215.467	164.685
160.139	254.052	278.742
202.386	185.587	193.637
109.936	165.579	226.538
110.423	181.605	295.56
162.236	510.362	149.842
224.195	156.959	115.094
171.182	220.323	293.173
209.729	151.553	129.637
189.668	180.457	271.402
147.887	67.5427	175.121
108.147	101.877	168.486
149.637	160.759	161.721
260.834	291.56	125.084
296.265	214.267	87.5882
133.423	127.126	324.189
146.192	123.471	123.126
166.115	271.71	99.9998
155.657	1688.46	163.489
731.539	413.165	58.6791
223.837	85.8404	176.464
104.796	113.142	68.777
158.682	153.943	155.513
93.6469	151.863	158.808
244.98	182.275	151.328
219.176	297.535	143.805
221.78	132.41	130.597
106.242	211.805	141.053
171.549	110.403	162.777
92.7518	199.723	166.058
84.6083	244.489	136.8
215.702	241.893	173.368
99.8267	545.024	193.365
445.569	95.3273	180.731
226.139	113.246	167.768
139.397	192.826	63.8299
99.5172	209.78	131.291
254.062	135.364	189.557
465.29	108.556	190.307
196.52	275.775	145.659
133.862	524.464	390.99
151.274	267.078	215.443
498.644	108.427	239.476
185.361	154.451	202.946
180.919	165.655	232.5
234.909	117.215	93.216
176.073	713.577	64.9256
138.38	192.204	160.378
221.938	159.29	116.5
80.9134	314.358	122.768
126.683	77.6223	167.976
117.157	514.924	205.113
134.881	88.9767	86.6828
186.086	205.76	1081.5
187.095	80.8238	247.171
117.343	155.543	159.03
99.3246	273.418	163.701
188.835	184.908	158.875
123.18	89.9094	190.469
165.973	172.984	179.982
171.359	134.948	66.7149
135.521	91.2966	347.007
60.9662	66.571	357.984
164.144	226.447	155.383
156.52	112.909	85.4102
72.9594	199.674	199.99
476.918	113.106	102.352
114.176	134.539	135.632
156.801	145.724	146.609
183.268	169.931	125.696
366.732	149.855	164.757
211.235	206.668	222.76
92.3473	186.722	1522
195.738	346.665	201.214
125.945	126.703	556.139
262.431	201.986	251.837
163.986	232.548	110.44
300.966	206.173	99.5269
179.455	166.555	138.065
251.523	286.539	217.363
194.863	218.693	115.399
144.572	120.789	81.5334
85.4321	348.687	196.628
121.005	147.13	345.444
145.025	93.7834	125.265
116.539	117.024	161.967
774.657	264.939	275.612
446.831	98.0107	267.882
160.244	82.3349	135.222
398.437	129.184	147.255
146.775	139.072	239.468
163.597	105.544	414.532
179.41	113.571	210.42
170.596	214.491	110.194
145.525	64.5568	233.306
277.251	155.215	220.476
207.158	147.171	157.358
121.835	646.875	141.431
242.036	474.277	167.271
347.934	164.204	141.044
427.375	195.472	163.426
130.878	133.421	192.802
207.164	220.438	147.246
135.792	189.309	117.58
110.109	161.225	133.548
76.979	89.4602	125.397
175.731	107.239	117.339
122.318	214.289	205.828
184.893	157.208	189.463
201.202	198.062	151.218
240.792	282.983	109.343
102.936	298.44	169.642
225.375	193.724	277.773
223.012	222.277	122.904
159.294	148.489	291.482
94.6613	201.723	236.596
152.154	83.9445	172.662
279.3	198.423	641.446
119.107	253.618	218.082
255.906	172.651	116.54
381.487	70.758	141.365
152.746	136.104	199.137
338.998	78.9618	159.117
95.4516	158.697	104.993
133.877	221.661	149.71
203.347	204.085	148.6
453.408	374.339	152.438
180.503	115.549	114.71
159.718	135.498	260.238
133.638	157.468	139.819
145.546	473.524	125.857
185.144	263.026	146.423
263.886	152.265	222.648
130.612	172.881	231.173
86.2576	177.416	95.3592
160.834	190.496	387.112
192.735	193.809	103.972
141.469	208.406	124.948
200.497	340.135	171.088
130.533	226.35	190.417
102.163	190.717	143.886
242.896	236.388	166.459
260.16	182.888	123.234
115.966	383.488	171.446
224.478	218.496	79.699
177.096	345.2	180.23
165.861	89.1803	152.611
146.926	78.9821	117.88
227.654	106.501	285.796
192.547	254.217	254.453
69.038	53.8584	271.774
97.3881	353.623	267.05
327.016	200.602	110.144
139.093	221.982	239.945
78.7198	295.046	162.893
194.629	263.915	166.88
194.968	141.762	174.169
169.163	203.374	230.19
126.587	241.638	134.968
234.824	69.1215	273.087
139.478	356.822	301.087
189.053	135.138	131.634
194.398	278.486	152.839
103.942	102.965	109.766
183.953	217.102	111.791
265.82	174.444	223.818
66.7379	74.3391	151.325
259.74	126.899	210.199
220.421	67.3115	177.01
80.036	203.202	178.41
224.749	281.67	70.1283
155.435	198.67	179.002
233.964	87.171	173.134
198.362	104.708	161.861
114.73	151.456	119.217
125.747	167.808	208.005
292.05	151.031	161.361
235.56	234.182	89.9598
79.7052	185.532	196.335
120.942	113.059	246.411
308.839	67.5978	143.072
99.0792	126.176	177.009
226.758	1201.27	123.465
157.875	358.584	195.949
240.73	223.272	205.737
171.125	133.572	107.523
127.54	113.247	213.44
139.314	105.464	162.841
164.008	111.962	99.3759
302.387	162.461	228.069
140.98	158.458	431.675
157.732	503.385	123.202
146.285	140.715	99.0931
251.524	323.881	137.577
120.182	203.819	177.508
89.1934	86.1436	147.833
183.62	231.026	426.394
78.4949	95.905	169.5
124.978	266.969	188.853
238.112	166.67	109.156
68.7106	222.017	149.812
82.1357	388.344	172.883
151.931	163.909	137.67
159.209	165.398	92.3615
391.357	106.264	285.44
171.137	234.378	146.738
214.149	138.312	261.675
99.7356	197.732	267.818
157.887	270.32	278.562
121.889	168.063	241.267
145.74	144.672	157.949
207.643	149.412	308.438
231.677	74.8785	153.636
156.196	190.842	314.822
162.392	165.54	213.033
120.555	310.282	216.289
138.119	105.559	227.995
98.3097	47.8581	177.499
154.309	167.862	267.458
108.088	93.1456	70.0846
116.103	99.3868	186.208
132.966	140.946	195.802
328.088	239.925	63.7838
273.36	150.079	163.824
127.173	45.0857	217.517
401.072	151.496	163.307
711.058	307.638	190.848
129.88	132.183	112.943
130.778	286.659	129.646
205.255	433.268	188.979
179.209	149.619	162.25
87.5349	90.855	103.702
101.908	118.529	202.711
130.973	64.7954	290.69
103.218	202.303	140.583
205.375	174.972	210.133
106.713	180.889	176.492
132.65	1158.46	101.829
264.503	213.073	201.608
225.494	236.867	120.642
76.6541	168.051	134.152
422.006	106.961	207.312
192.5	93.3684	143.24
140.817	224.711	246.37
233.55	103.213	559.215
109.841	154.262	231.199
168.316	153.176	96.3588
131.954	200.623	215.21
81.3722	172.129	74.3883
166.518	208.734	61.1165
152.092	153.195	176.256
209.473	208.43	135.754
135.348	153.389	231.78
159.782	87.0675	161.119
1106.08	137.107	124.076
166.271	149.237	207.575
130.758	176.636	96.359
165.313	435.036	72.6962
98.7296	142.462	188.22
162.608	210.466	274.346
102.611	177.308	45.3078
539.879	354.716	174.783
140.933	93.606	150.811
126	170.818	168.458
236.741	107.024	130.065
102.951	248.693	169.882
123.152	117.815	62.8958
121.656	217.063	143.035
159.155	57.3356	121.105
140.024	113.437	192.221
197.664	128.502	107.059
206.724	238.087	165.419
294.797	181.442	114.531
137.587	205.817	164.55
127.178	132.78	94.1822
194.495	210.886	199.152
148.369	255.121	175.959
105.085	374.909	142.413
134.066	283.385	206.79
158.736	141.058	274.334
314.092	157.816	151.401
171.074	88.411	92.4828
163.459	289.644	169.888
148.181	187.485	116.653
160.841	150.505	135.765
207.982	91.8218	69.875
168.333	87.9332	99.1131
156.524	325.806	182.777
117.759	154.777	217.6
165.088	406.06	72.6122
168.018	119.288	114.632
171.616	334.937	381.969
147.007	722.144	144.962
215.854	240.414	122.337
320.92	124.396	299.594
87.1559	120.301	308.977
193.612	108.903	107.731
107.713	107.449	134.634
152.244	185.022	76.9095
126.925	243.266	306.018
136.74	126.271	205.839
171.061	230.922	139.988
85.852	113.572	123.218
55.8589	413.694	133.3
207.672	115.52	236.484
113.918	124.783	194.105
329.484	338.126	116.548
291.284	174.416	175.82
90.304	115.209	235.852
224.675	1458.39	220.707
215.484	126.587	377.903
148.08	84.9498	151.558
195.609	176.765	117.07
118.362	124.785	219.434
126.357	158.161	190.894
195.914	113.124	125.108
319.429	145.621	221.54
87.2657	525.095	494.796
174.22	156.193	137.083
94.4915	71.7158	257.886
177.068	182.801	170.914
331.139	320.747	342.391
125.758	279.822	68.3608
210.766	174.351	138.762
181.862	139.155	155.661
215.732	95.2253	201.473
67.9341	129.039	161.383
218.049	115.369	159.961
93.8073	107.22	220.32
282.327	195.76	165.656
317.851	70.0382	135.993
201.855	921.287	243.001
105.459	183.124	97.2712
269.567	406.579	128.818
115.129	187.384	225.01
200.82	159.302	629.93
100.205	255.031	266.309
254.015	111.996	87.0706
181.793	500.177	104.3
108.125	164.531	102.914
91.9187	1294.28	104.159
212.765	150.836	184.266
135.336	106.4	278.294
103.485	202.799	226.485
73.9678	260.96	321.57
208.155	129.321	169.43
159.145	355.323	107.909
499.012	244.579	176.38
227.213	340.15	133.009
232.587	153.999	208.216
249.888	199.809	134.592
122.882	242.744	181.967
202.586	127.593	111.474
208.943	130.734	127.749
128.126	118.135	153.586
396.539	354.306	191.261
169.167	245.491	134.883
120.035	464.504	86.8015
89.1429	119.812	408.118
307.399	149.729	174.719
188.861	167.986	165.324
99.9008	113.792	181.561
134.463	221.906	94.4598
139.824	161.235	145.661
186.37	208.225	221.791
240.272	154.941	188.979
126.645	200.175	378.014
171.152	113.2	95.3279
926.533	176.317	1408.82
130.768	123.666	269.098
189.042	213.601	168.217
115.41	321.171	210.123
87.3166	321.461	187.789
183.472	233.742	150.793
141.47	190.978	127.389
181.518	205.148	333.798
116.289	157.962	223.602
144.036	123.076	236.078
100.438	222.963	153.011
171.912	160.028	102.256
110.754	162.34	118.936
256.217	212.24	164.022
116.443	193.22	199.43
131.815	214.452	160.469
268.979	125.513	120.433
194.44	107.182	181.215
169.728	168.303	174.098
103.182	155.251	137.763
201.162	304.976	116.903
322.239	457.226	128.476
169.121	143.758	175.282
533.735	274.686	2297.49
122.355	133.45	104.645
143.781	211.113	127.595
222.78	108.227	229.586
121.222	284.342	246.602
178.051	124.64	92.2937
161.783	336.899	94.8549
287.58	196.275	101.499
78.9736	129.966	142.813
90.0767	197.368	200.717
68.6934	175.311	194.401
144.975	195.664	136.991
100.218	269.736	393.731
203.518	151.834	427.833
192.353	143.536	296.632
162.272	218.109	99.906
120.581	226.062	72.7994
178.175	193.352	351.177
254.13	176	230.998
100.526	107.887	88.9904
142.372	463.308	265.608
171.153	264.128	178.785
119.683	236.411	415.186
121.836	166.618	252.075
383.973	197.594	255.902
248.869	132.156	120.103
148.93	203.902	58.6175
375.954	217.875	250.884
122.006	137.667	123.236
188.828	711.815	174.198
139.149	126.518	128.202
137.913	92.6515	103.904
173.209	75.5545	197.491
207.264	150.476	278.975
305.903	129.57	162.547
234.184	162.118	174.531
191.775	134.618	394.464
160.206	241.623	120.16
104.686	103.988	169.303
90.5629	176.358	166.503
212.791	212.825	228.146
151.852		337.358
128.93		157.073
128.484		187.342
97.385		243.59
164		140.428
400.521		113.765
175.801		234.181
263.758		119.698
139.584		192.025
297.927		140.621
224.434		135.924
187.611		311.295
206.835		163.205
137.854		160.363
126.181		204.576
179.93		117.508
265.5		199.743
254.785		84.5476
108.205		332.973
92.6112		140.022
89.7476		134.714
225.452		219.317
103.197		167.398
208.892		297.119
186.706		246.287
156.882		358.755
91.7284		117.063
201.332		262.093
77.1371		279.685
168.919		285.731
87.4756		264.677
256.639		281.425
167.7		199.225
152.271		86.8885
148.964		188.732
183.123		183.46
189.341		98.1006
260.054		183.294
118.445		175.55
279.922		139.529
216.83		175.424
153.24		317.92
171.792		154.497
174.02		162.348
165.712		250.274
148.276		427.907
214.517		106.924
167.886		194.556
151.271		131.244
111.146		211.625
137.237		81.4462
210.801		88.5773
116.449		135.869
124.962		92.6771
110.093		161.856
130.771		167.515
186.759		112.335
90.7634		163.543
206.318		256.487
157.848		123.324
250.17		158.729
175.587		208.972
147.56		112.692
545.168		68.1828
119.834		229.56
113.009		122.99
182.544		246.256
227.387		160.882
116.57		93.184
346.304		127.11
209.382		97.2131
118.049		80.7407
154.397		316.769
82.3921		129.928
113.021		87.7507
139.172		151.806
133.593		121.975
136.368		164.853
56.5177		280.78
100.839		271.726
247.162		134.686
131.485		90.5777
93.2017		183.669
165.406		261.416
89.5958		128.947
234.357		126.647
290.576		154.432
130.788		131.658
242.849		79.3318
852.336		207.93
194.866		84.6844
138.994		151.049
241.225		143.756
215.28		168.016
129.155		128.246
468.704		176.426
205.93		119.856
212.19		133.964
288.129		131.824
150.623		194.576
247.993		256.067
273.766		158.233
160.31		155.154
132.341		194.407
226.347		163.413
110.139		151.525
138.54		123.759
157.852		230.405
114.206		129.317
208.222		268.017
253.516		159.556
124.946		157.84
274.764		132.027
272.92		150.628
179.318		377.386
122.589		141.145
63.9233		162.164
107.241		172.816
206.433		233.694
220.797		134.105
200.606		305.915
142.332		126.062
116.348		93.0736
112.74		102.316
51.1595		210.701
230.308		83.3604
115.741		146.815
303.397		208.987
174.514		240.82
341.553		56.1578
269.062		119.013
184.302		189.637
168.854		206.329
90.8277		205.119
208.708		103.502
199.187		173.02
114.676		193.863
228.146		136.581
212.467		136.723
150.283		175.982
176.887		107.767
110.47		278.202
279.457		199.131
113.169		136.902
183.208		86.9451
223.89		140.647
129.601		129.372
320.994		236.318
236.887		136.275
155.169		183.973
345.538		302.694
170.036		178.832
155.927		163.647
160.146		81.6523
252.303		173.954
146.254		201.846
428.712		110.299
1195.27		184.544
80.1909		192.746
144.221		166.11
122.122		164.385
181.141		179.486
254.069		214.23
138.737		102.084
174.179		105.551
303.306		285.806
106.228		203.517
243.496		144.698
751.364		120.965
319.781		216.143
222.465		211.387
146.268		203.287
85.6298		166.711
234.385		222.444
108.247		135.71
152.734		94.5504
146.678		173.063
168.691		140.266
158.312		152.918
259.485		159.733
188.641		112.213
105.4		222.898
433.154		213.462
133.088		120.729
147.366		233.45
242.697		132.965
119.92		216.475
102.406		198.701
51.1156		115.78
165.566		158.792
745.299		305.775
174.825		155.874
151.311		178.49
131.763		86.8295
117.976		280.645
203.075		101.442
325.594		141.622
169.782		96.452
372.738		102.762
176.587		266.913
53.2617		108.866
93.4966		256.26
97.7081		189.503
144.307		174.616
106.571		178.858
147.287		99.1827
121.801		106.217
137.869		239.158
139.912		105.922
301.468		317.546
216.481		125.817
105.557		89.8296
410.248		352.32
118.589		208.153
161.018		129.182
140.391		167.351
807.296		210.729
380.645		344.181
[truncated: 6,159 more rows]
