# Supplementary figures and images for: Two forms of Opa1 cooperate to complete fusion of the mitochondrial inner-membrane
Source: eLife journal article supplement (doi:10.7554/elife.50973), 2020-01-10

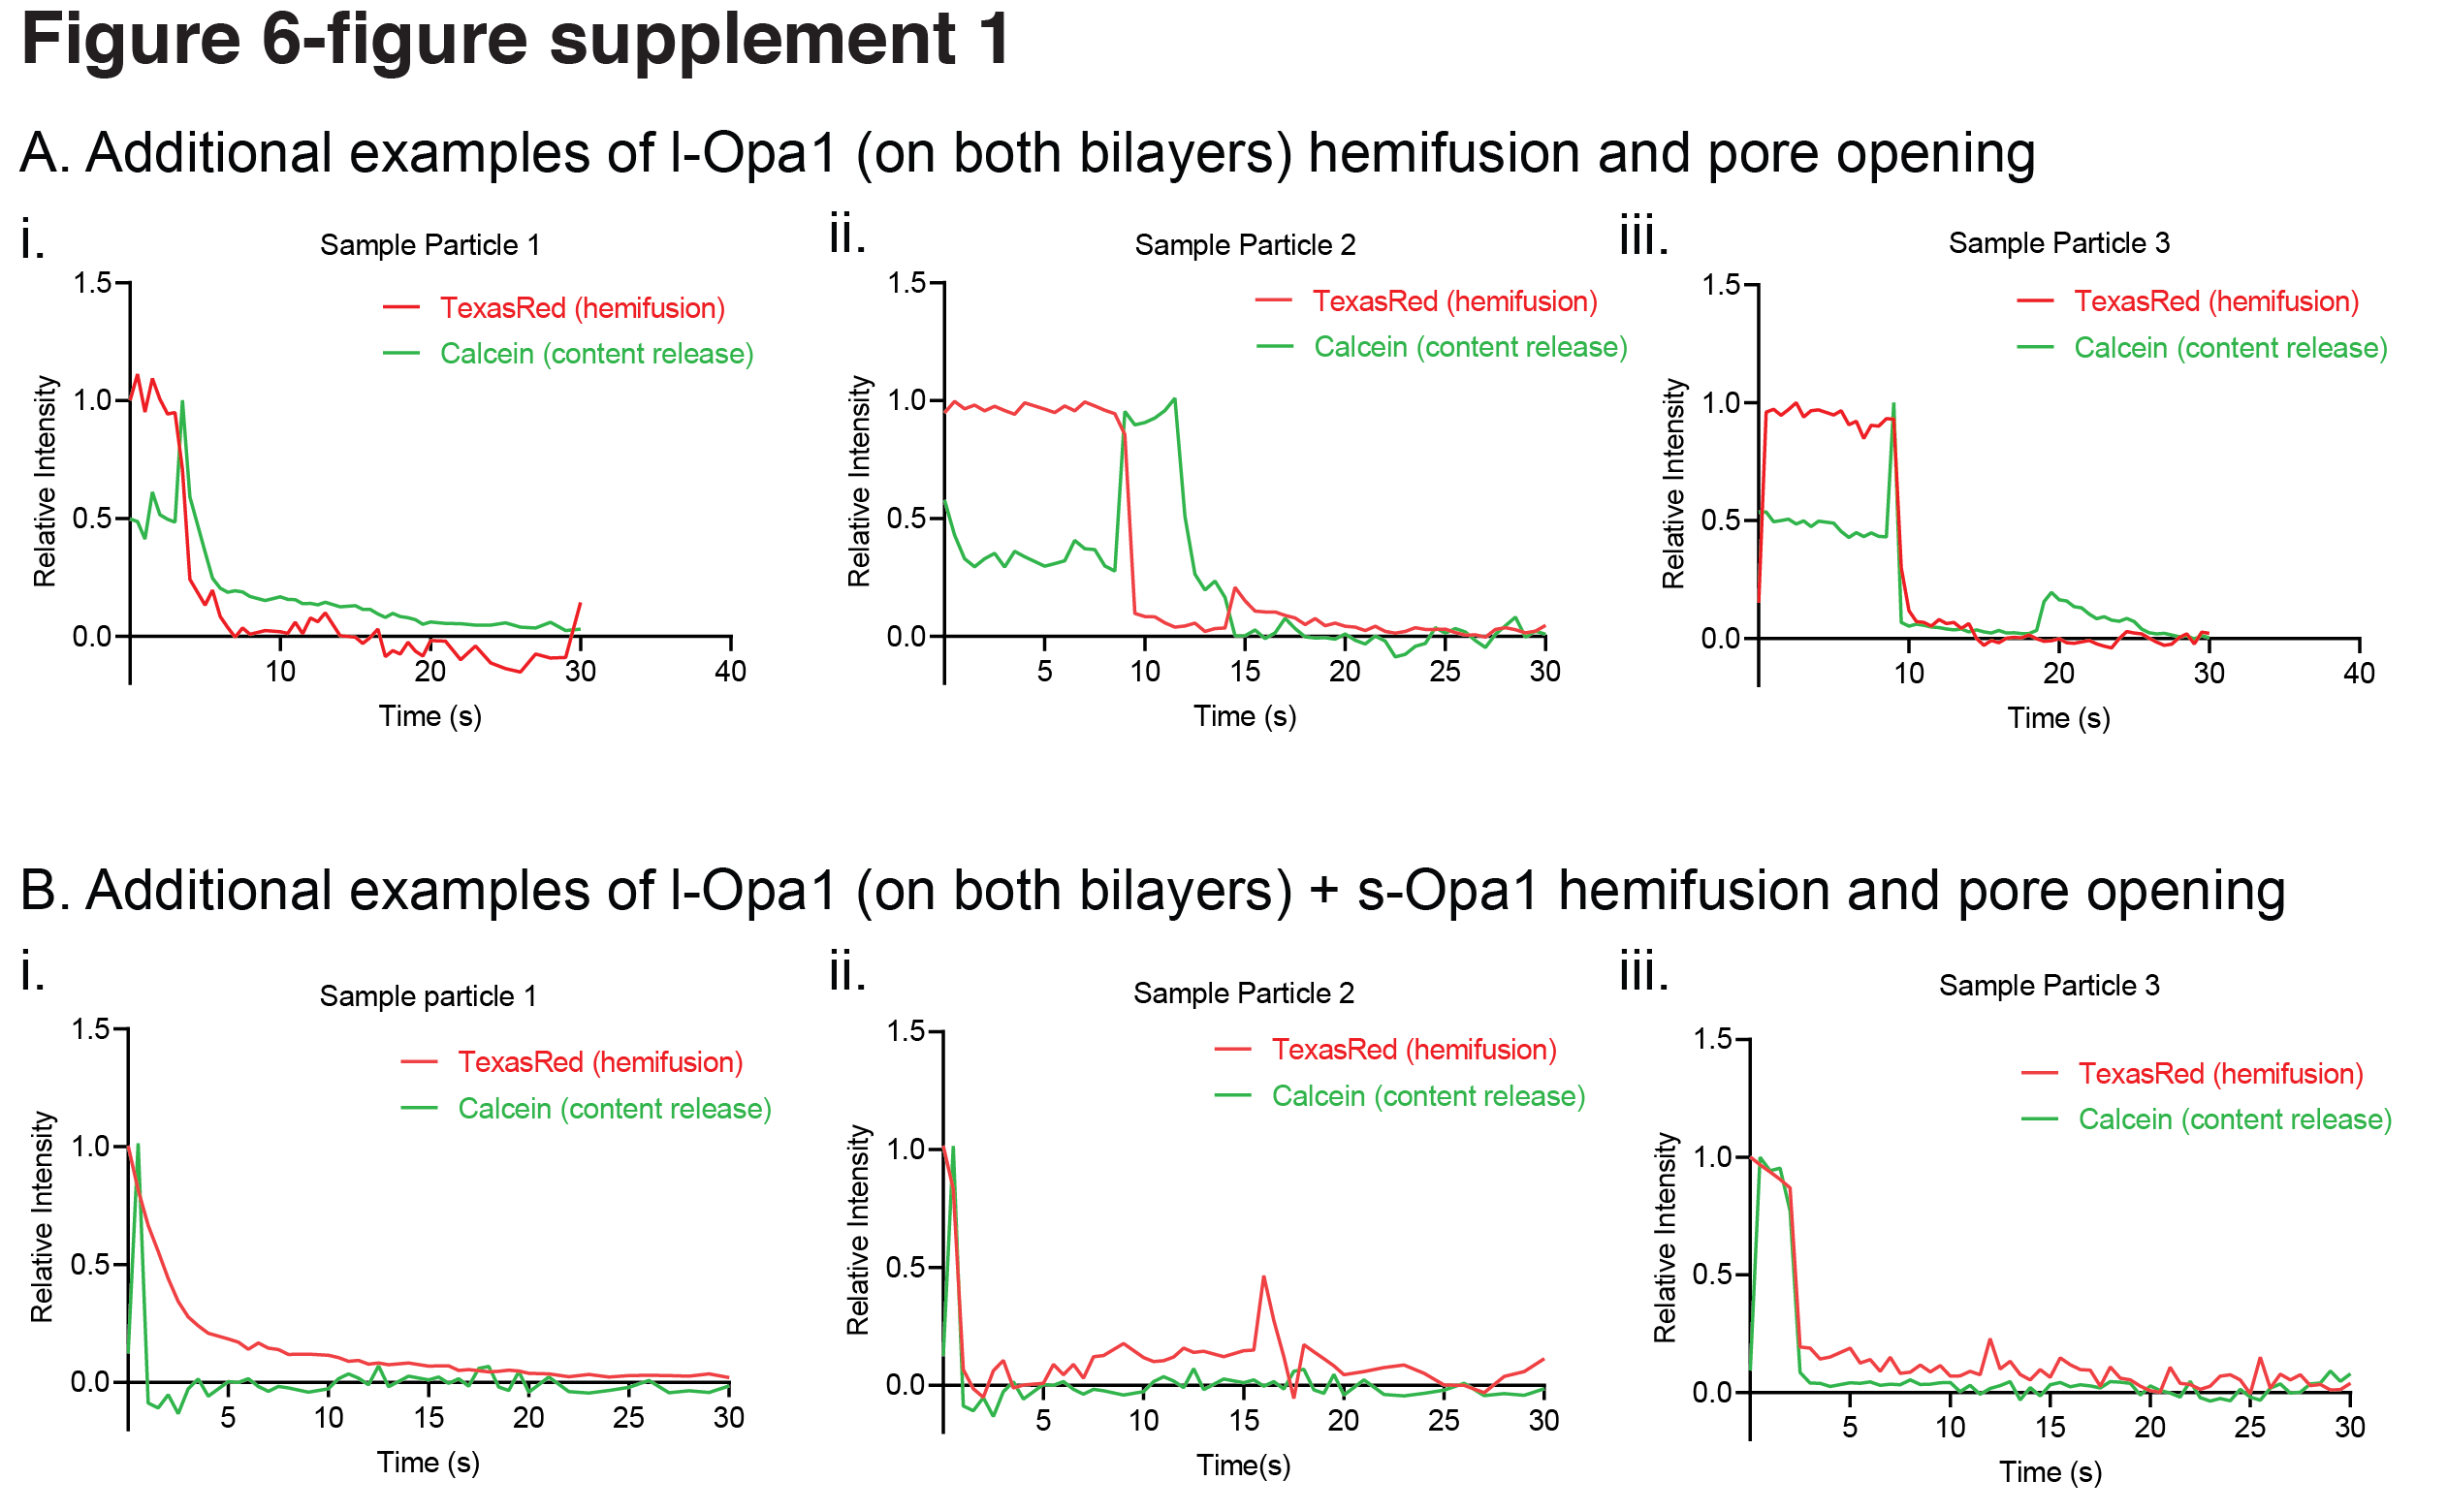

Supplement: supp [file elife-50973-supp-v1.zip › elife_poa_e50973_Figure_6_figure_supplement_1.png]

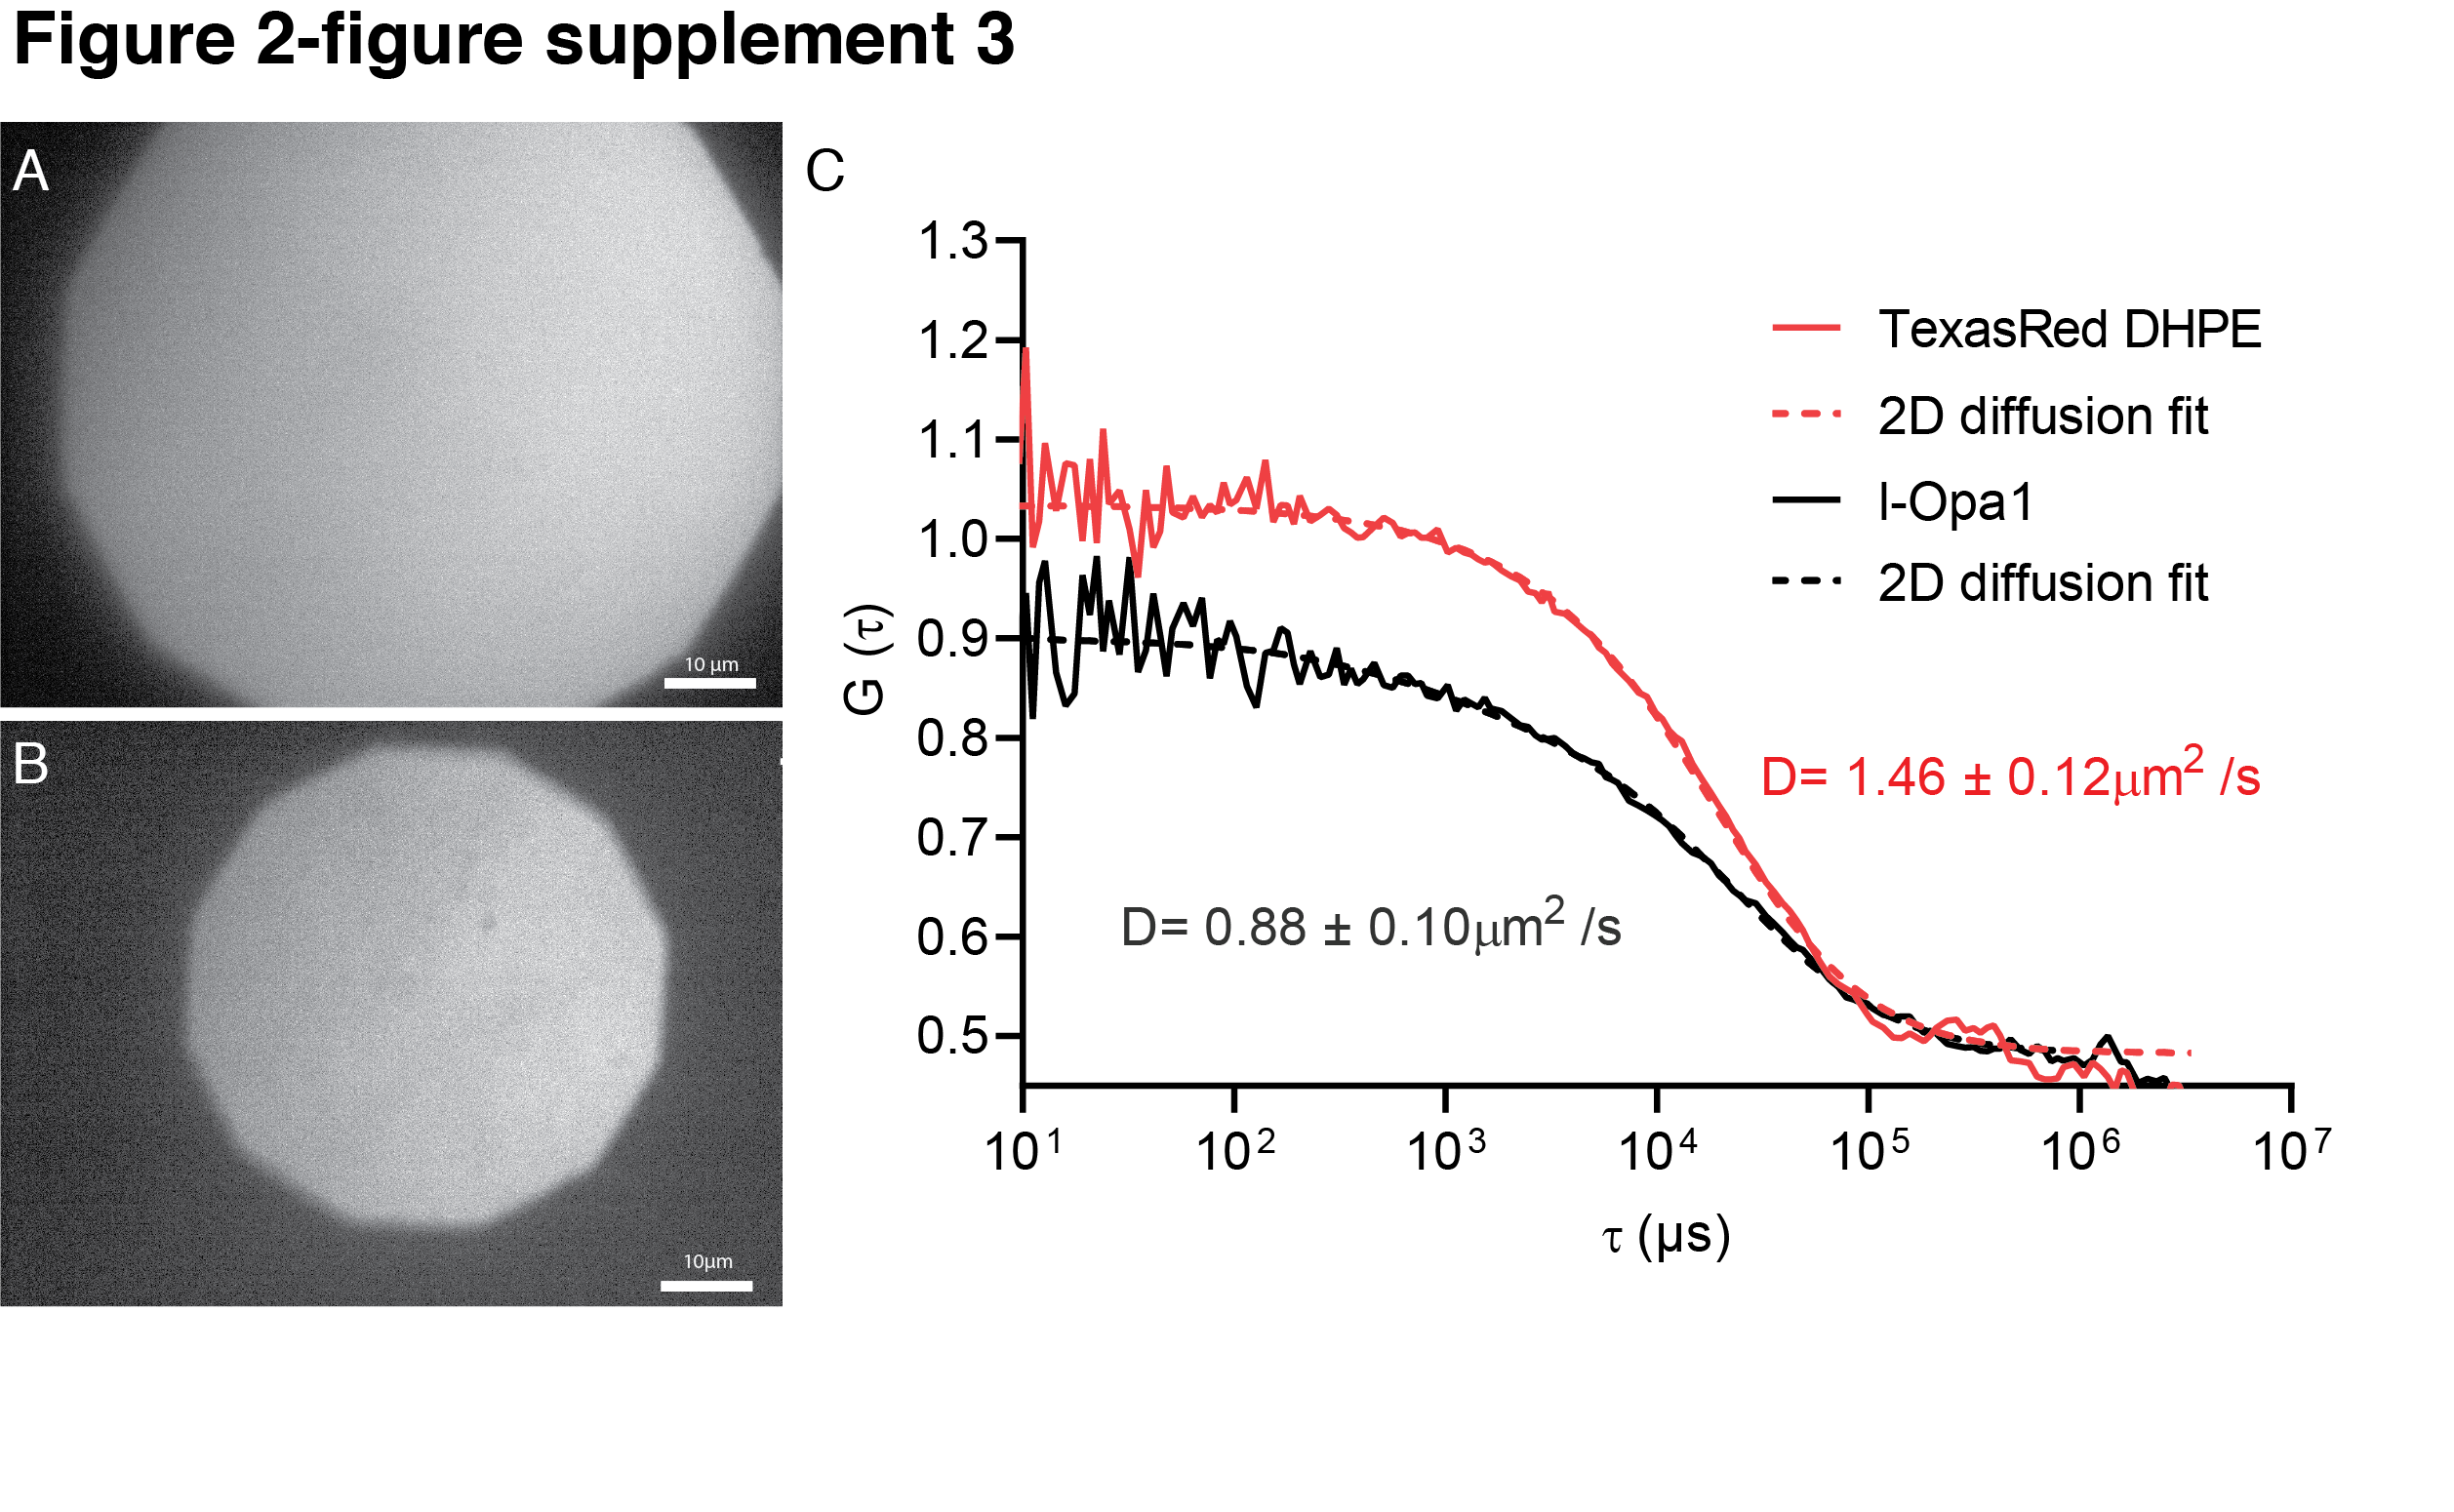

Supplement: supp [file elife-50973-supp-v1.zip › elife_poa_e50973_Figure_2_figure_supplement_3.png]

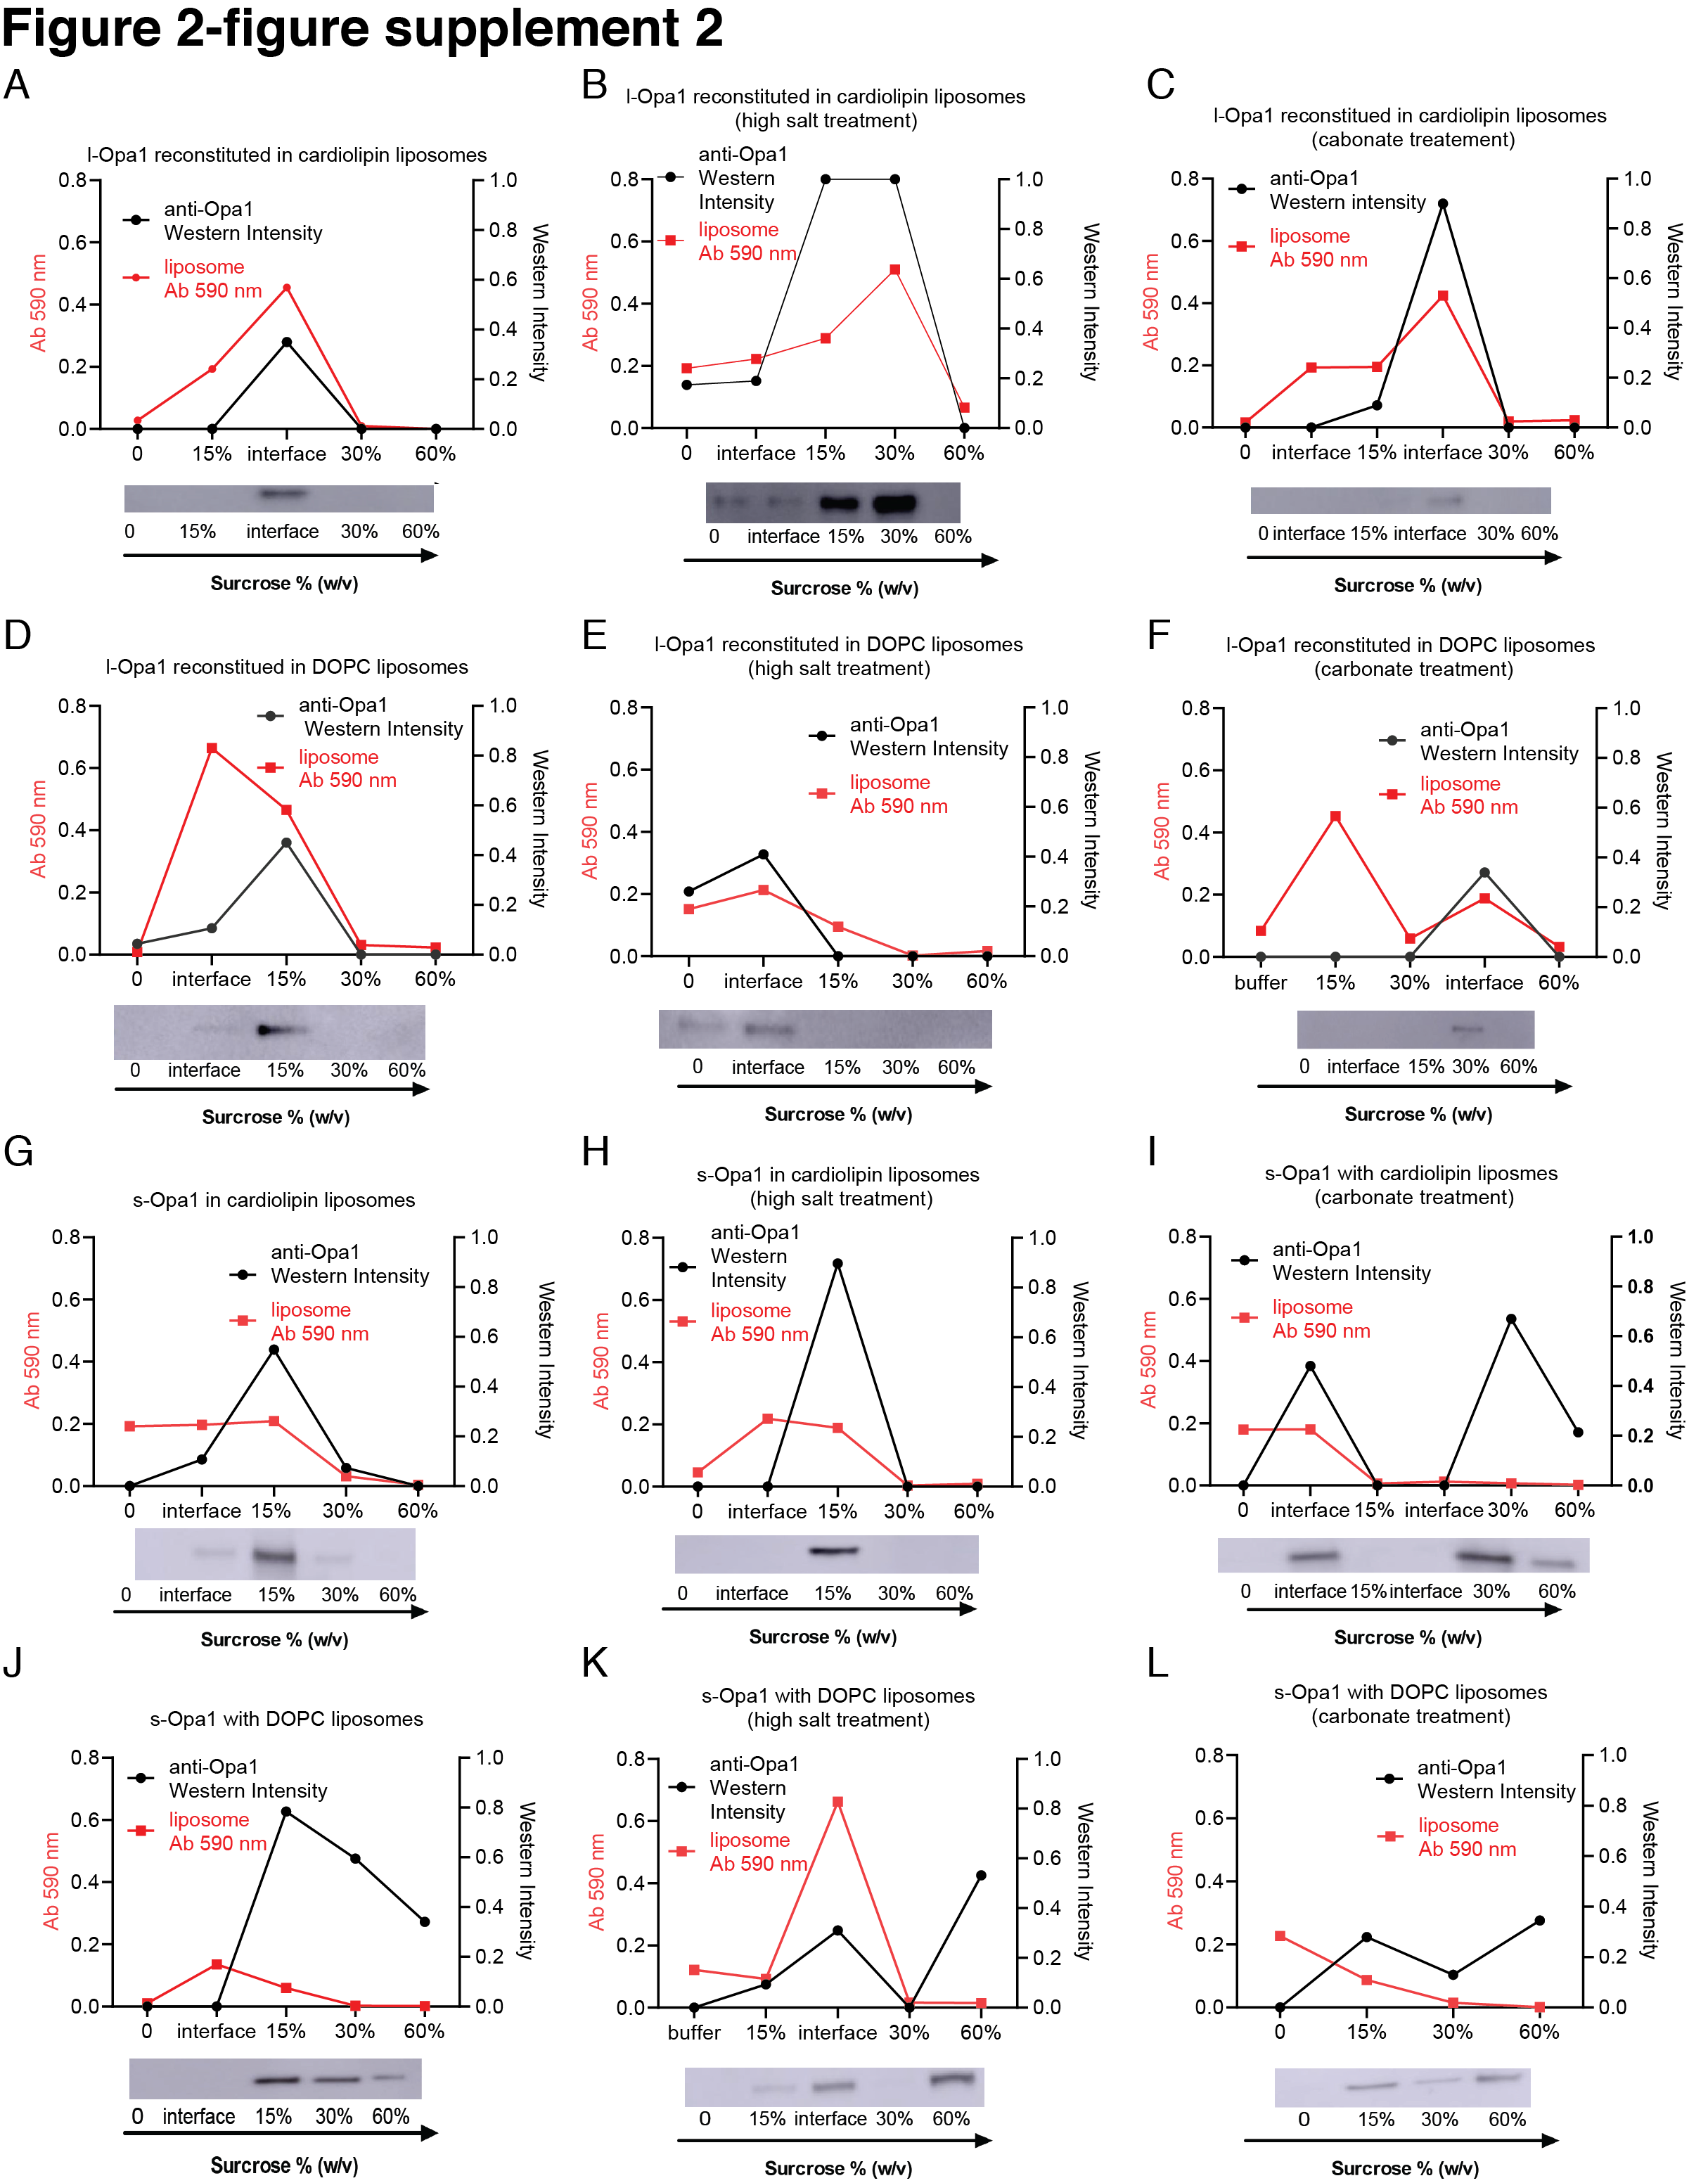

Supplement: supp [file elife-50973-supp-v1.zip › elife_poa_e50973_Figure_2_figure_supplement_2.png]

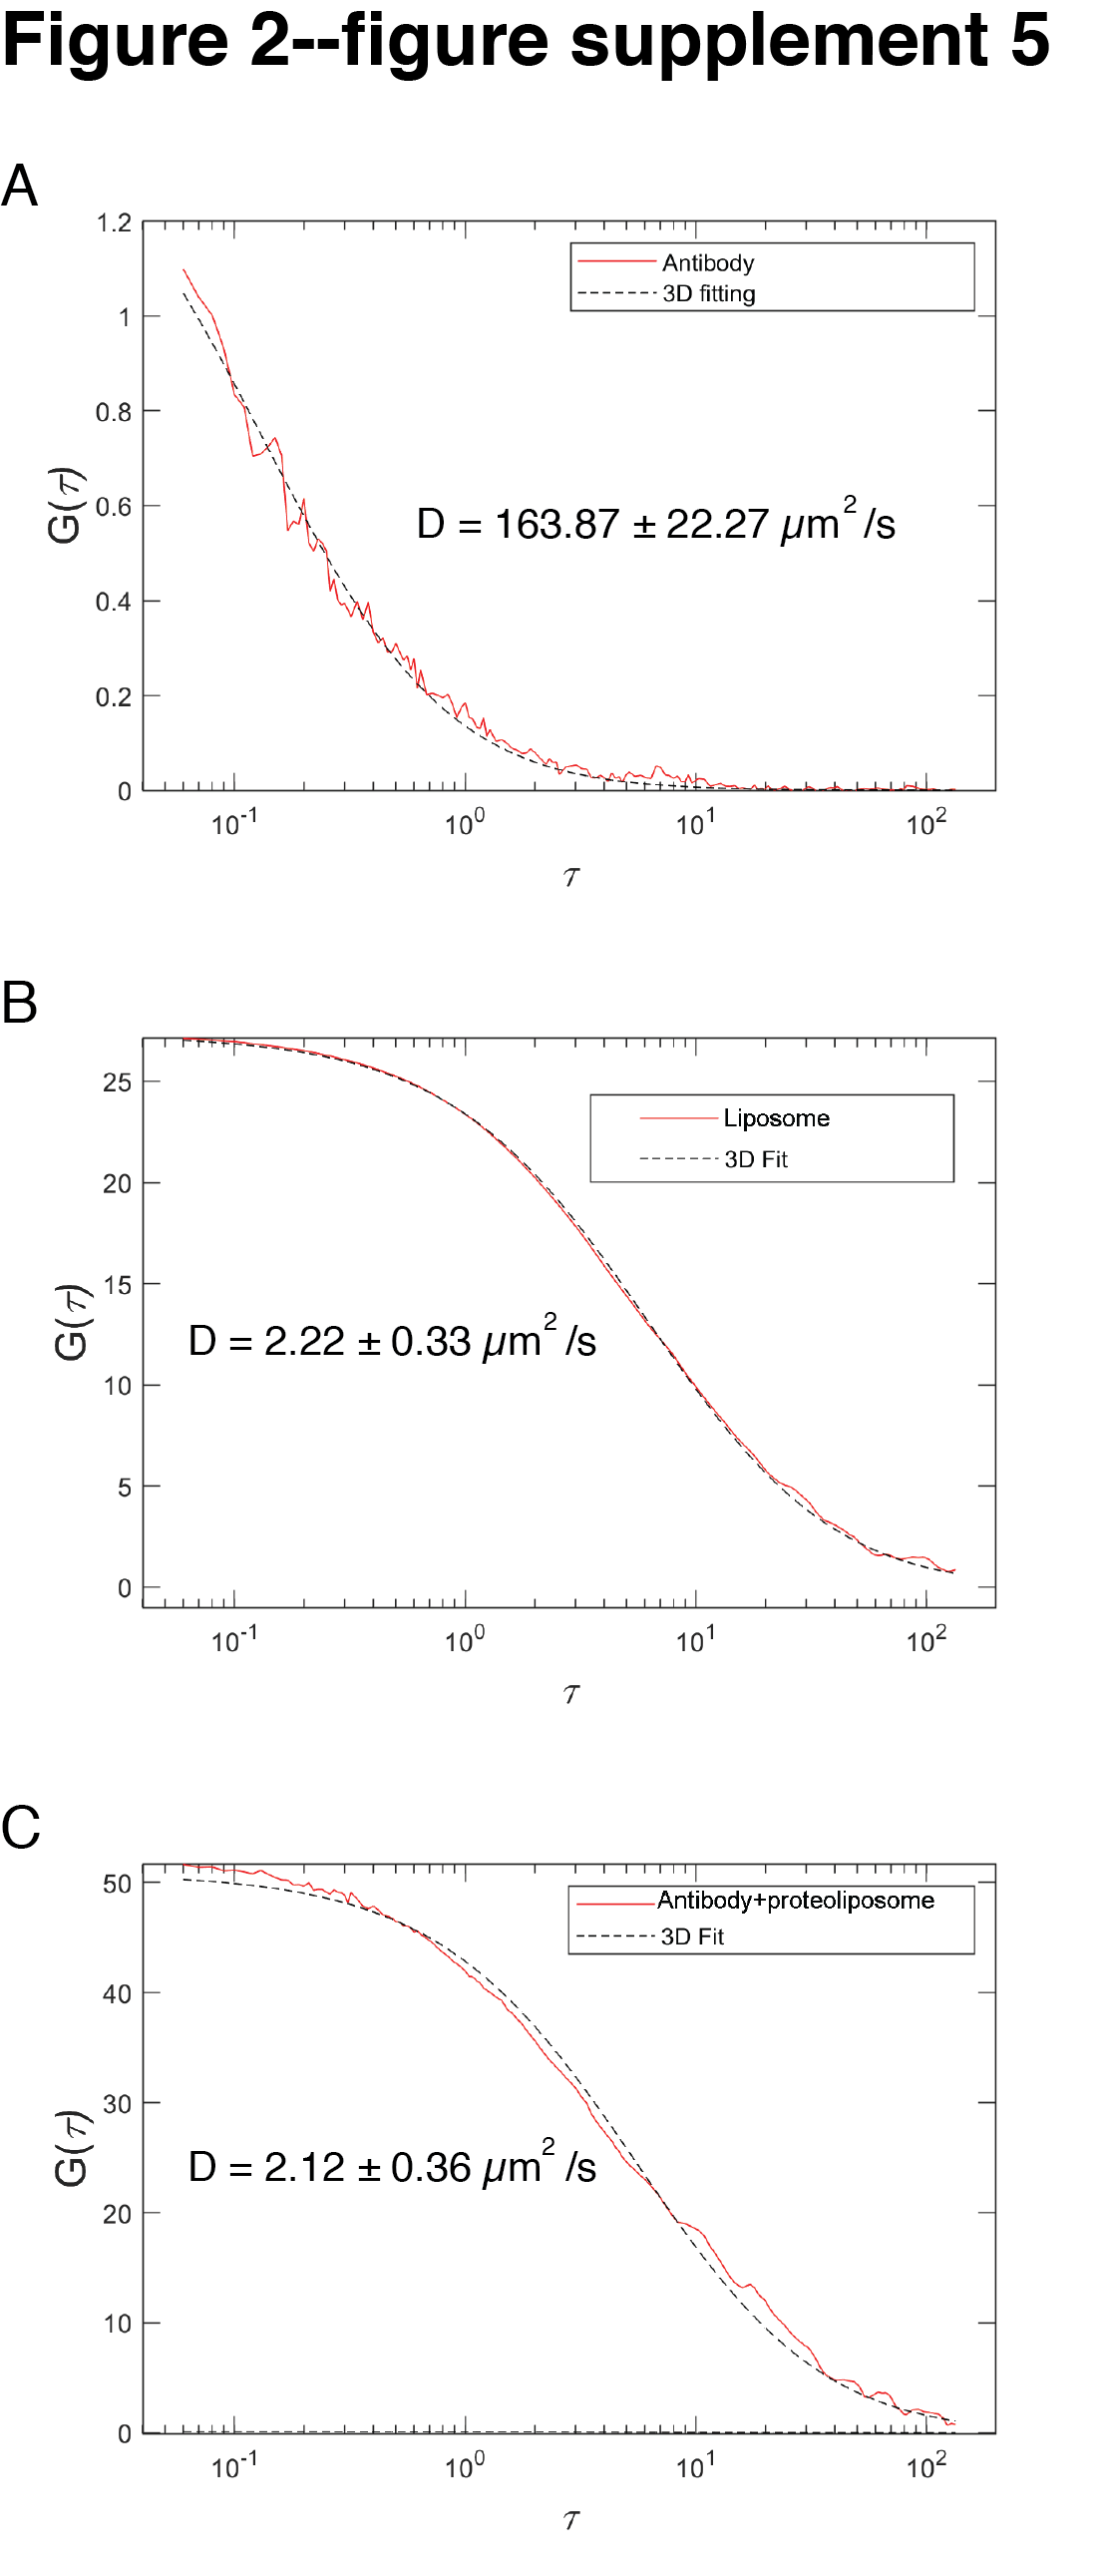

Supplement: supp [file elife-50973-supp-v1.zip › elife_poa_e50973_Figure_2_figure_supplement_5.png]

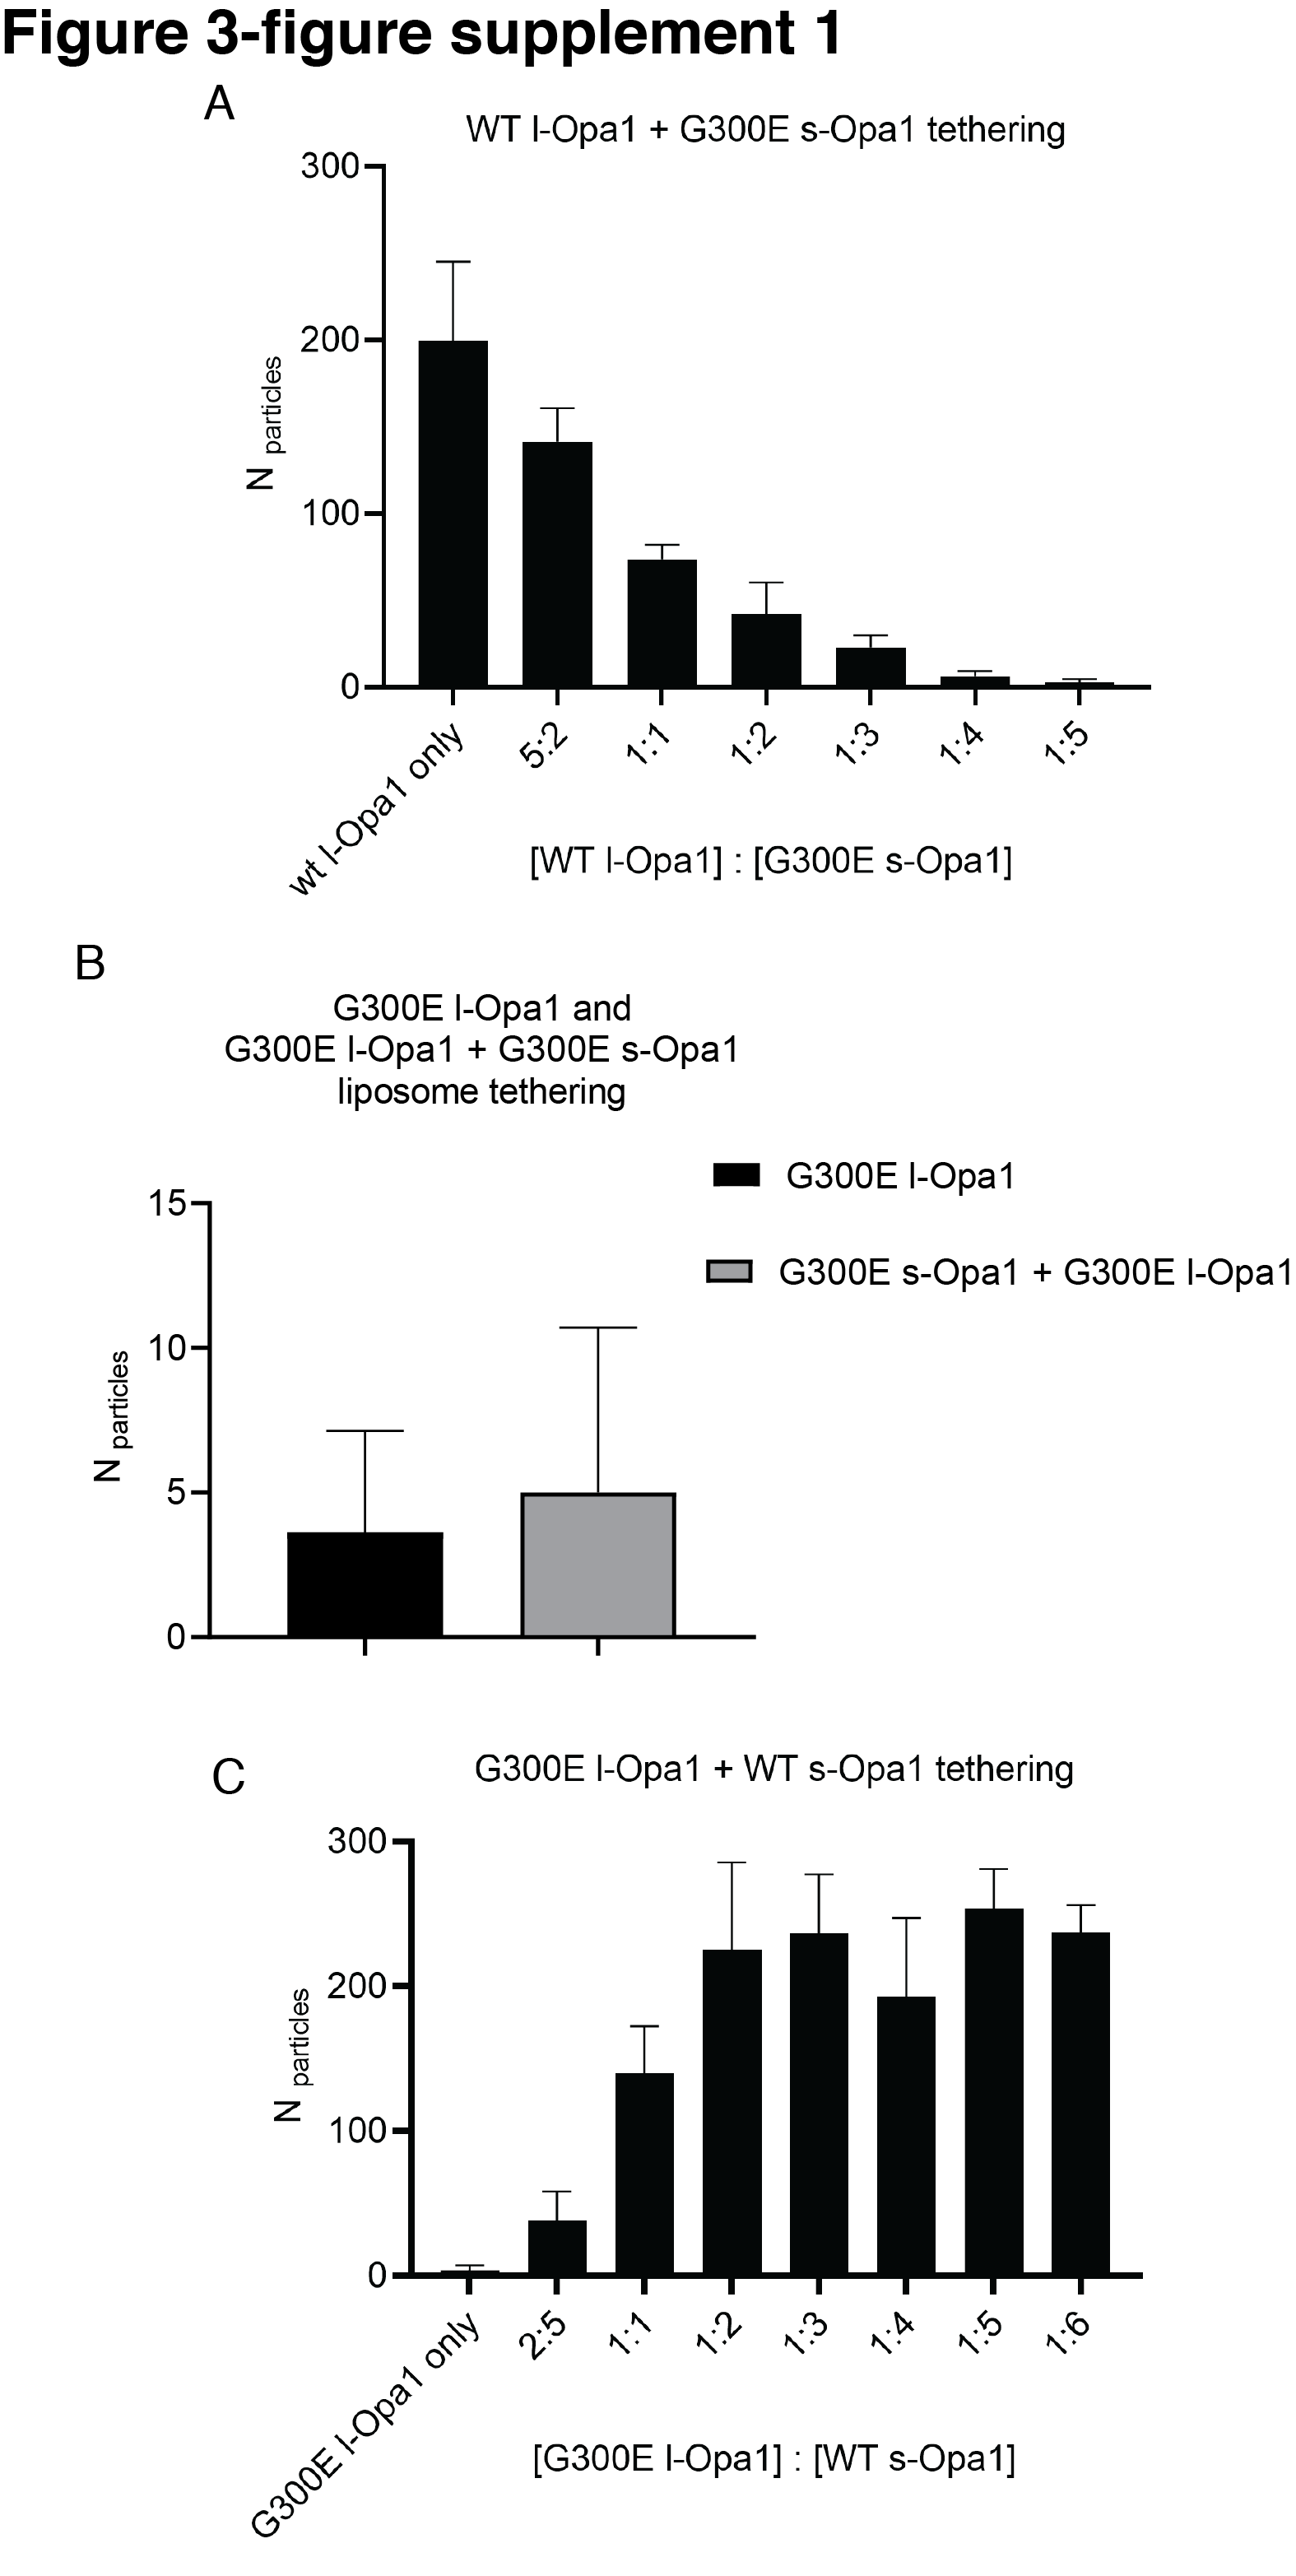

Supplement: supp [file elife-50973-supp-v1.zip › elife_poa_e50973_Figure_3_figure_supplement_1.png]

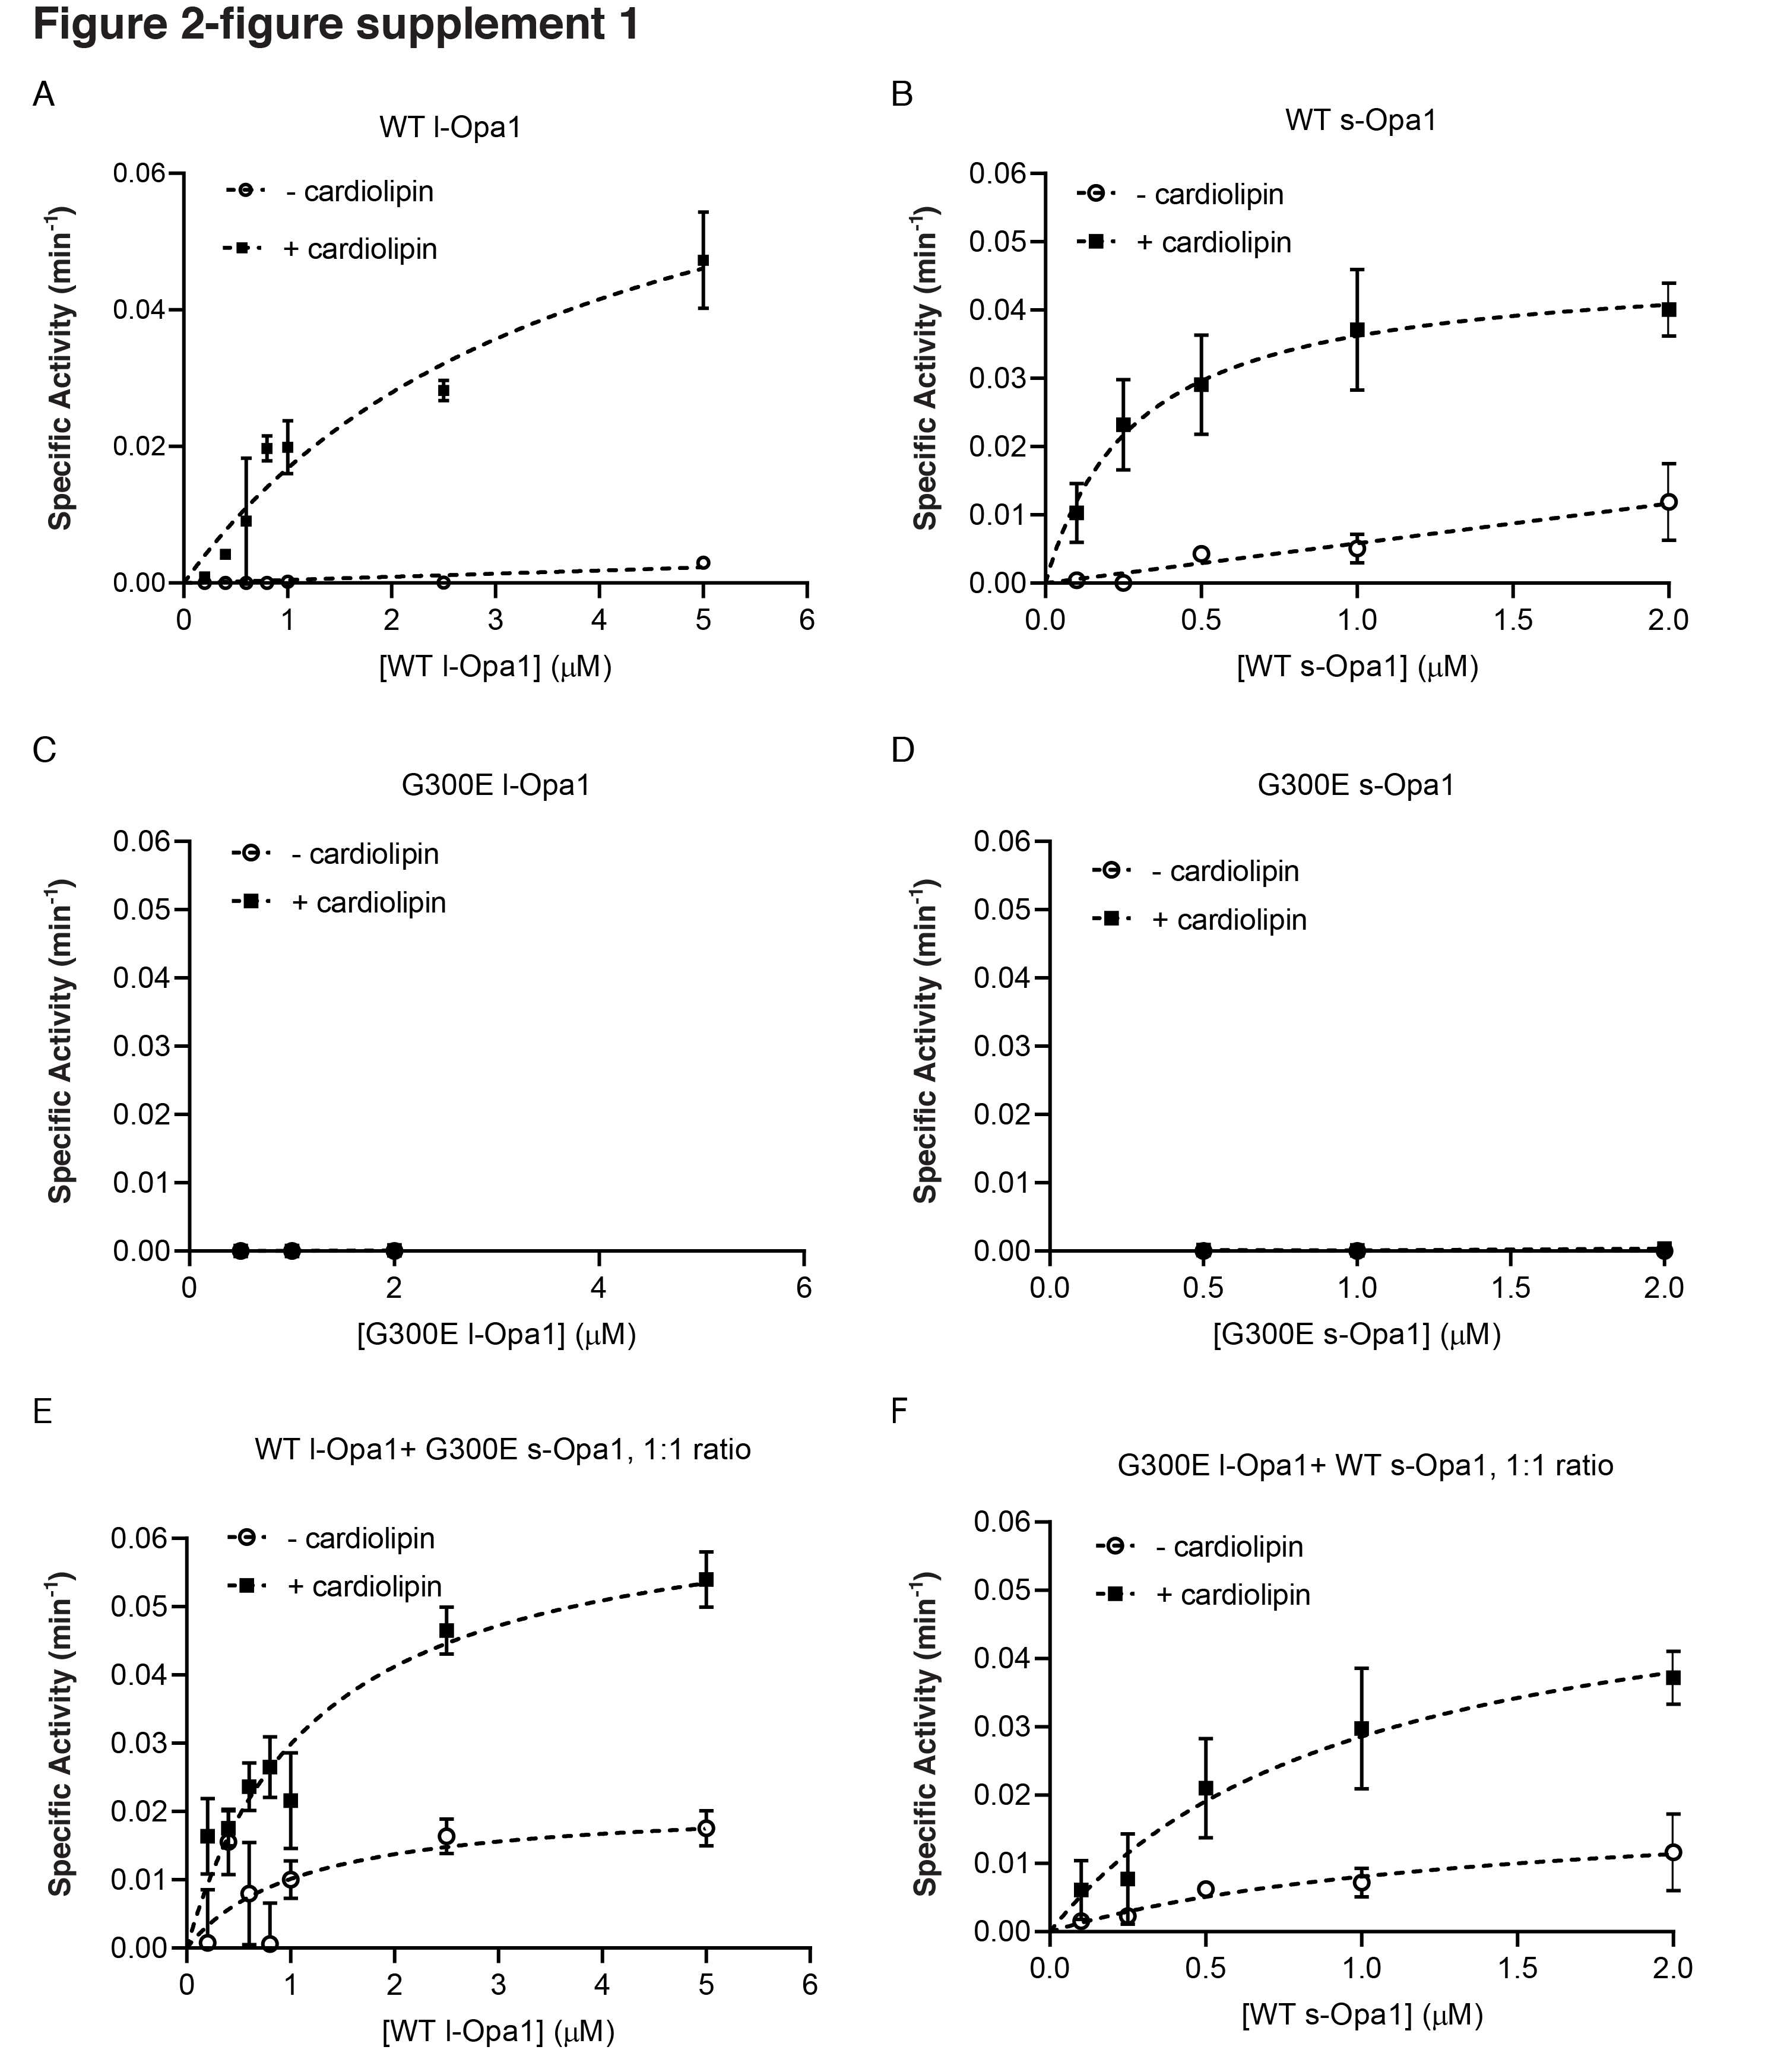

Supplement: supp [file elife-50973-supp-v1.zip › elife_poa_e50973_Figure_2_figure_supplement_1.png]

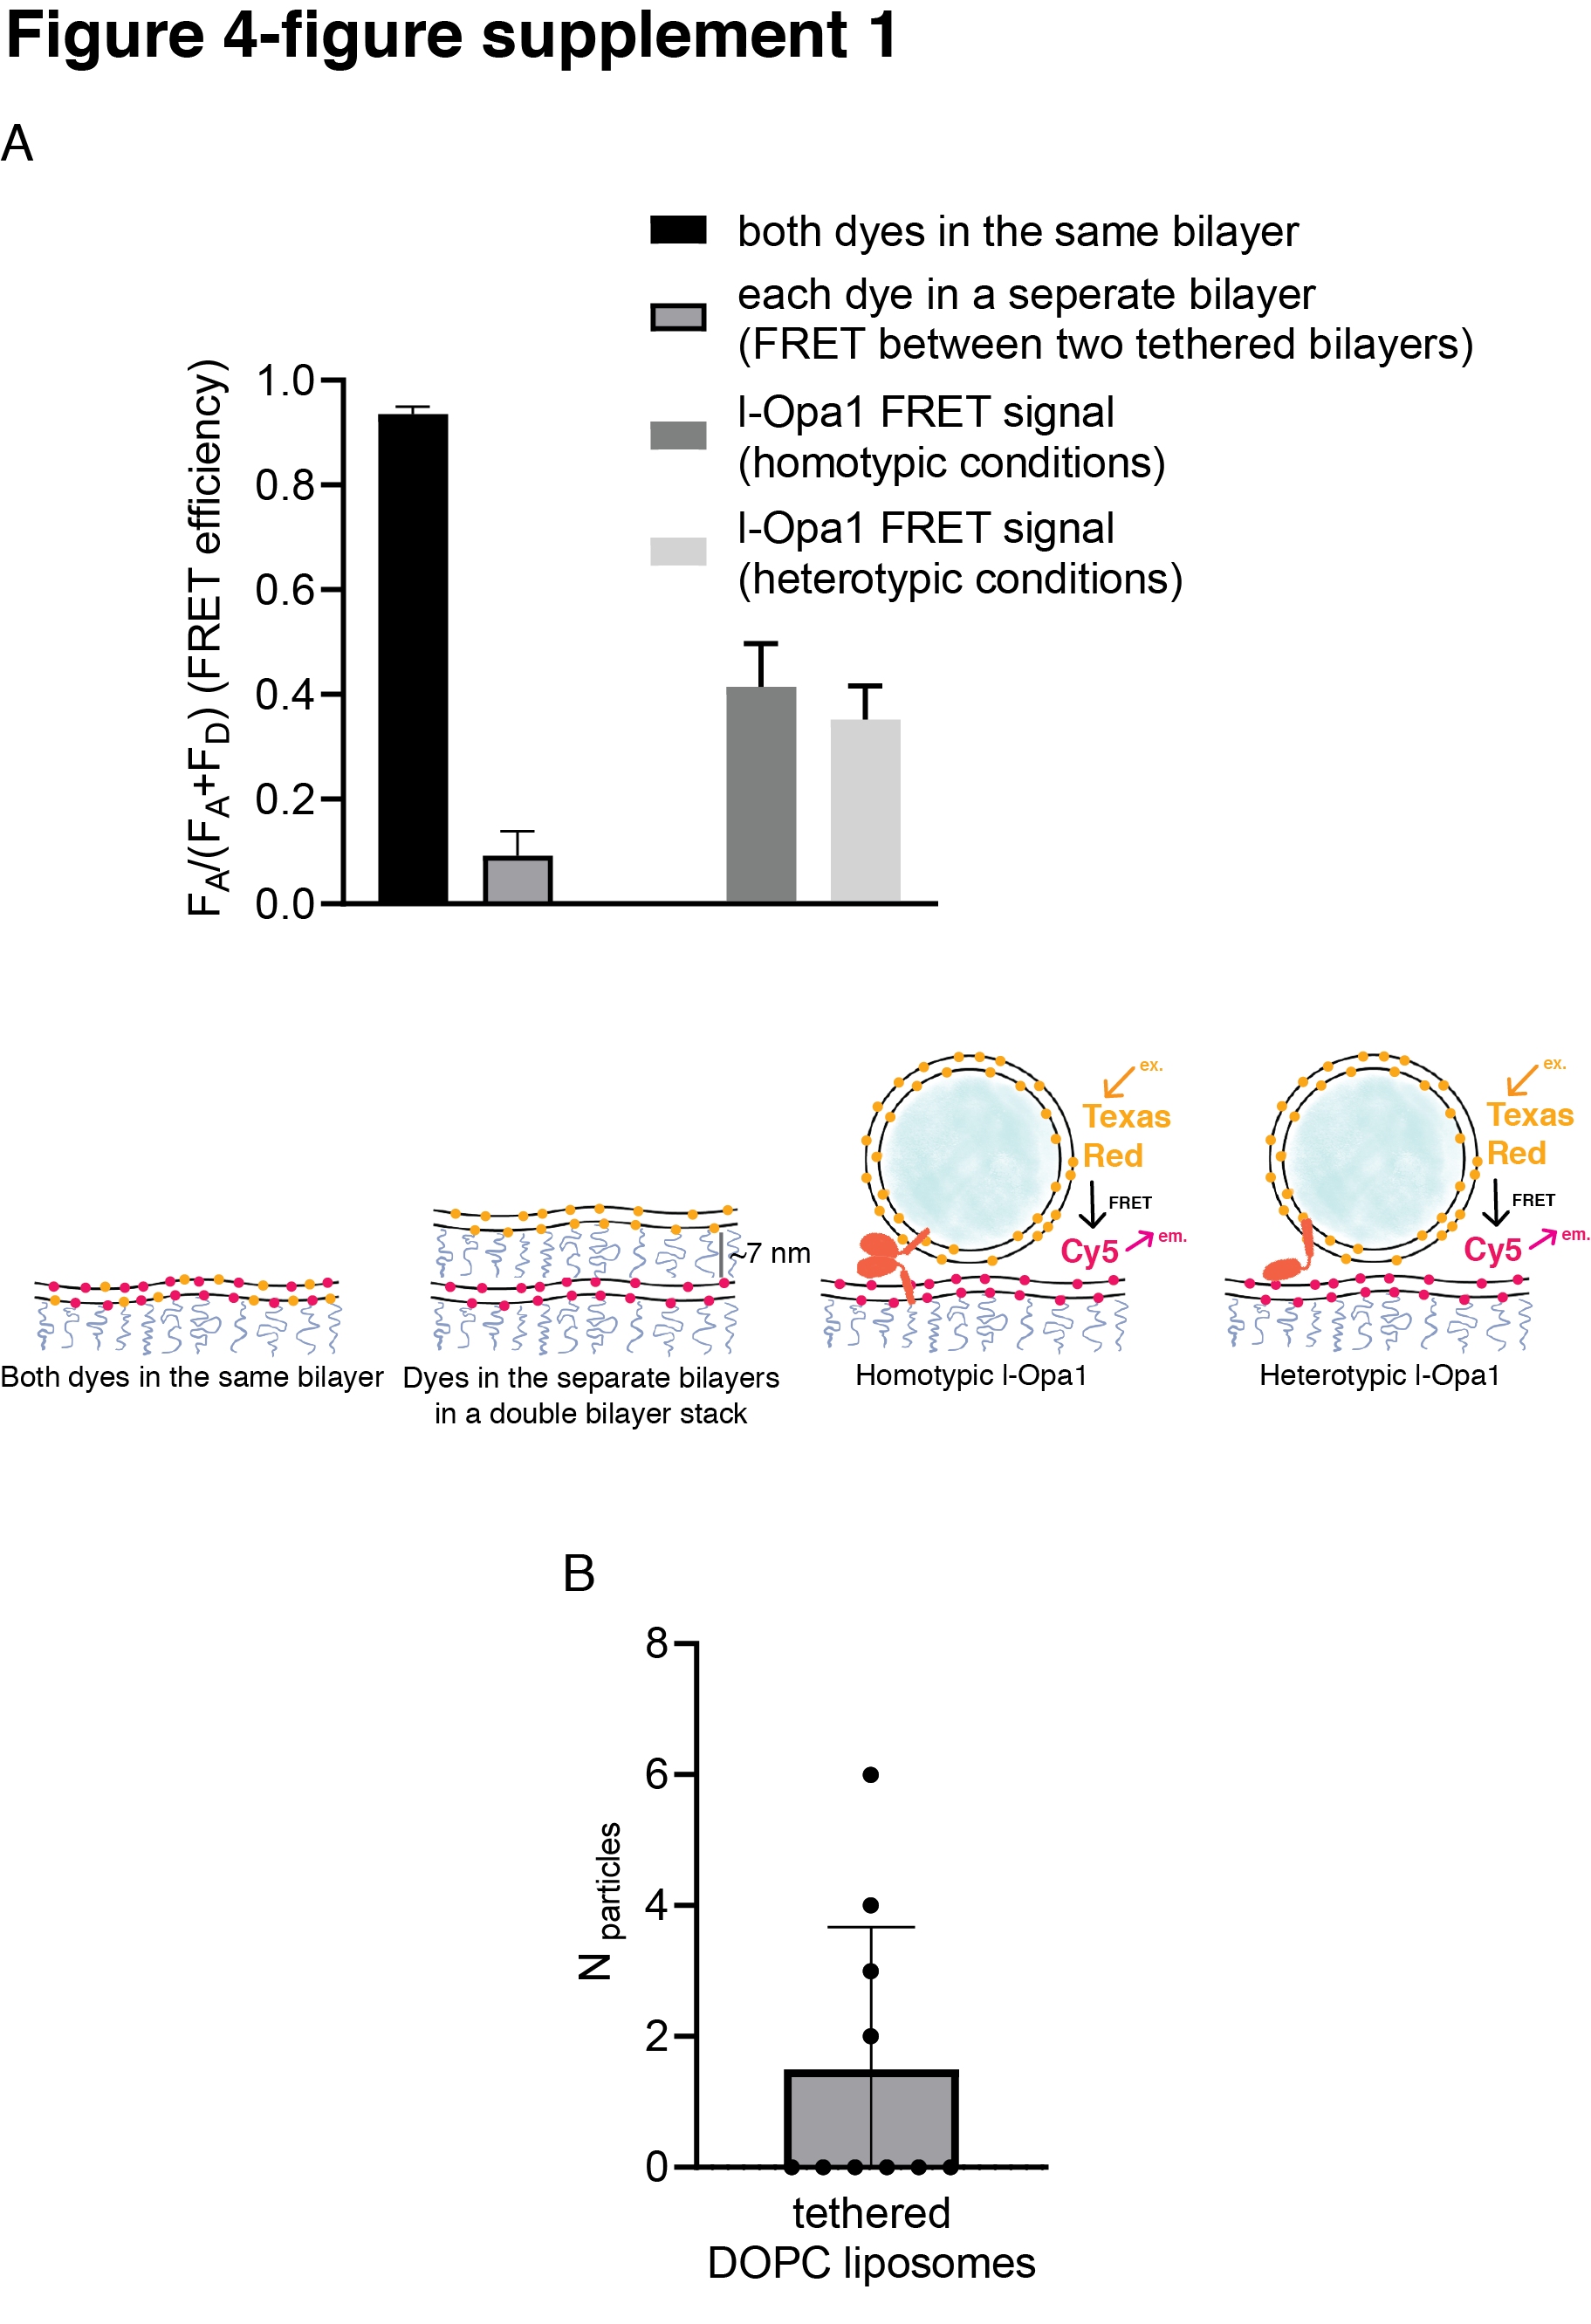

Supplement: supp [file elife-50973-supp-v1.zip › elife_poa_e50973_Figure_4_figure_supplement_1.png]

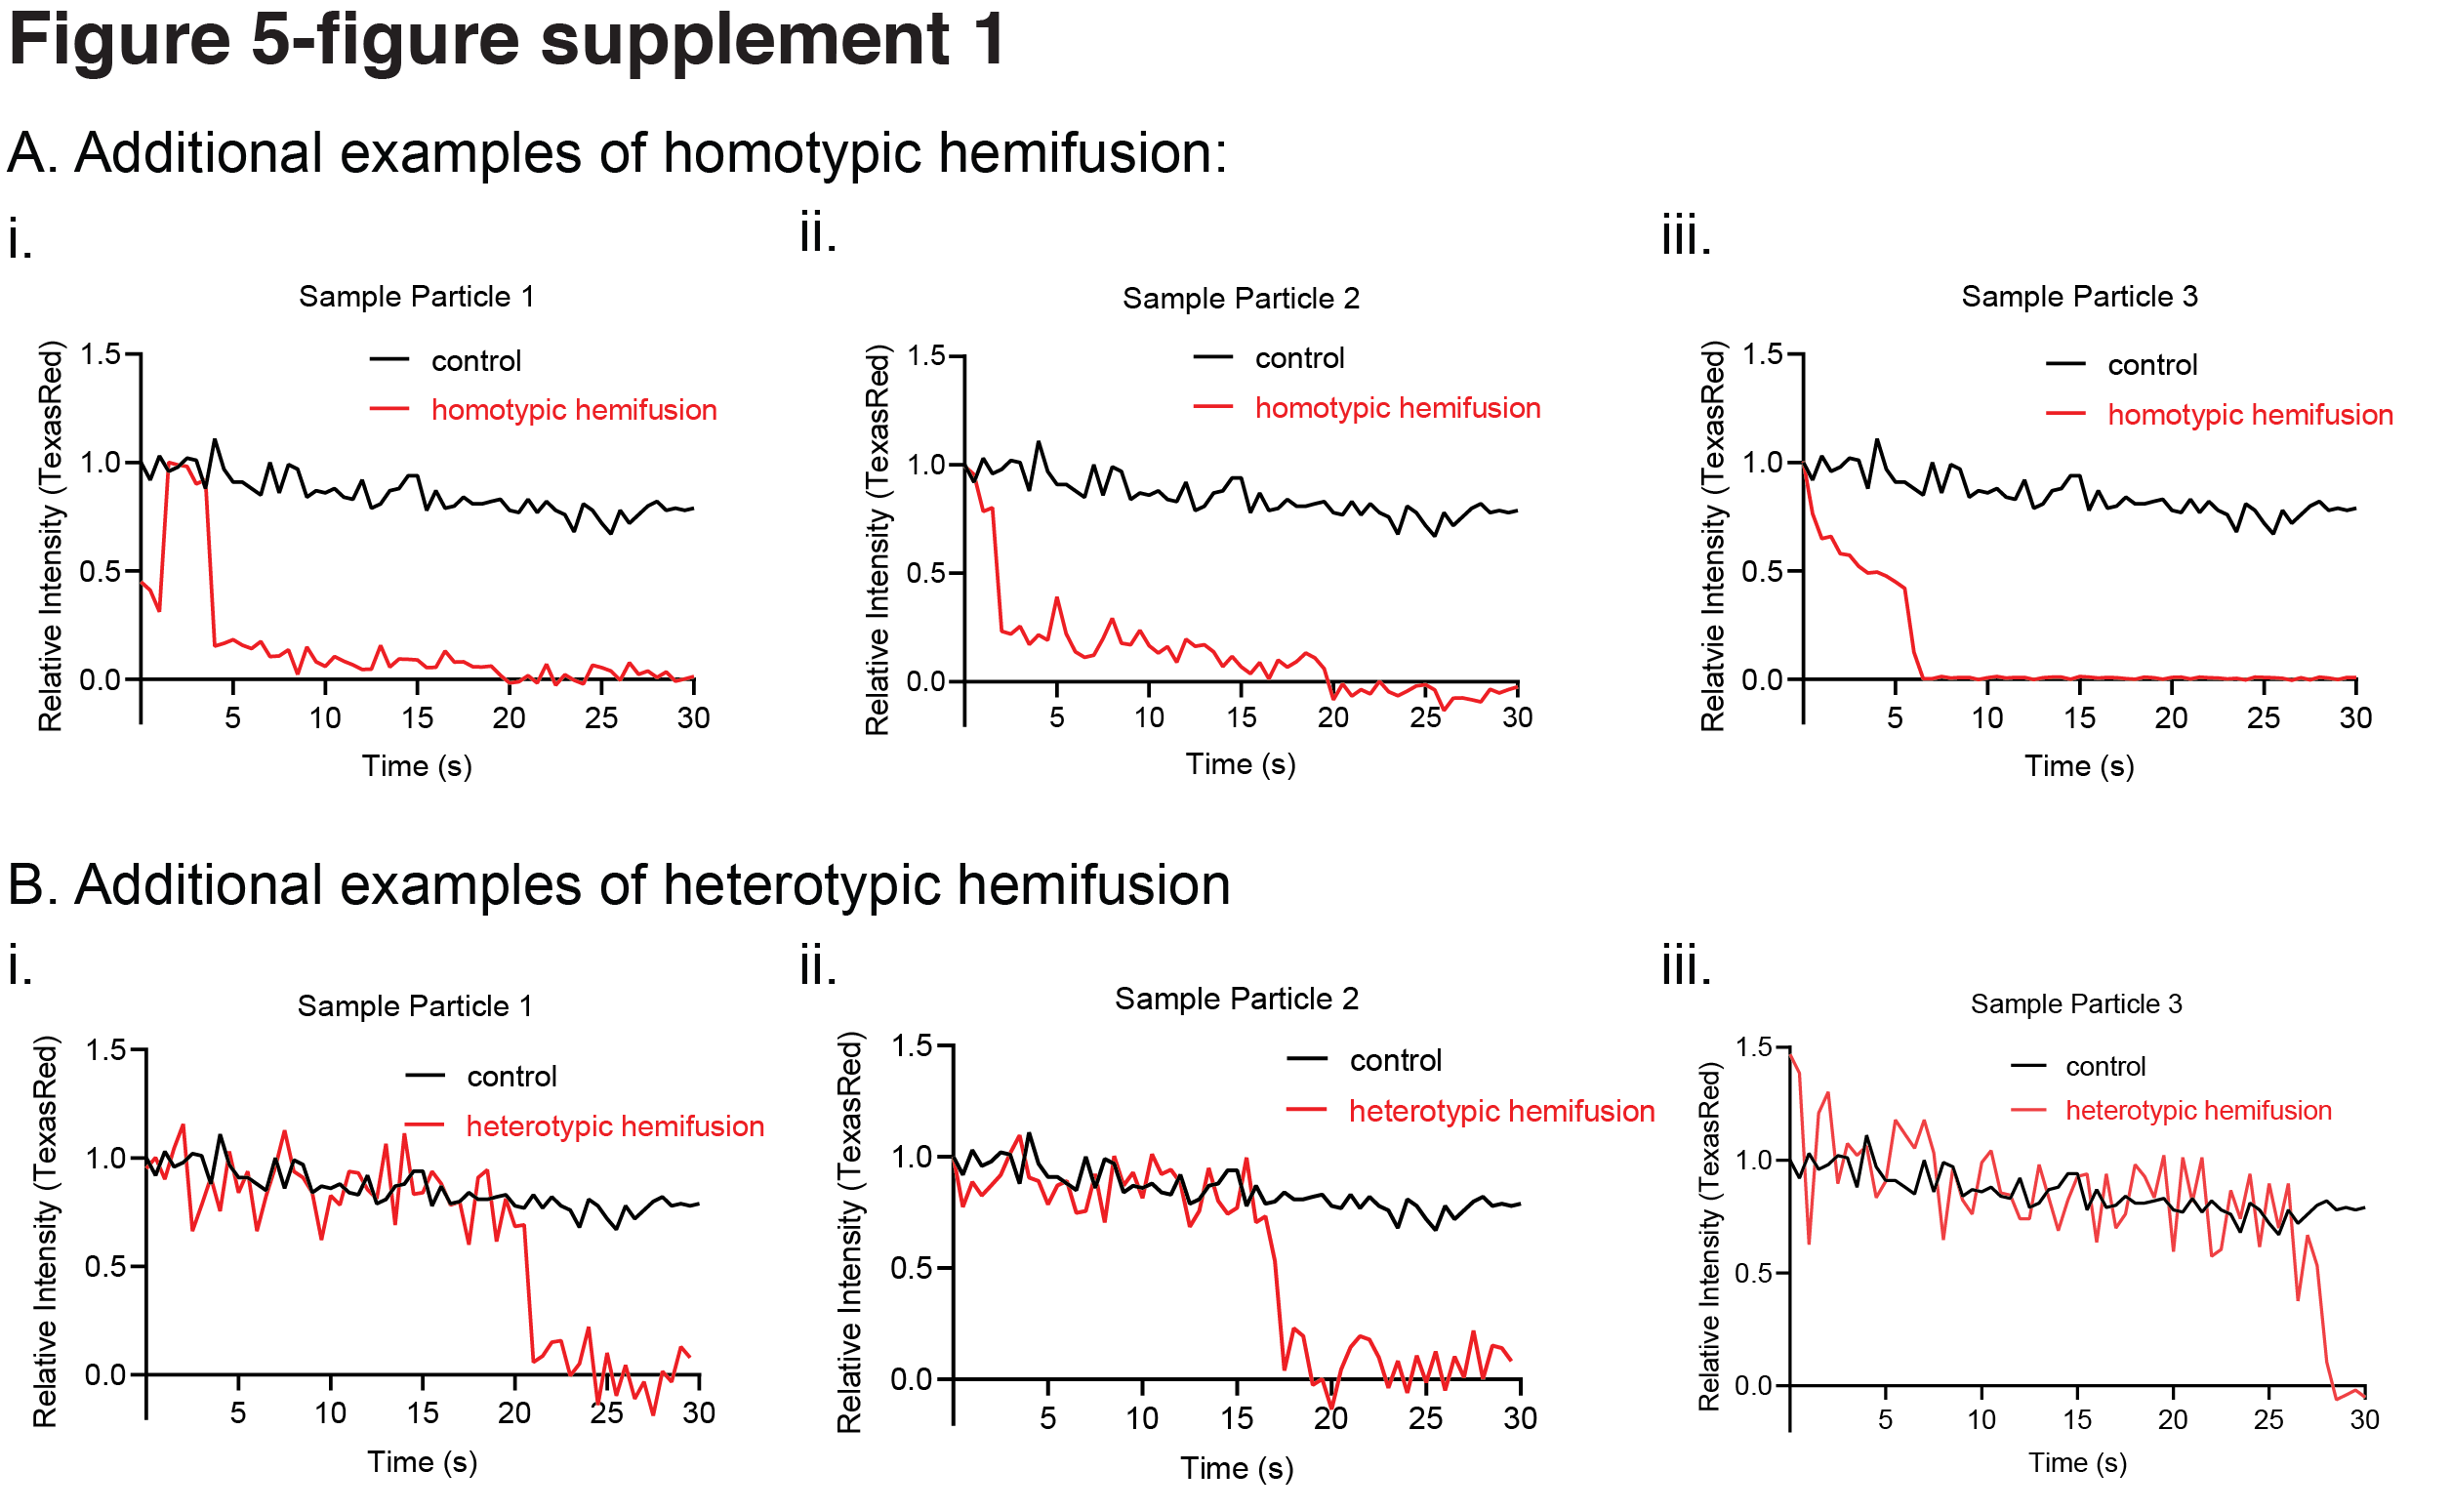

Supplement: supp [file elife-50973-supp-v1.zip › elife_poa_e50973_Figure_5_figure_supplement_1.png]

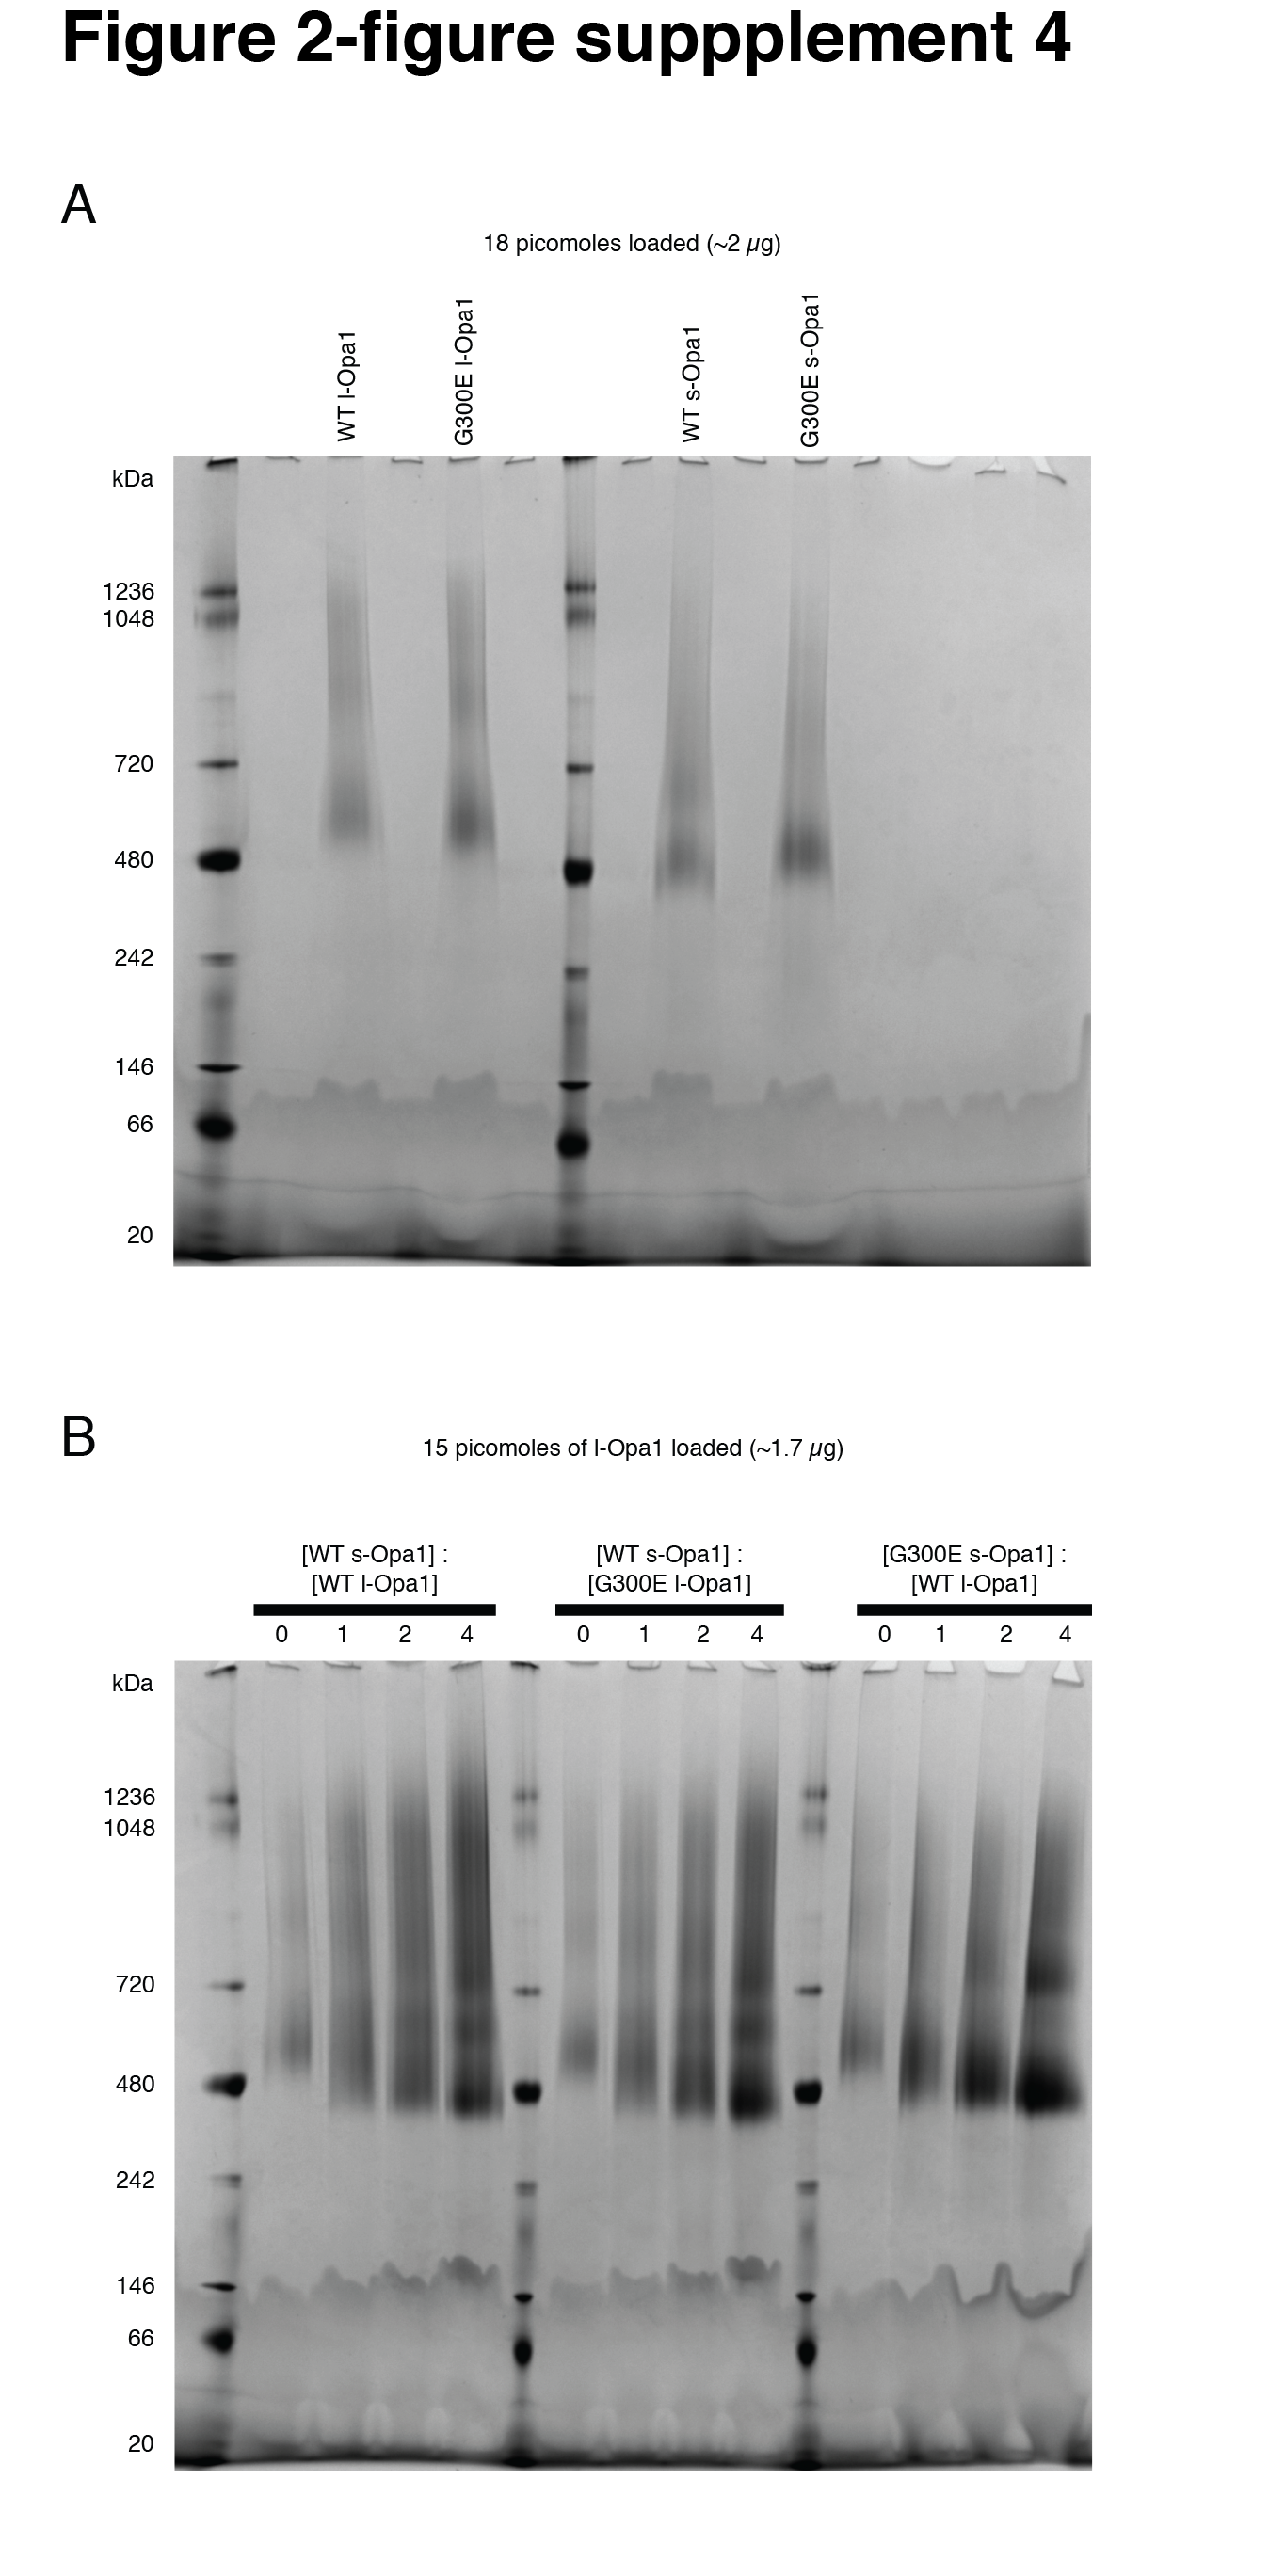

Supplement: supp [file elife-50973-supp-v1.zip › elife_poa_e50973_Figure_2_figure_supplement_4.png]

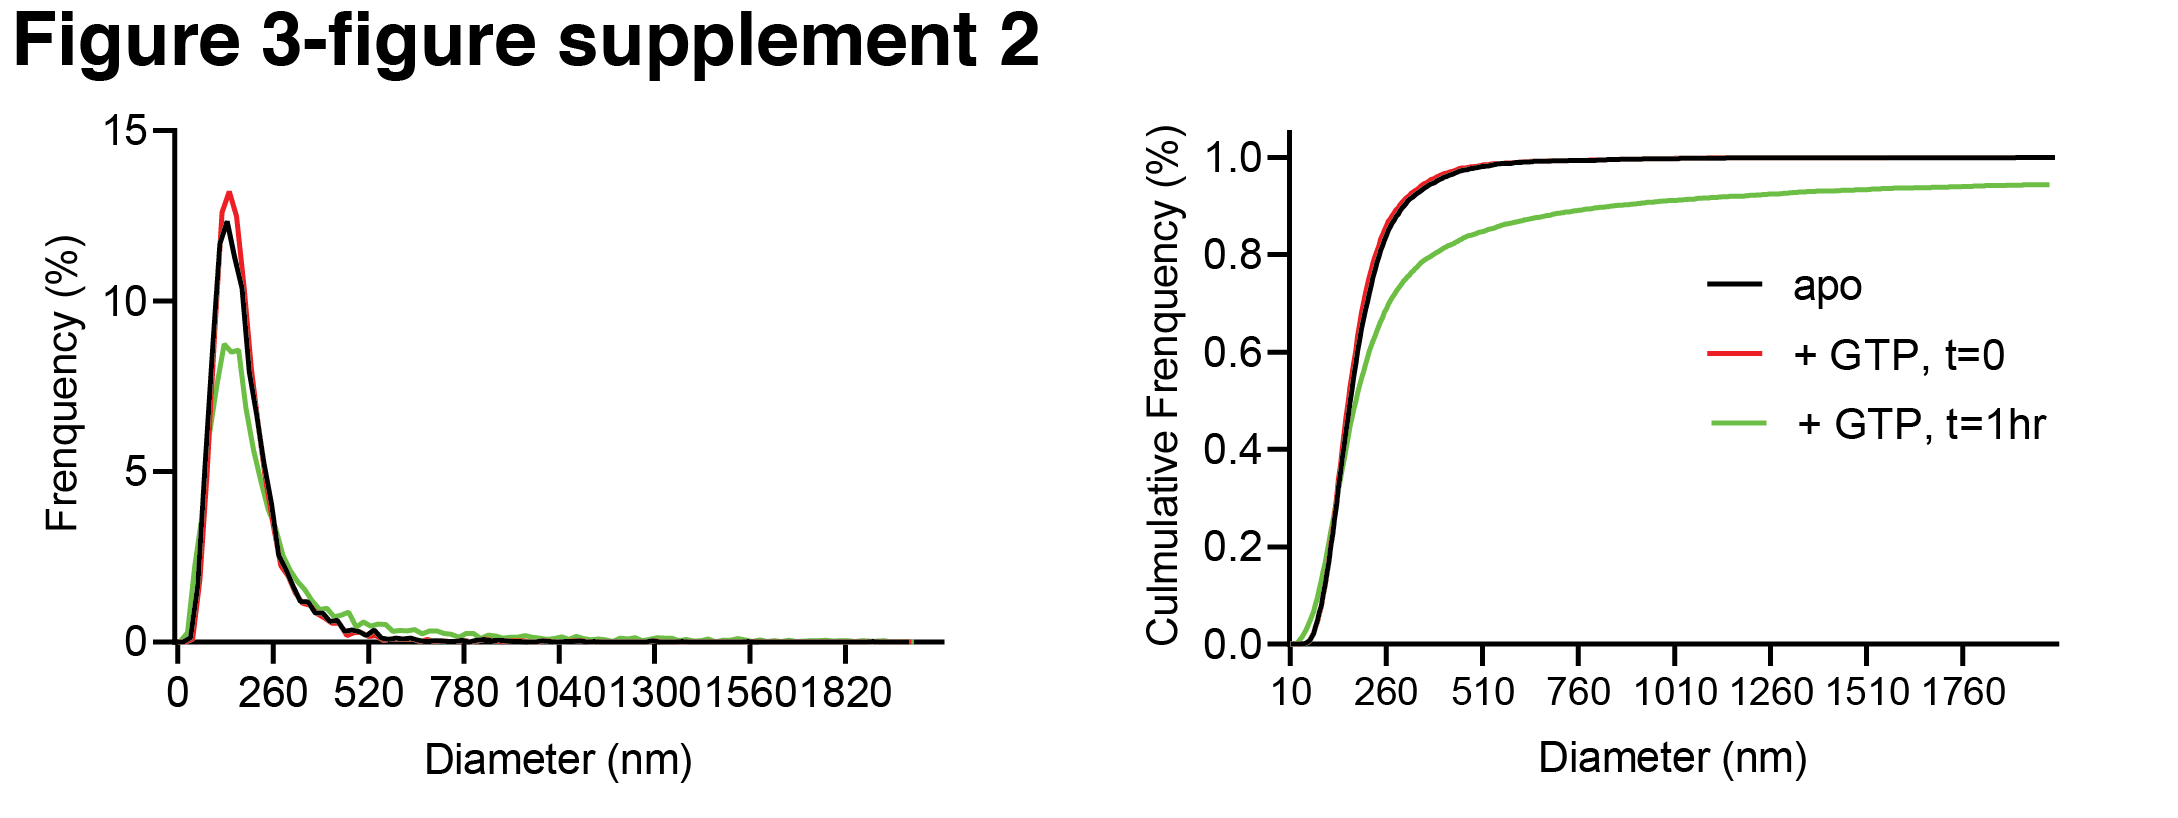

Supplement: supp [file elife-50973-supp-v1.zip › elife_poa_e50973_Figure_3_figure_supplement_2.png]
